# Supplementary material
Source: PubMed Central journal article supplement (PMC3306619)
Supplement: NIHMS354218-supplement-6_si_006.pdf [file NIHMS354218-supplement-6_si_006.pdf]

## Supporting Information

# Total Synthesis of ( $\pm$ )-Rocaglamide *via* Oxidation-Initiated Nazarov Cyclization

John A. Malona, Kevin Cariou, William T. Spencer III, and Alison J. Frontier\*

*Department of Chemistry, University of Rochester, Rochester, New York, 14627*

[frontier@chem.rochester.edu](mailto:frontier@chem.rochester.edu)

## Table of Contents

|                                                                                                            |         |
|------------------------------------------------------------------------------------------------------------|---------|
| 1.0. Spectral Data                                                                                         | S3      |
| 1.1. $^1\text{H}$ NMR and $^{13}\text{C}$ NMR Spectra for <b>5</b>                                         | S4-S5   |
| 1.2. $^1\text{H}$ NMR and $^{13}\text{C}$ NMR Spectra for Spectrum for <b>6</b>                            | S6-S7   |
| 1.3. $^1\text{H}$ NMR Spectrum for <b>7a</b>                                                               | S8      |
| 1.4. $^1\text{H}$ NMR and $^{13}\text{C}$ NMR Spectra for <b>8a</b>                                        | S9-S10  |
| 1.5. $^1\text{H}$ NMR Spectrum for <b>2,4-dimethoxy-6-((2-(trimethylsilyl)ethoxy)methoxy) benzaldehyde</b> | S11     |
| 1.6. $^1\text{H}$ NMR Spectrum for <b>7b</b>                                                               | S12     |
| 1.7. $^1\text{H}$ NMR and $^{13}\text{C}$ NMR Spectra for <b>8b</b>                                        | S13-S14 |
| 1.8. $^1\text{H}$ NMR and $^{13}\text{C}$ NMR Spectra for <b>9</b>                                         | S15-S16 |
| 1.9. $^1\text{H}$ NMR Spectrum for <b>2-hydroxy-2-(4-methoxyphenyl)acetonitrile</b>                        | S17     |
| 1.10. $^1\text{H}$ NMR Spectrum for <b>Compound 10 Precursor</b>                                           | S18     |
| 1.11. $^1\text{H}$ NMR Spectrum for <b>Compound 10</b>                                                     | S18     |
| 1.12. $^1\text{H}$ NMR and $^{13}\text{C}$ NMR Spectra for <b>11</b>                                       | S19     |
| 1.13. $^1\text{H}$ NMR and $^{13}\text{C}$ NMR Spectra for <b>12</b>                                       | S20     |
| 1.14. $^1\text{H}$ NMR and $^{13}\text{C}$ NMR Spectra for <b>13</b>                                       | S21     |
| 1.15. $^1\text{H}$ NMR and $^{13}\text{C}$ NMR Spectra for <b>3</b>                                        | S22     |
| 1.16. $^1\text{H}$ NMR and $^{13}\text{C}$ NMR Spectra for <b>16</b>                                       | S23     |
| 1.17. $^1\text{H}$ NMR and $^{13}\text{C}$ NMR Spectra for <b>17a</b>                                      | S24     |
| 1.18. $^1\text{H}$ NMR and $^{13}\text{C}$ NMR Spectra for <b>18a</b>                                      | S25     |
| 1.19. $^1\text{H}$ NMR and $^{13}\text{C}$ NMR Spectra for <b>18b</b>                                      | S26     |
| 1.20. $^1\text{H}$ NMR and $^{13}\text{C}$ NMR Spectra for <b>18c</b>                                      | S27-S28 |
| 1.21. $^1\text{H}$ NMR Spectrum for <b>17b</b>                                                             | S29     |

|       |                                                                         |         |
|-------|-------------------------------------------------------------------------|---------|
| 1.22. | <sup>1</sup> H NMR and <sup>13</sup> C NMR Spectra for <b>18d</b> ----- | S30-S31 |
| 1.23. | <sup>1</sup> H NMR and <sup>13</sup> C NMR Spectra for <b>19a</b> ----- | S32-S33 |
| 1.24. | <sup>1</sup> H NMR and <sup>13</sup> C NMR Spectra for <b>15a</b> ----- | S34     |
| 1.25. | <sup>1</sup> H NMR and <sup>13</sup> C NMR Spectra for <b>15b</b> ----- | S35     |
| 1.26. | <sup>1</sup> H NMR and <sup>13</sup> C NMR Spectra for <b>20</b> -----  | S36-S37 |
| 1.27. | <sup>1</sup> H NMR and <sup>13</sup> C NMR Spectra for <b>22</b> -----  | S38-S39 |
| 1.28. | <sup>1</sup> H NMR and <sup>13</sup> C NMR Spectra for <b>26</b> -----  | S40-S41 |
| 1.29. | <sup>1</sup> H NMR and <sup>13</sup> C NMR Spectra for <b>27</b> -----  | S42-S43 |
| 1.30. | <sup>1</sup> H NMR Spectrum for <b>28a</b> -----                        | S44     |
| 1.31. | <sup>1</sup> H NMR and <sup>13</sup> C NMR Spectra for <b>28b</b> ----- | S45-S46 |
| 1.32. | <sup>1</sup> H NMR Spectrum for <b>29</b> -----                         | S47     |
| 1.33. | <sup>1</sup> H NMR and <sup>13</sup> C NMR Spectra for <b>37</b> -----  | S48     |
| 1.34. | <sup>1</sup> H NMR and <sup>13</sup> C NMR Spectra for <b>38</b> -----  | S49     |
| 1.35. | <sup>1</sup> H NMR and <sup>13</sup> C NMR Spectra for <b>39</b> -----  | S50     |
| 1.36. | <sup>1</sup> H NMR and <sup>13</sup> C NMR Spectra for <b>41</b> -----  | S51     |
| 1.37. | <sup>1</sup> H NMR and <sup>13</sup> C NMR Spectra for <b>42</b> -----  | S52     |
| 1.38. | <sup>1</sup> H NMR and <sup>13</sup> C NMR Spectra for <b>40</b> -----  | S53     |
| 1.39. | <sup>1</sup> H NMR and <sup>13</sup> C NMR Spectra for <b>1e</b> -----  | S54     |
| 1.40. | <sup>1</sup> H NMR and <sup>13</sup> C NMR Spectra for <b>1d</b> -----  | S55     |
| 1.41. | <sup>1</sup> H NMR and <sup>13</sup> C NMR Spectra for <b>1a</b> -----  | S56     |
| 2.0.  | Justification for Structure Assignment of Mixed Ketal <b>27</b> -----   | S57     |

## **1.0. Spectral Data.**

Compound 5

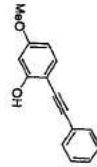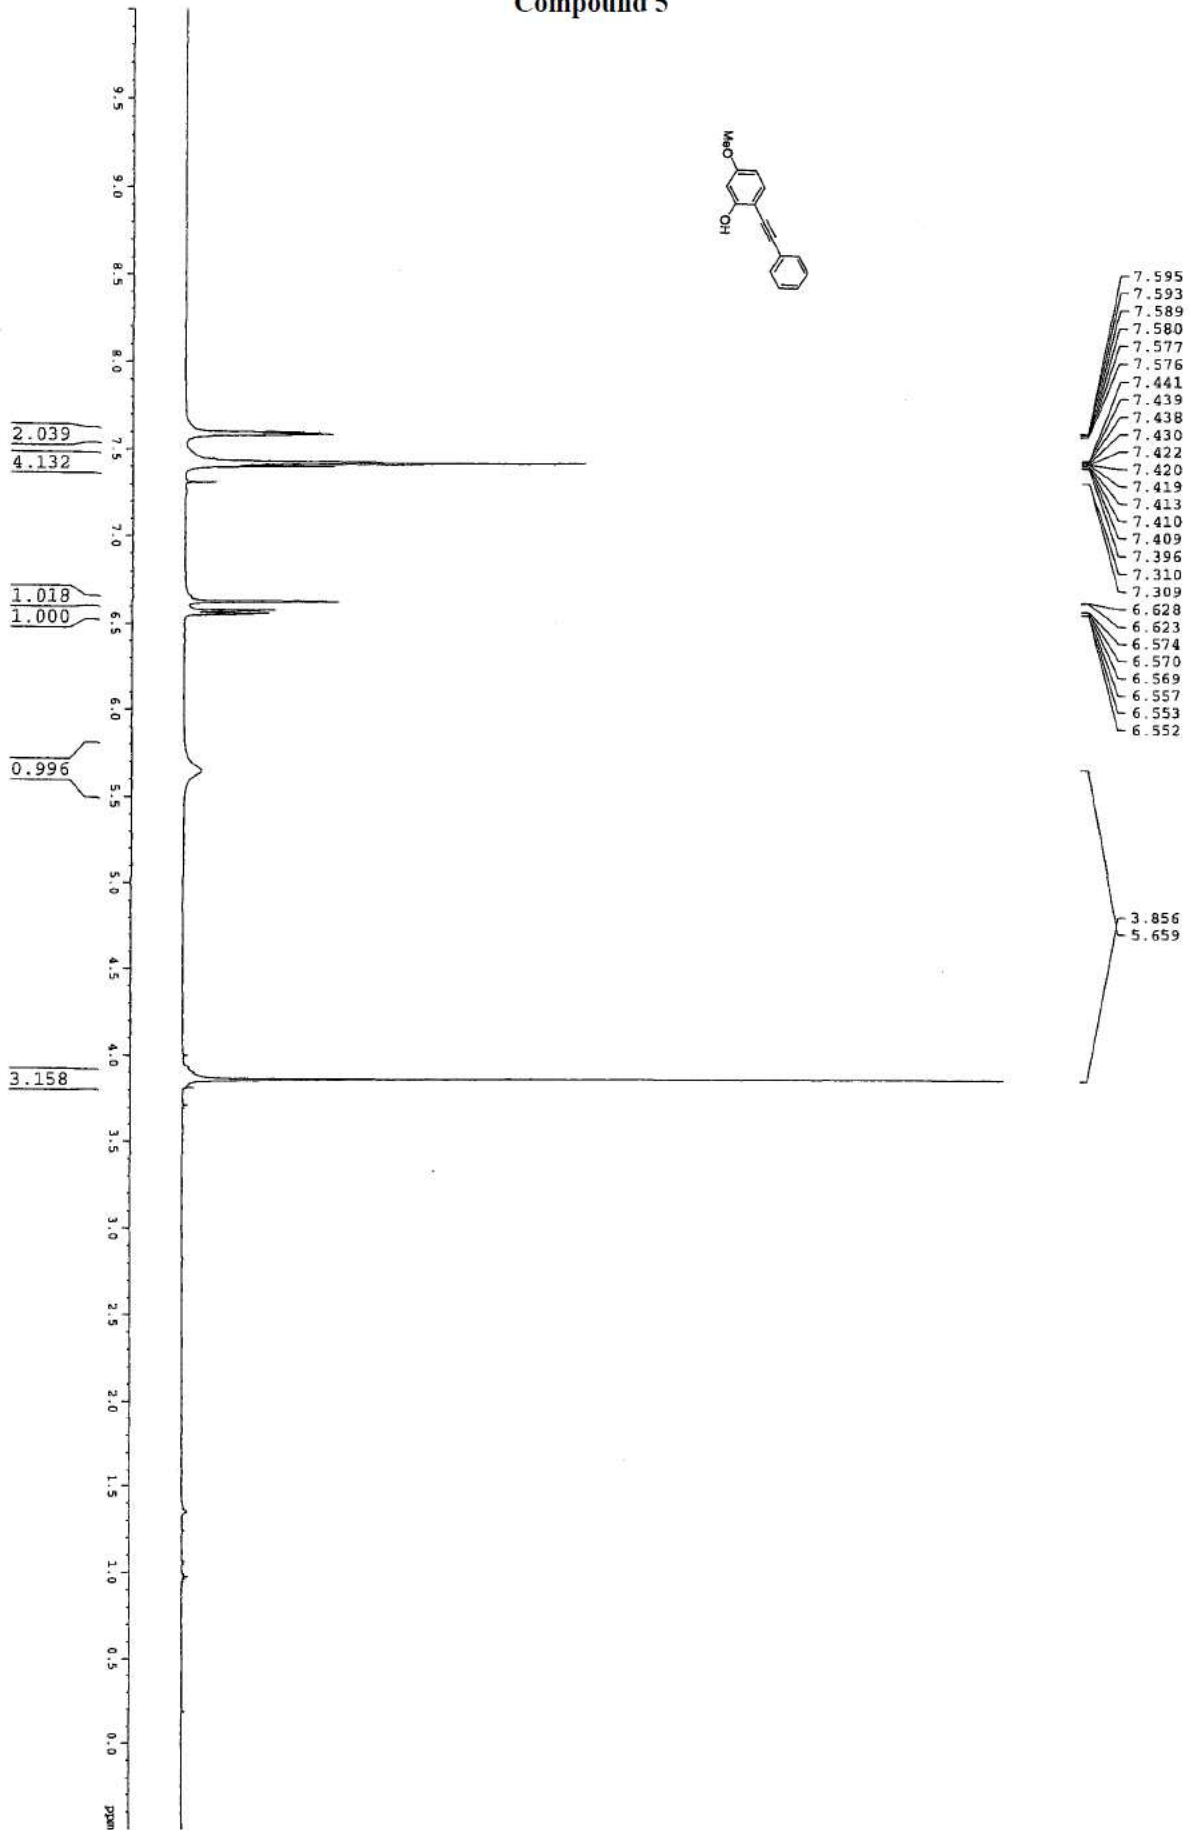

# Compound 5

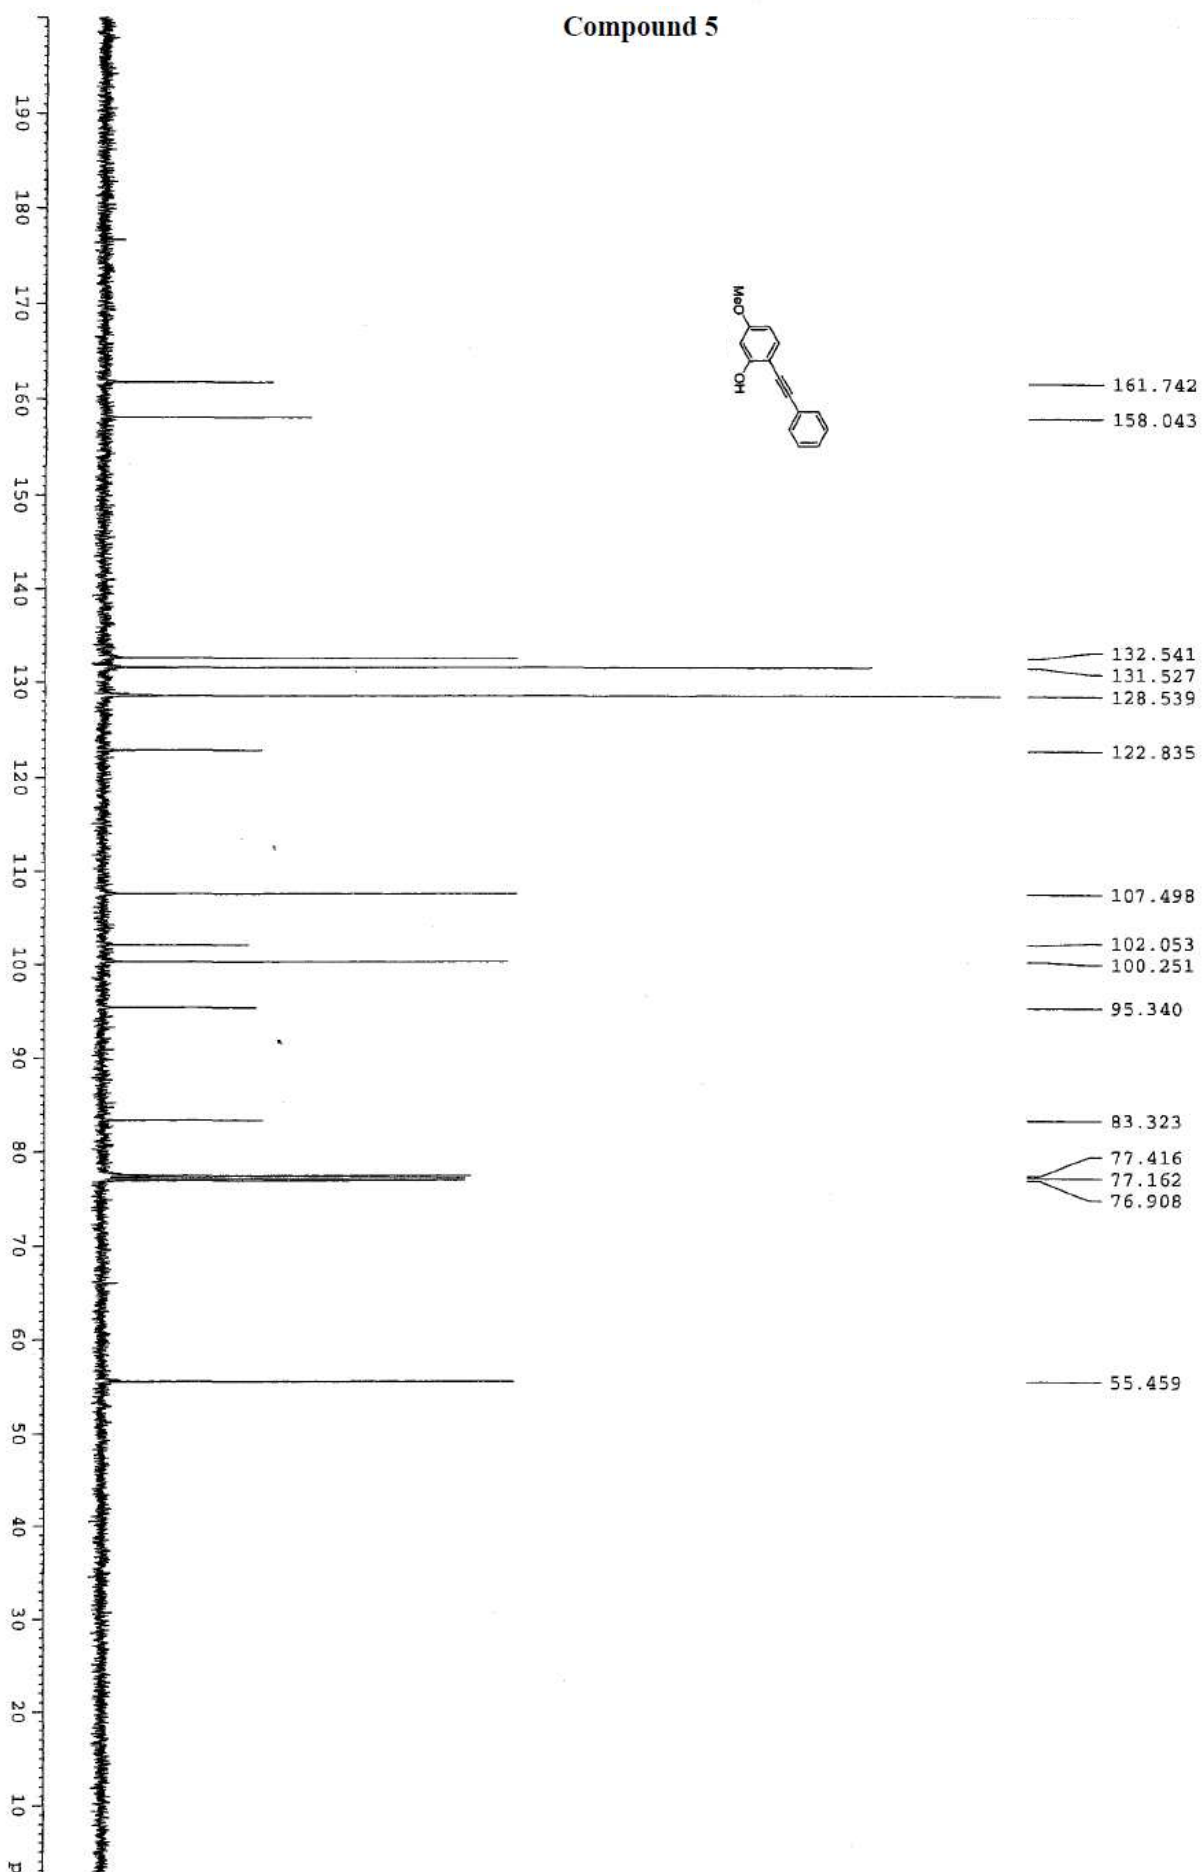

# Compound 6

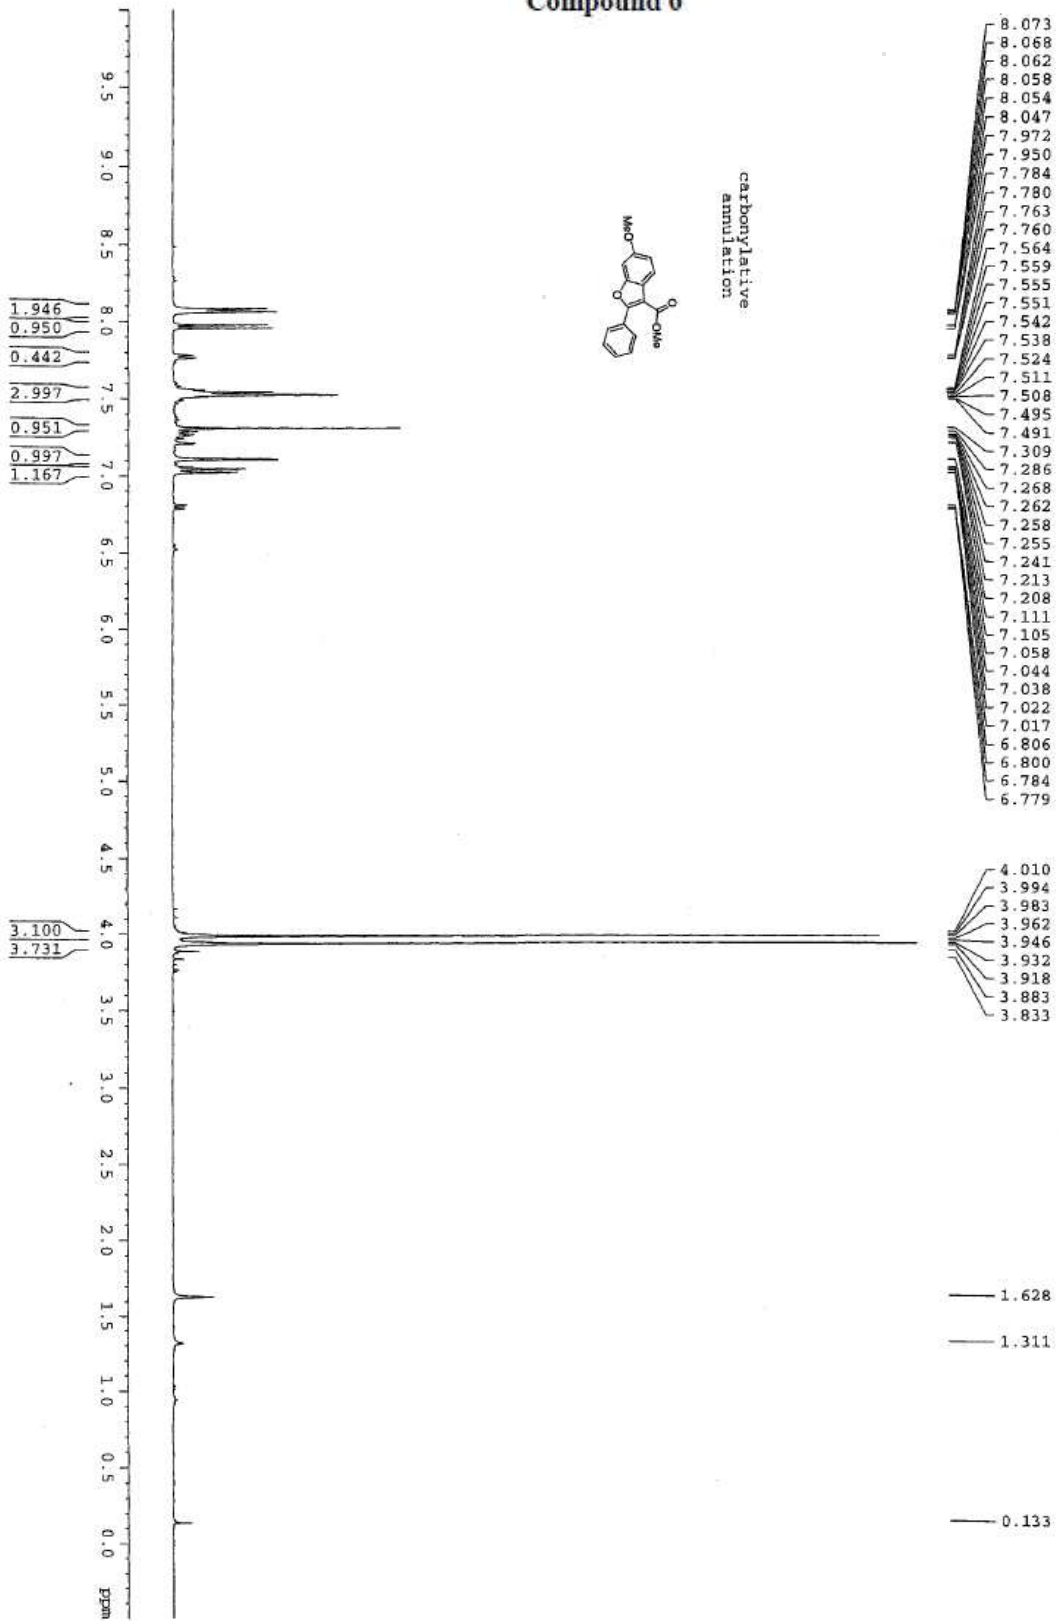

# Compound 6

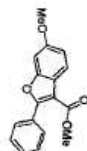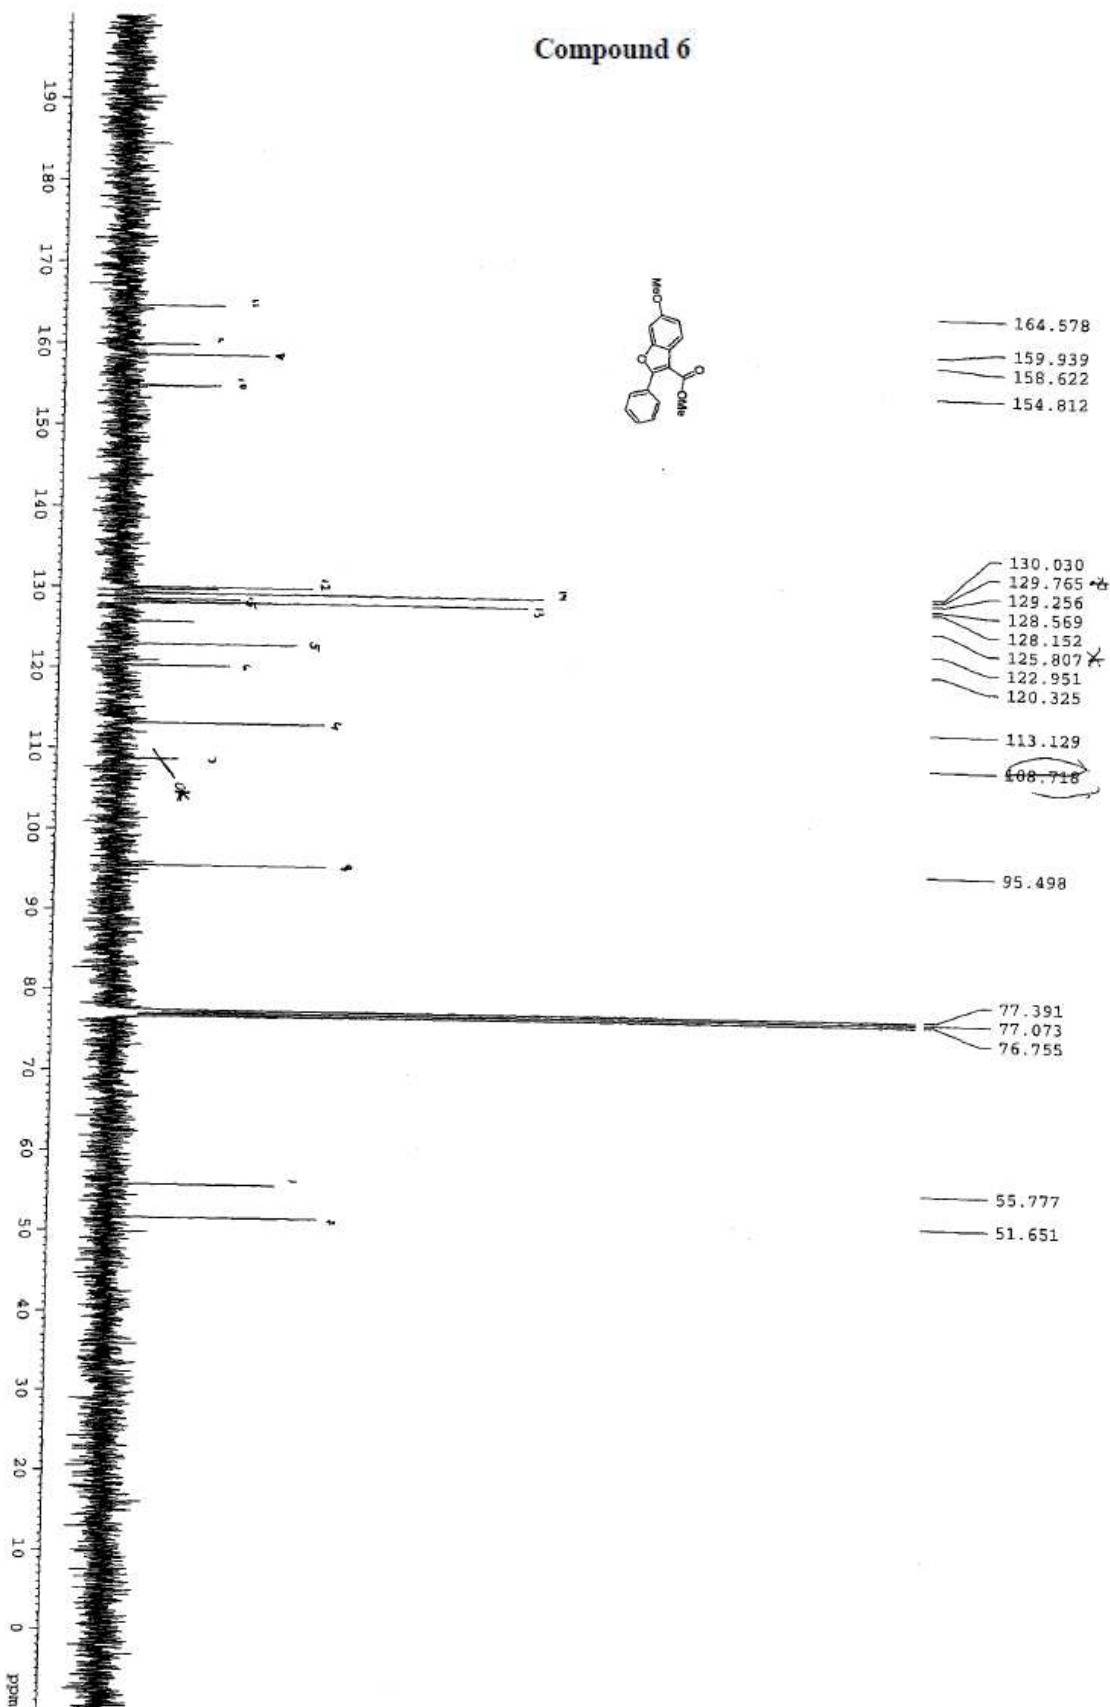

# Compound 7a

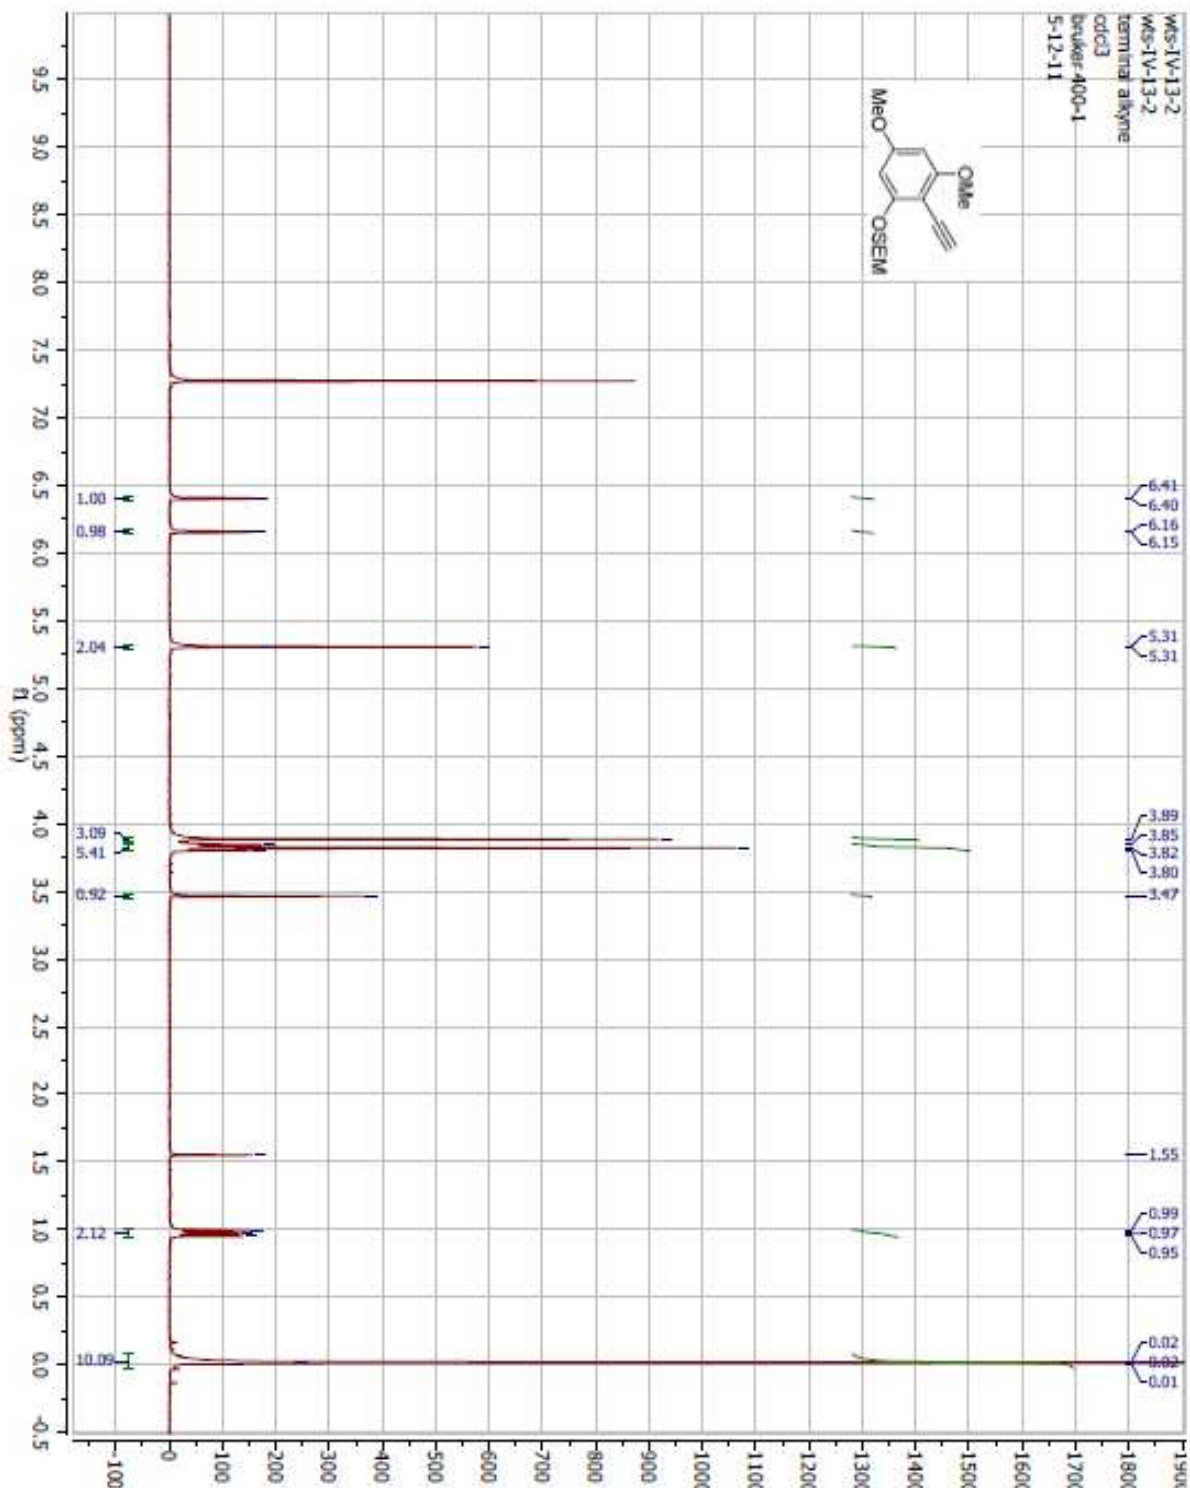



# Compound 8a

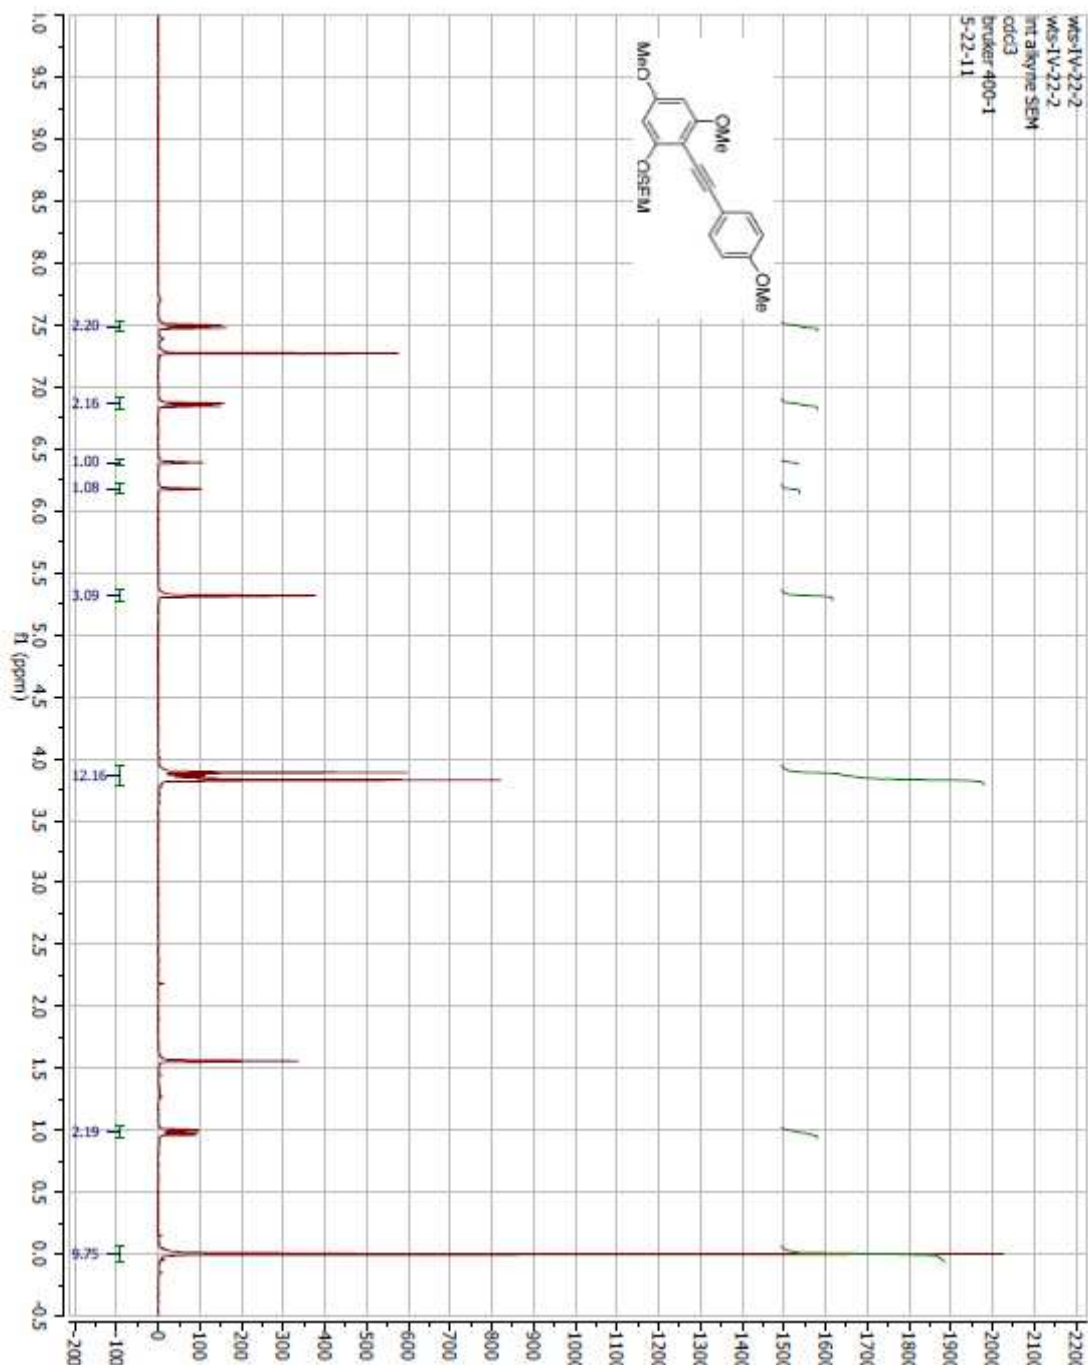

# Compound 8a

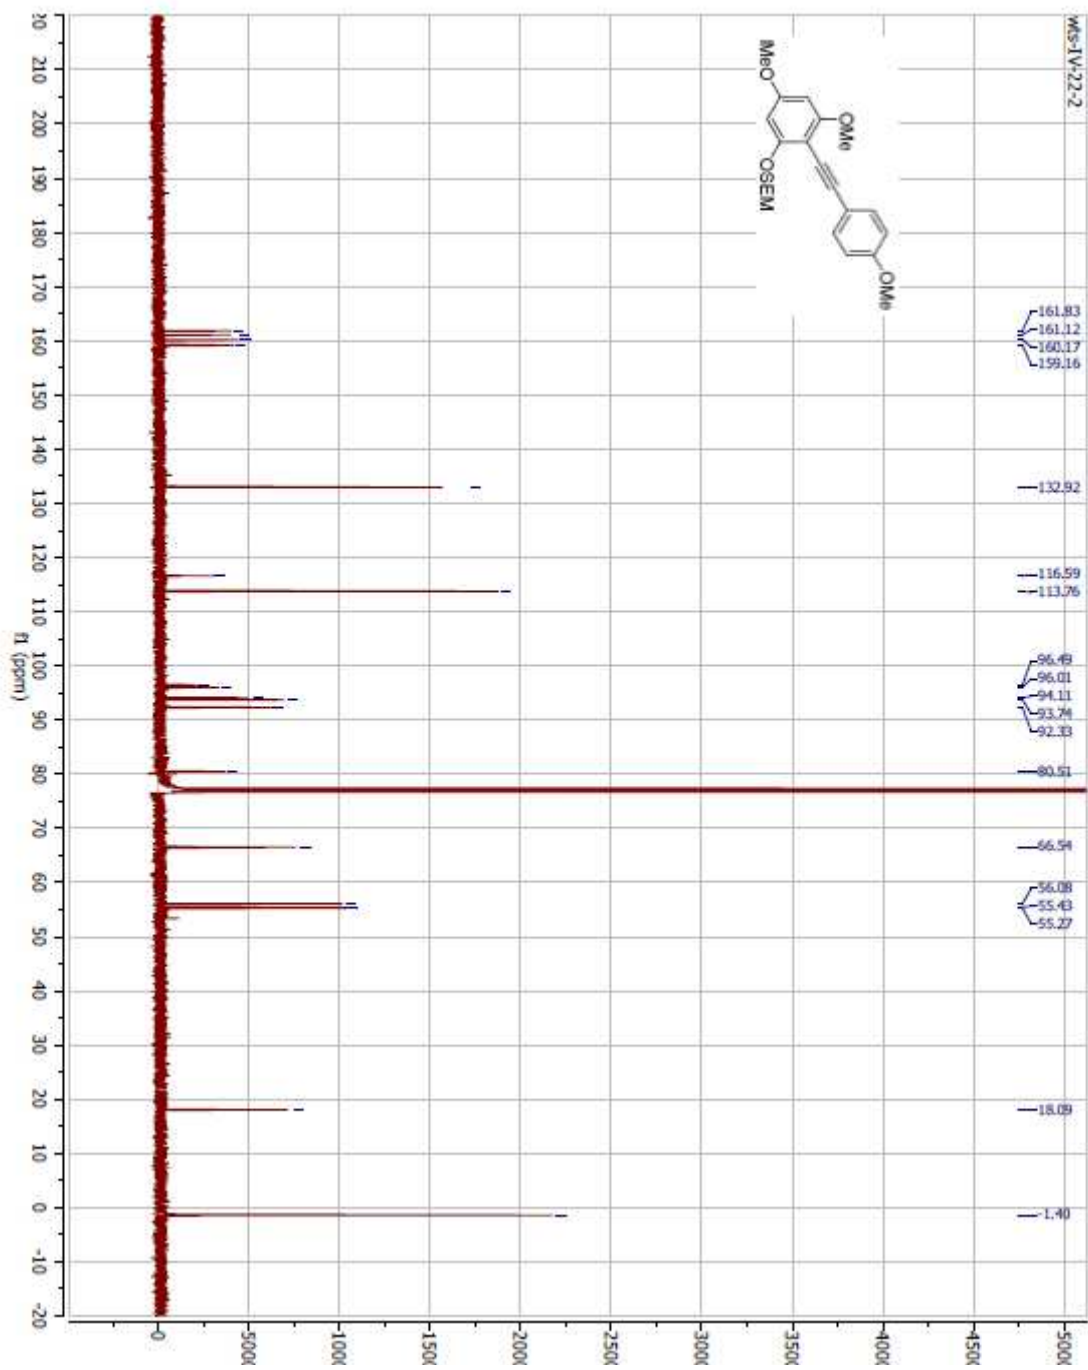

2,4-dimethoxy-6-((2-(trimethylsilyl)ethoxy)methoxy)benzaldehyde (precursor to 7)

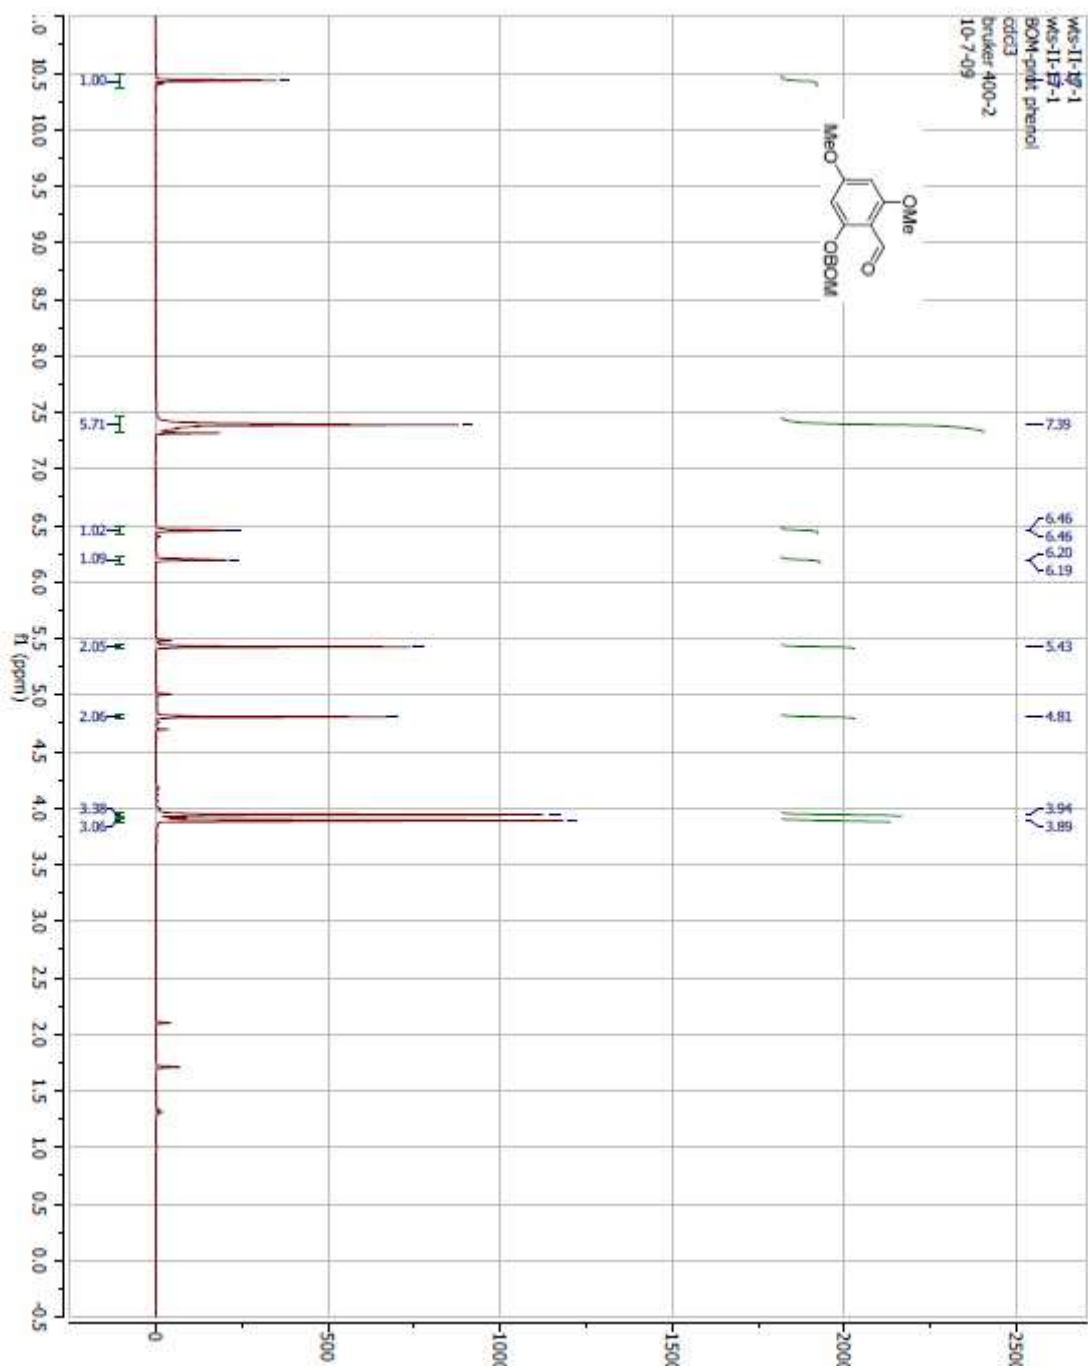

# Compound 7b

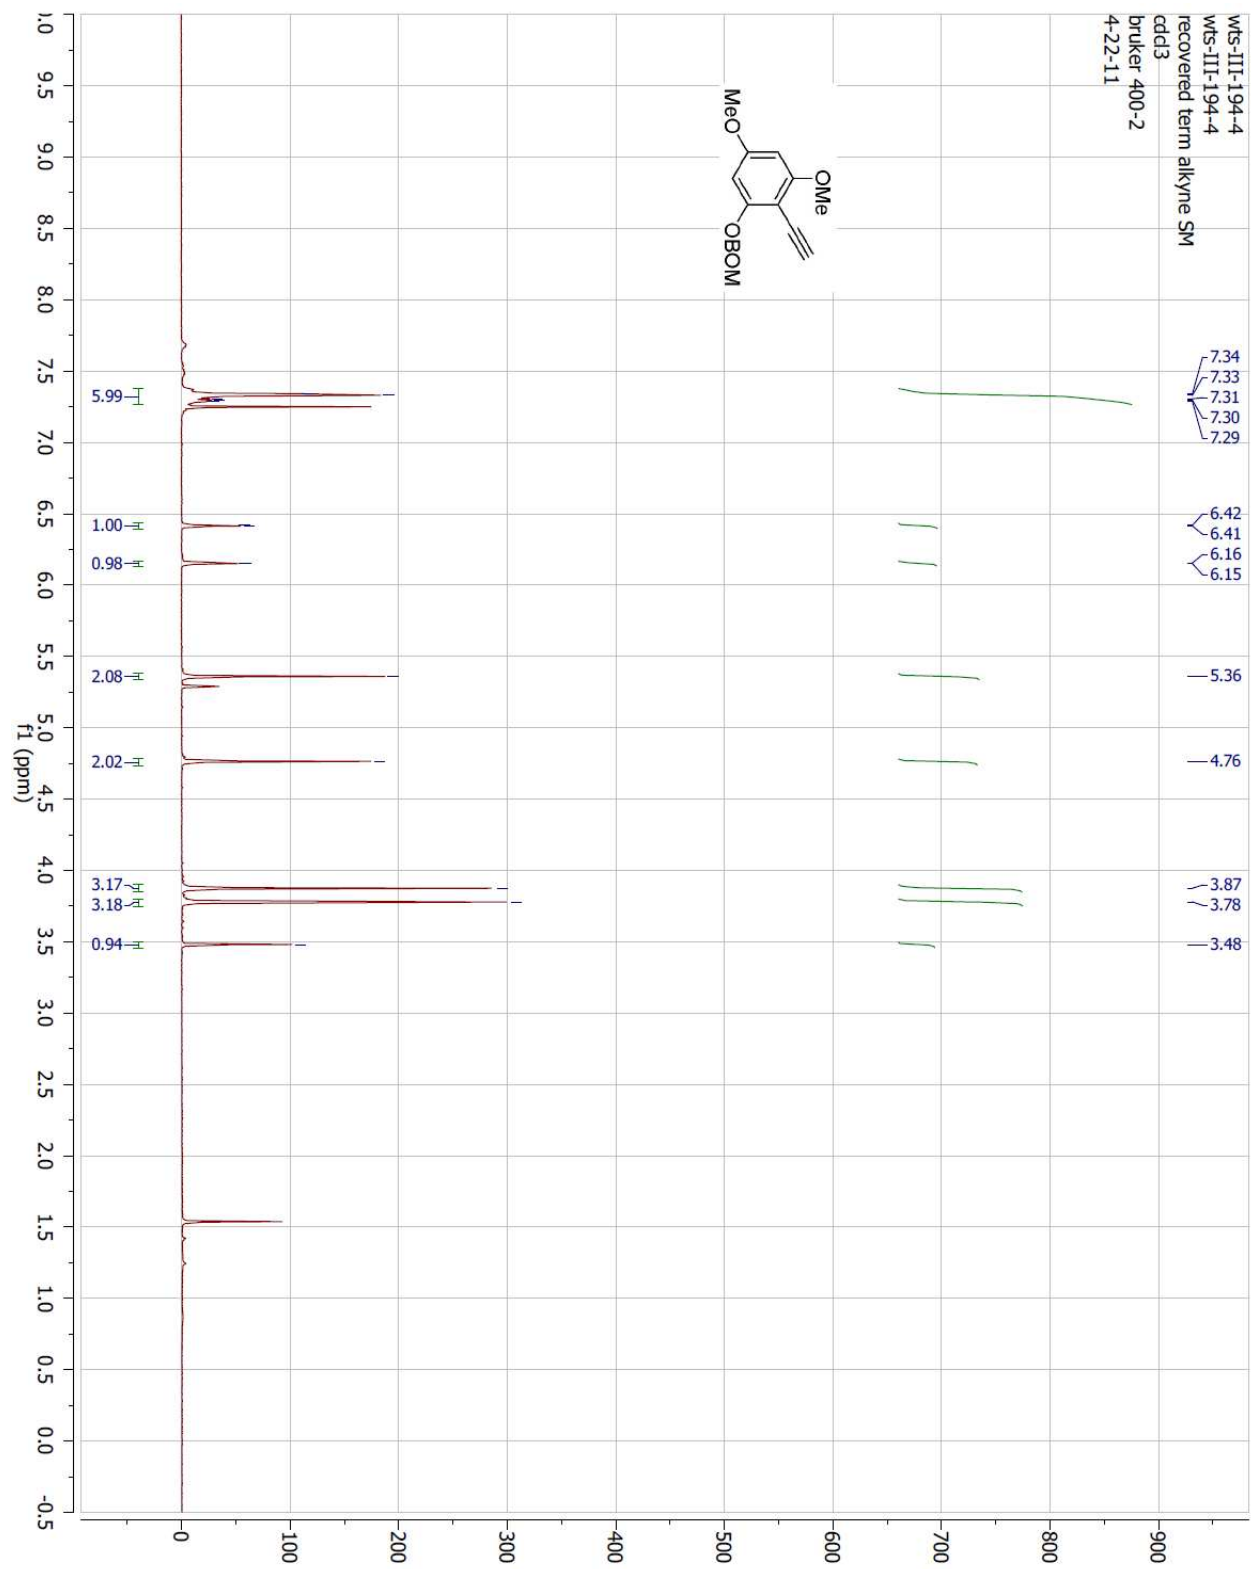

# Compound 8b

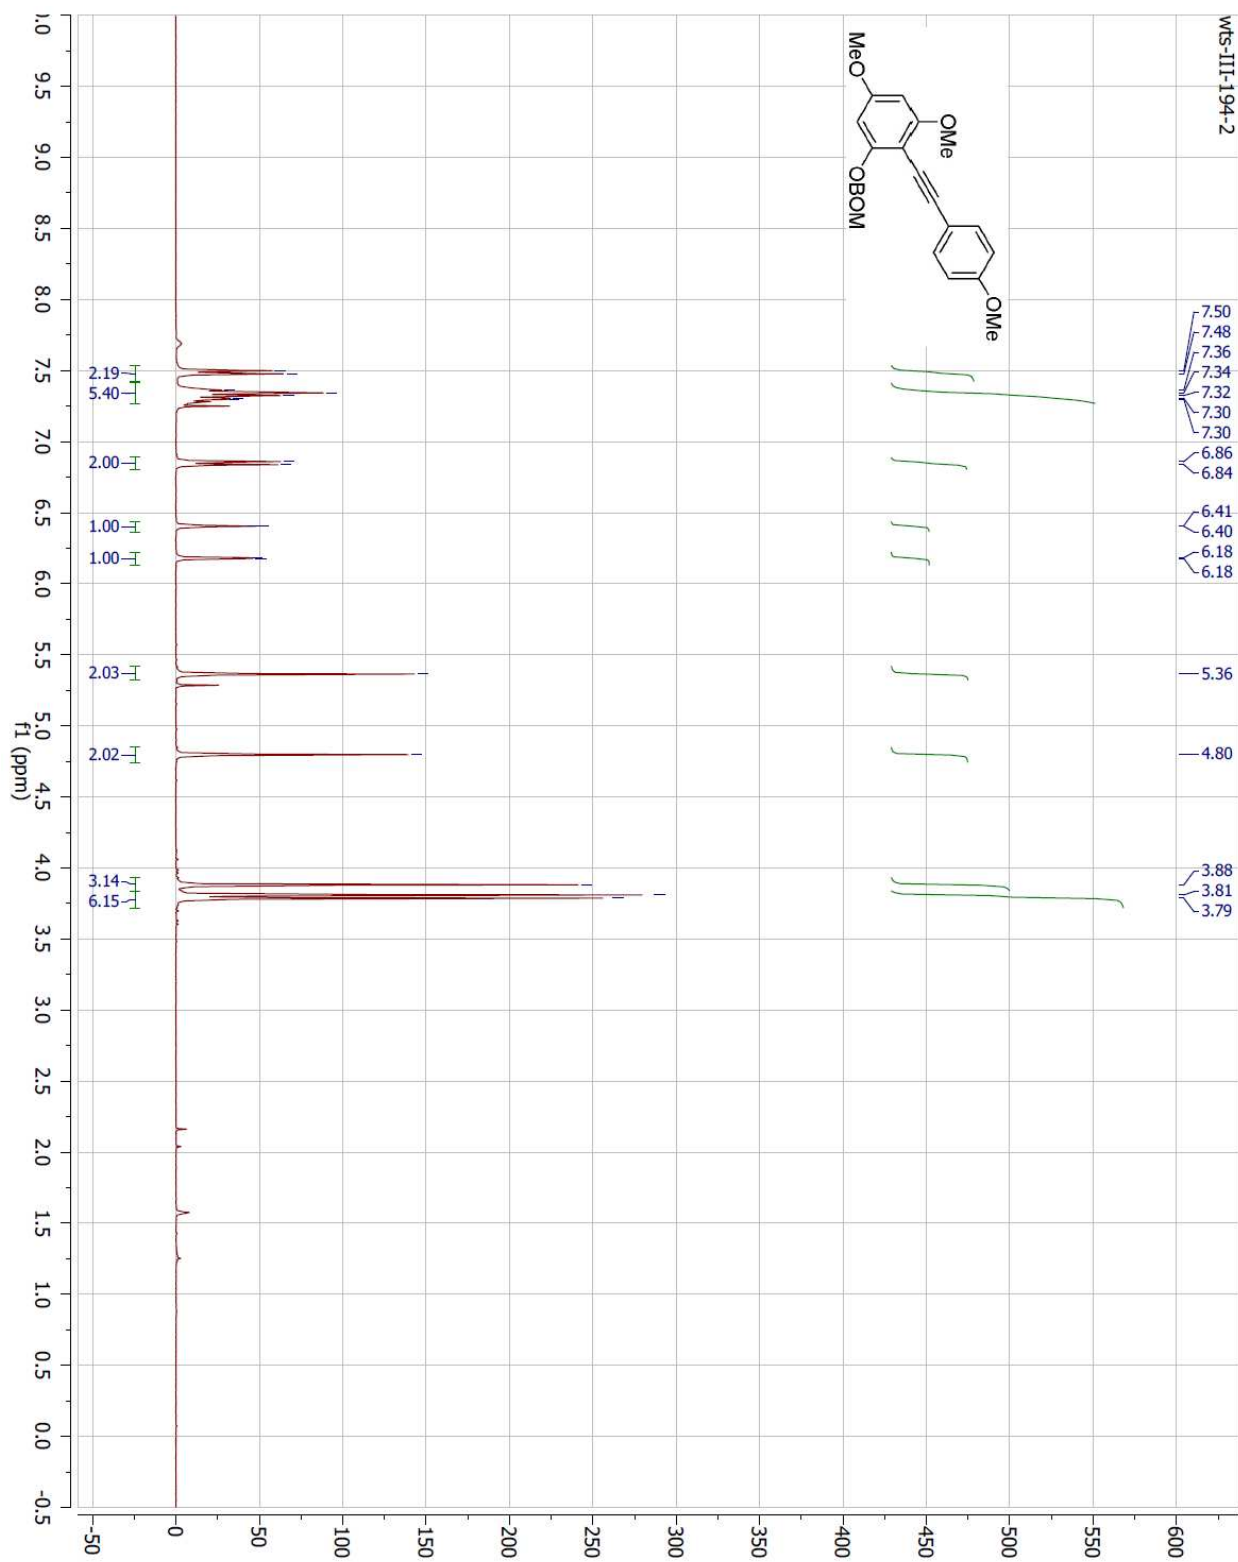

# Compound 8b

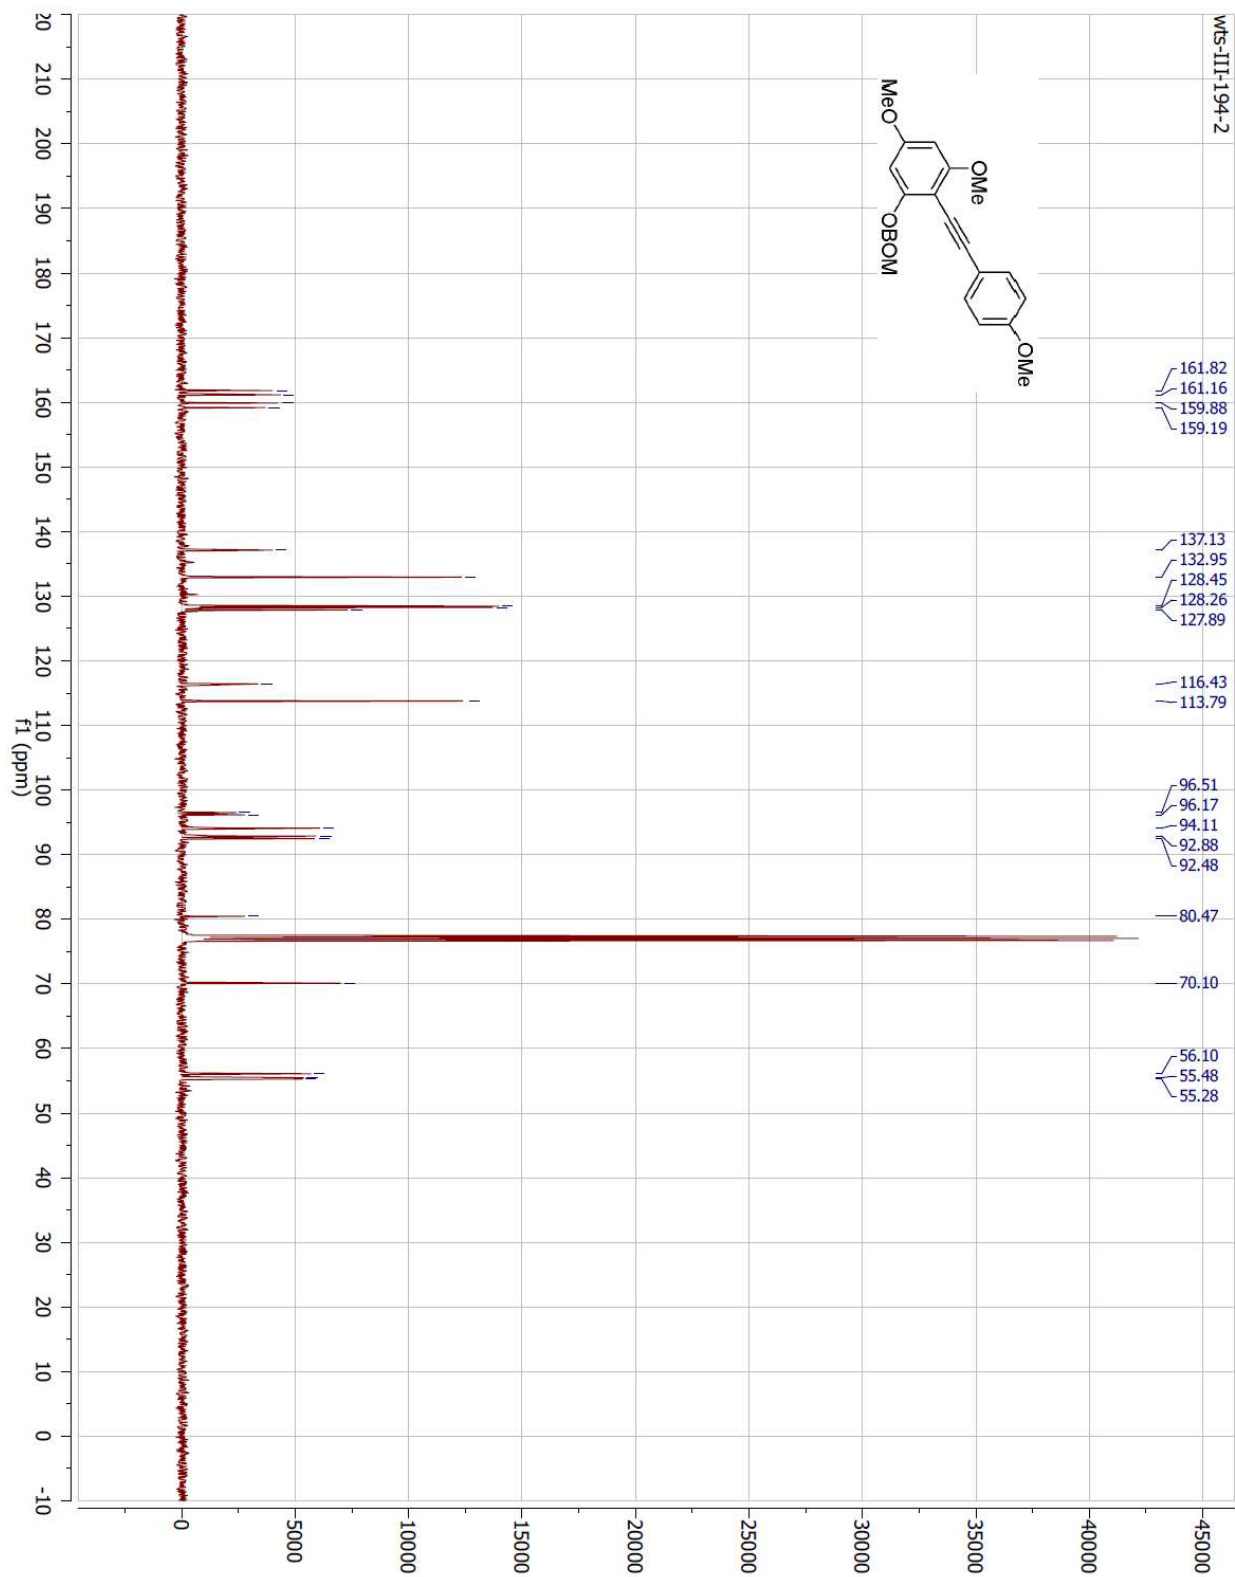

# Compound 9

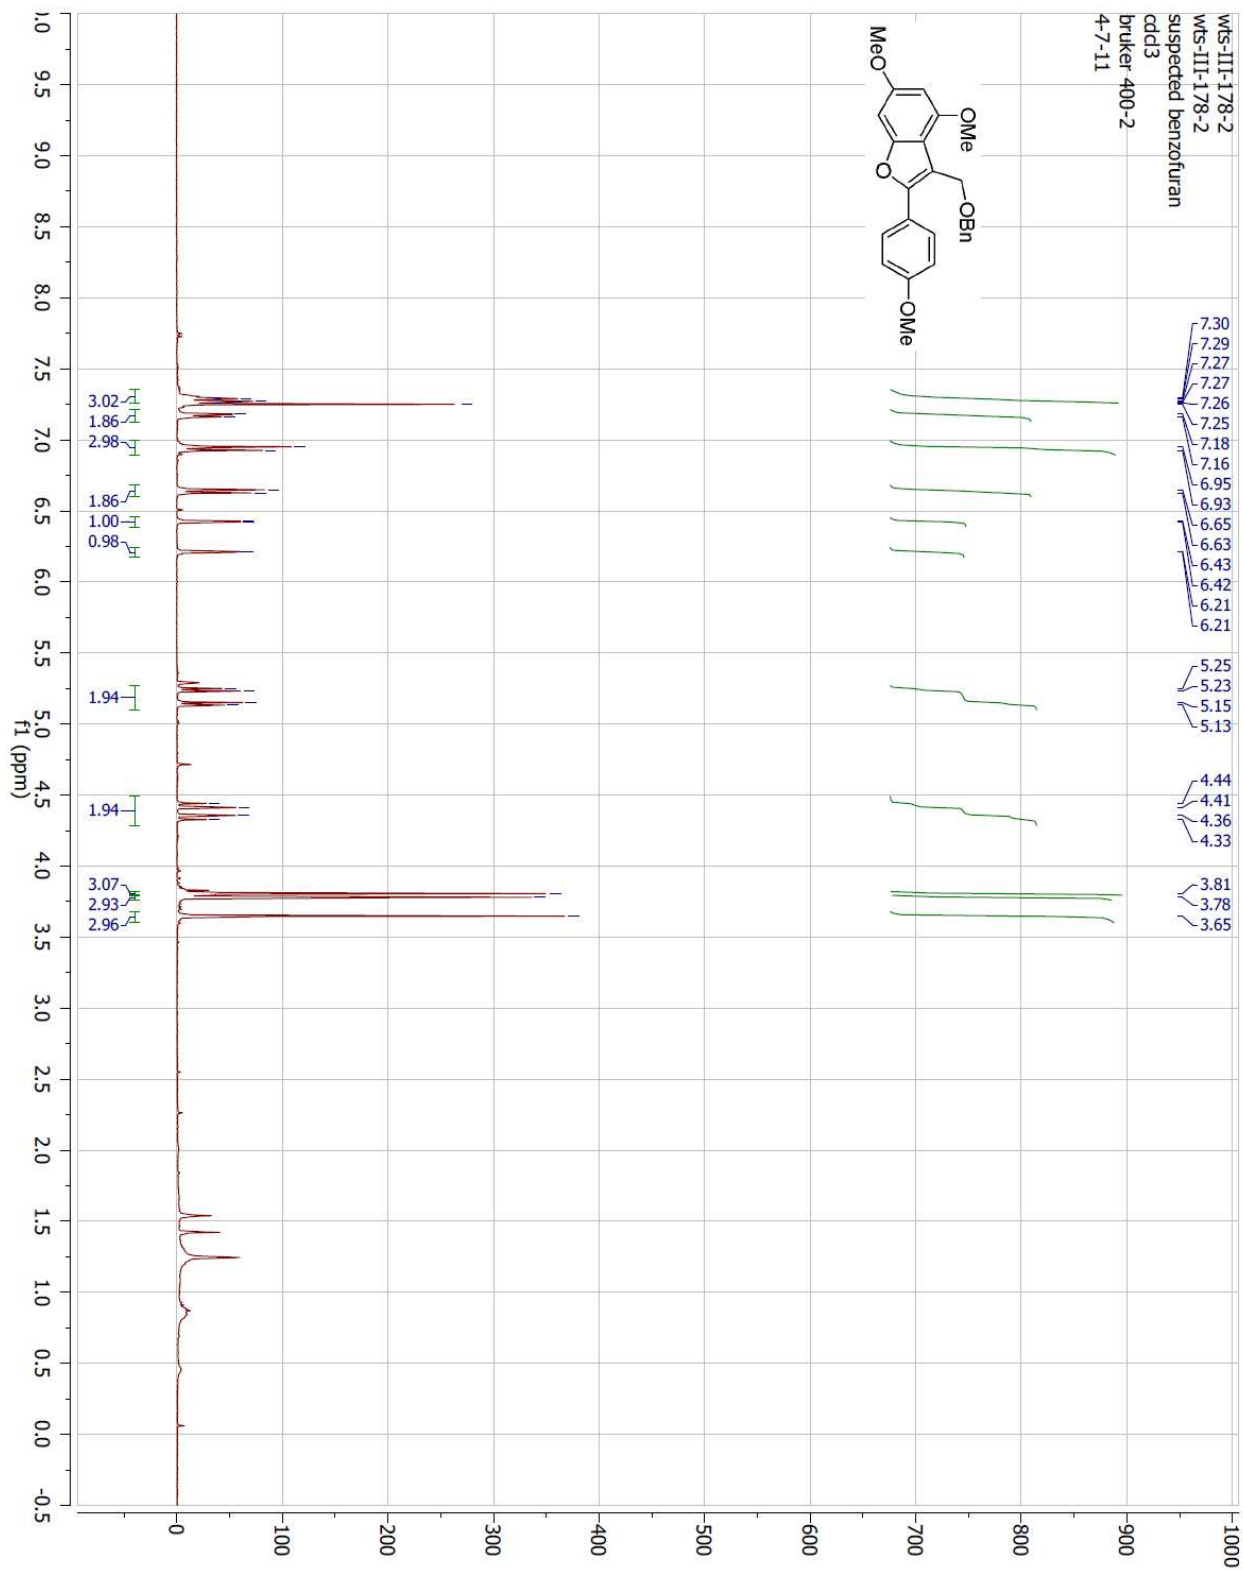

# Compound 9

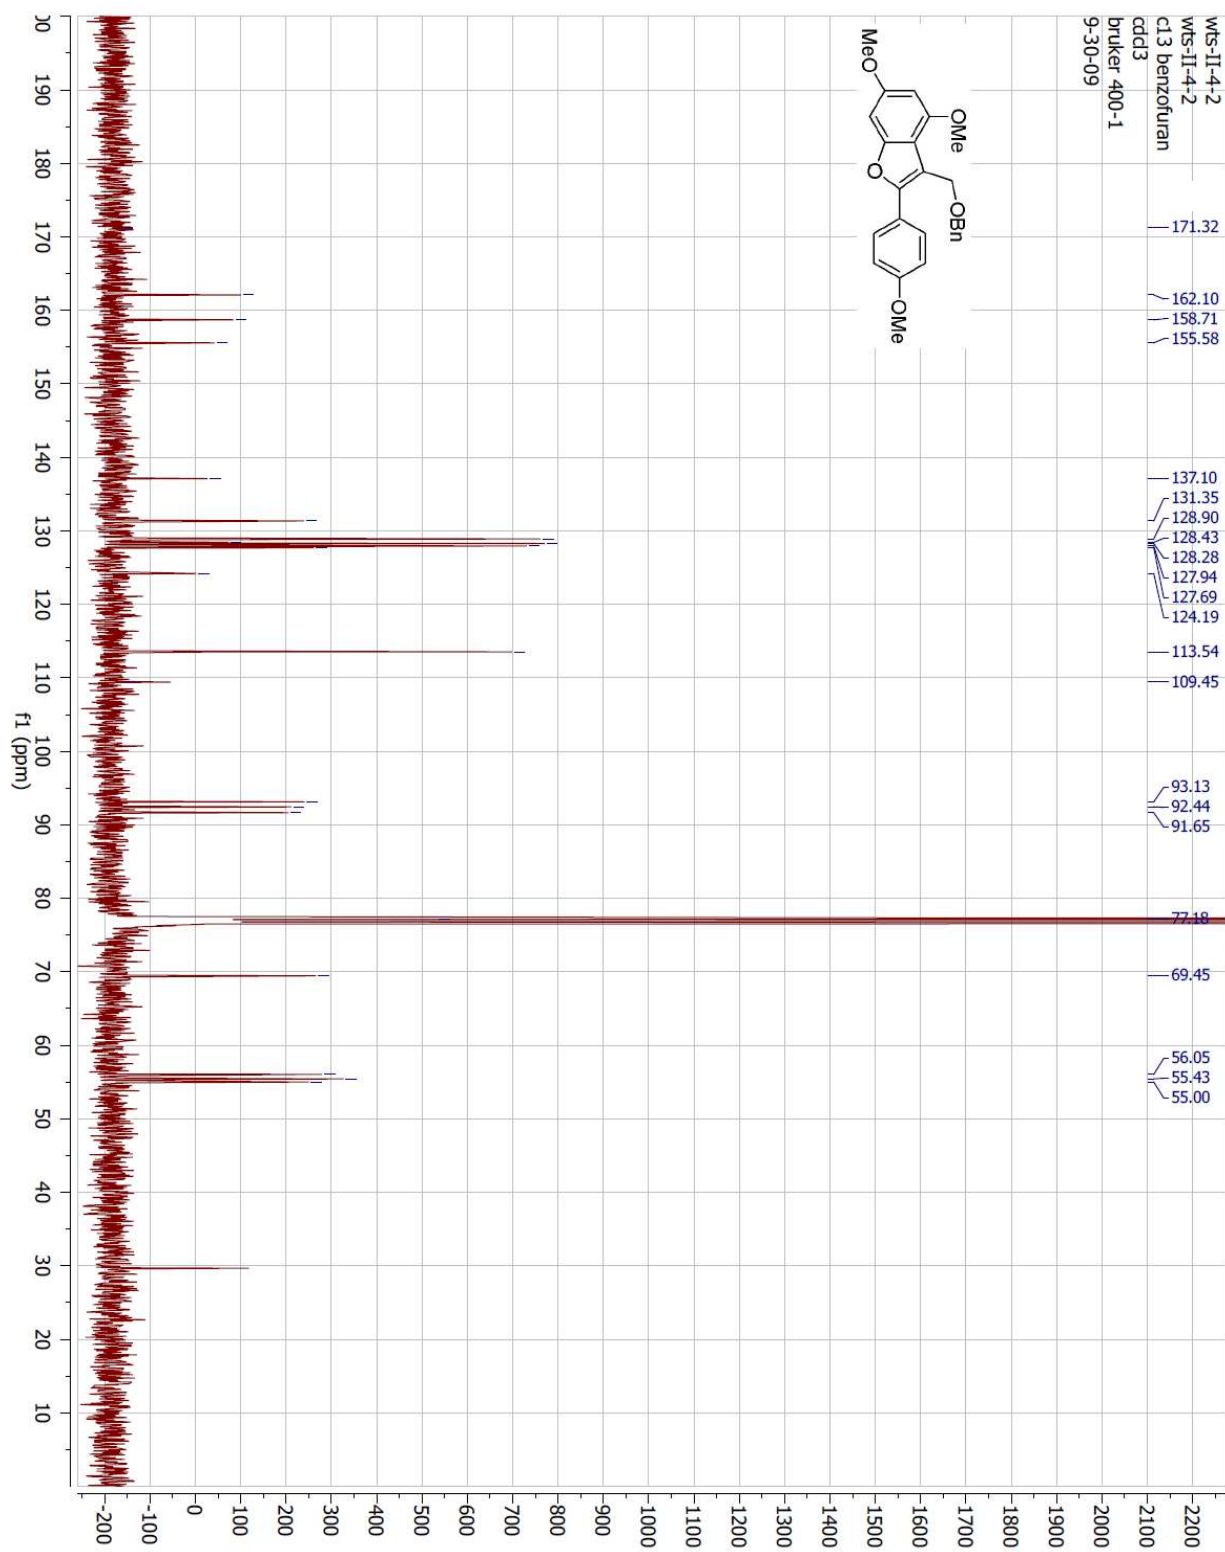



# 2-hydroxy-2-(4-methoxyphenyl)acetonitrile

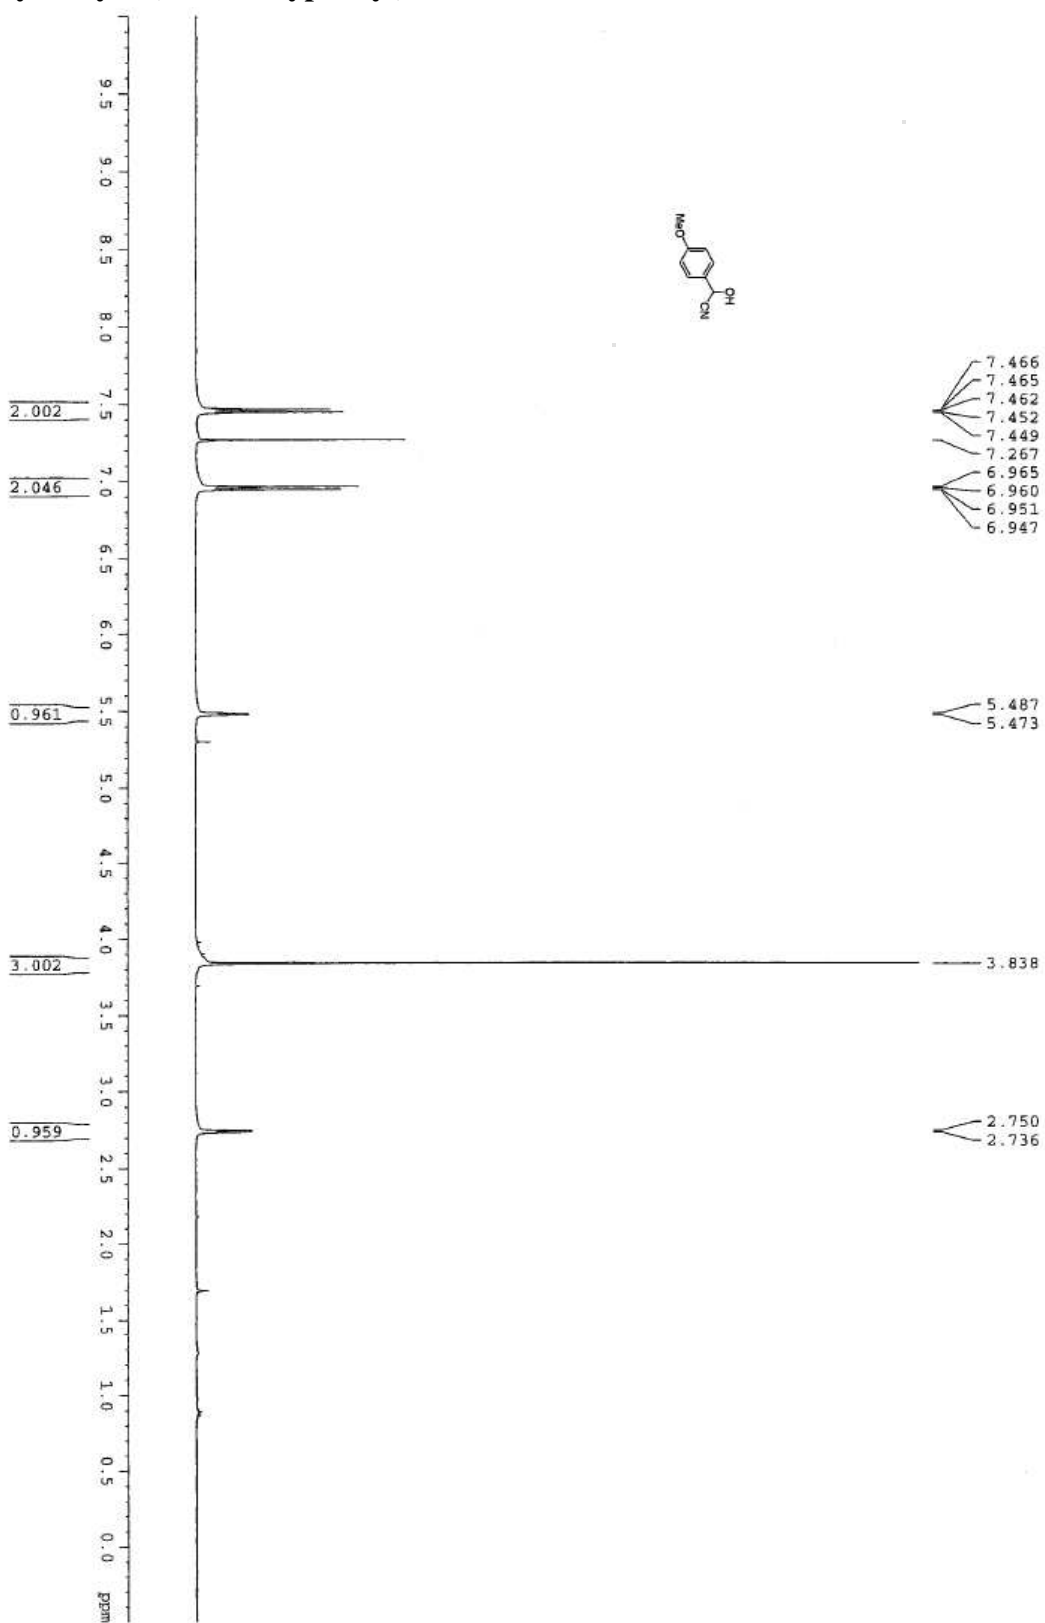

Compound 10 Precursor then Compound 10

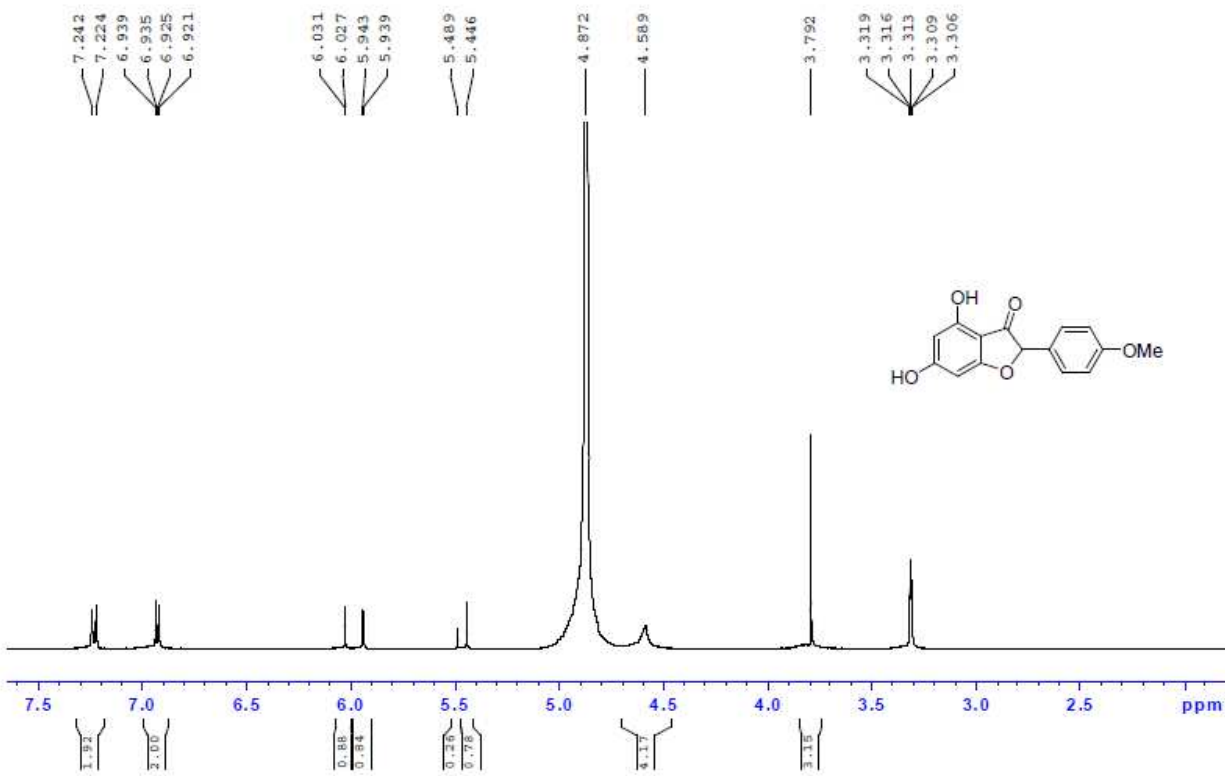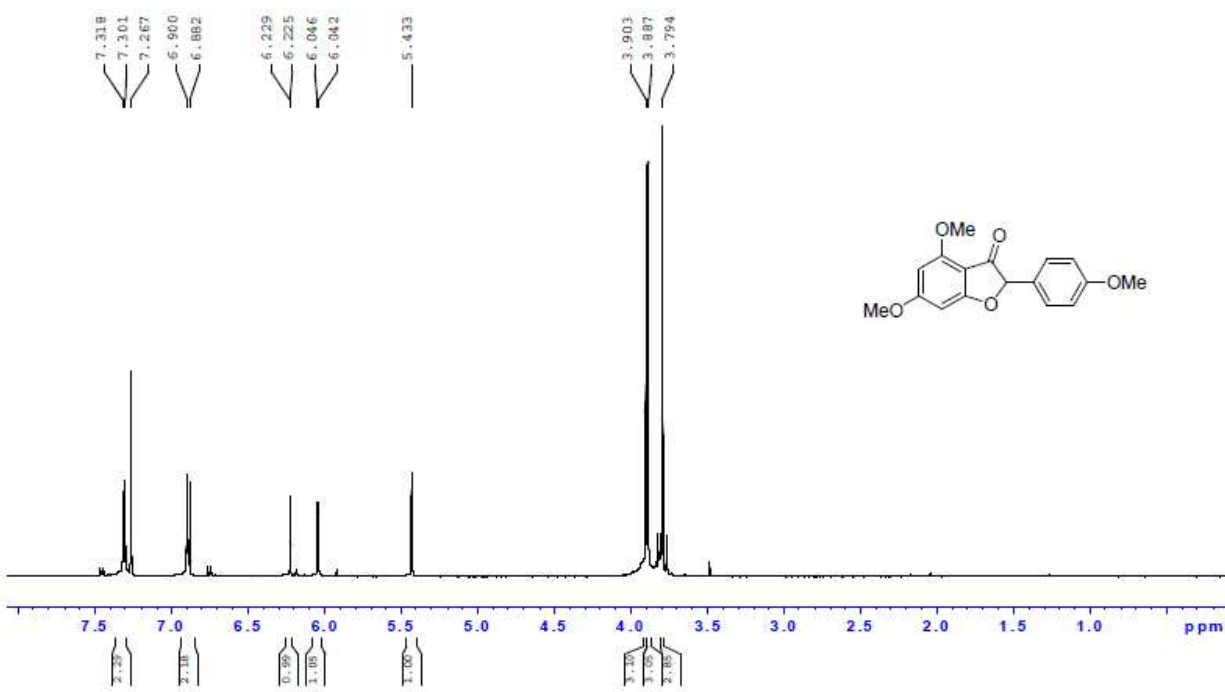

# Compound 11

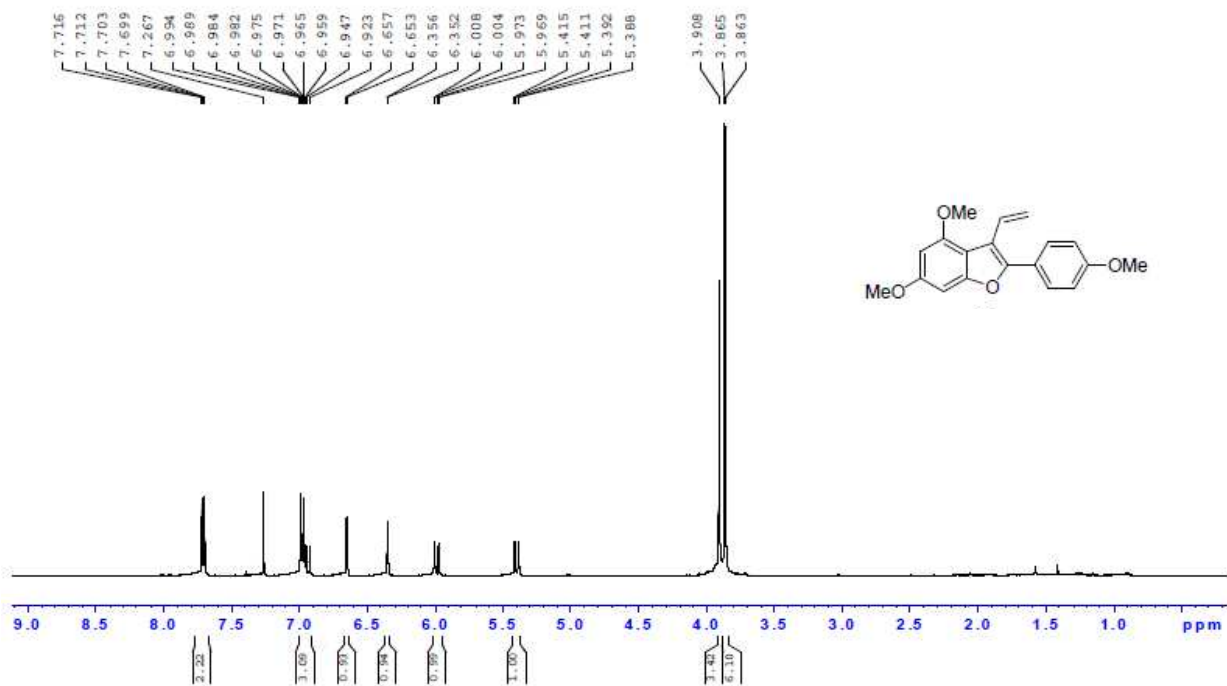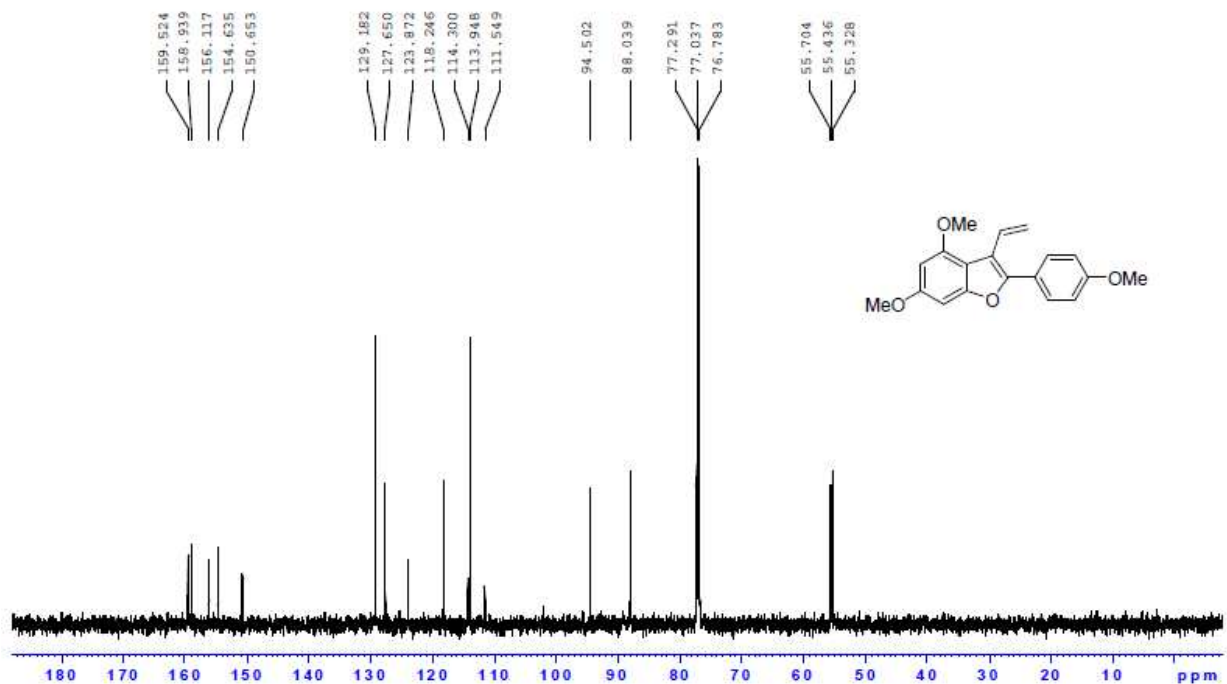

# Compound 12

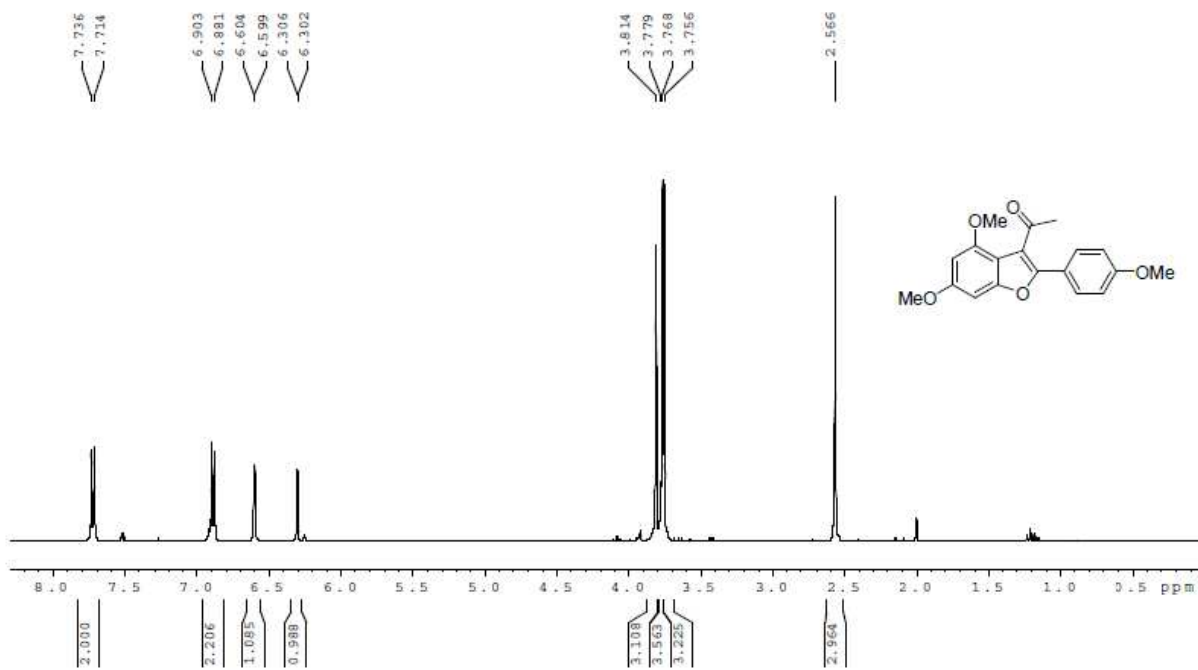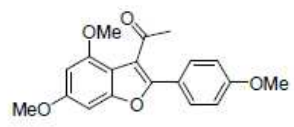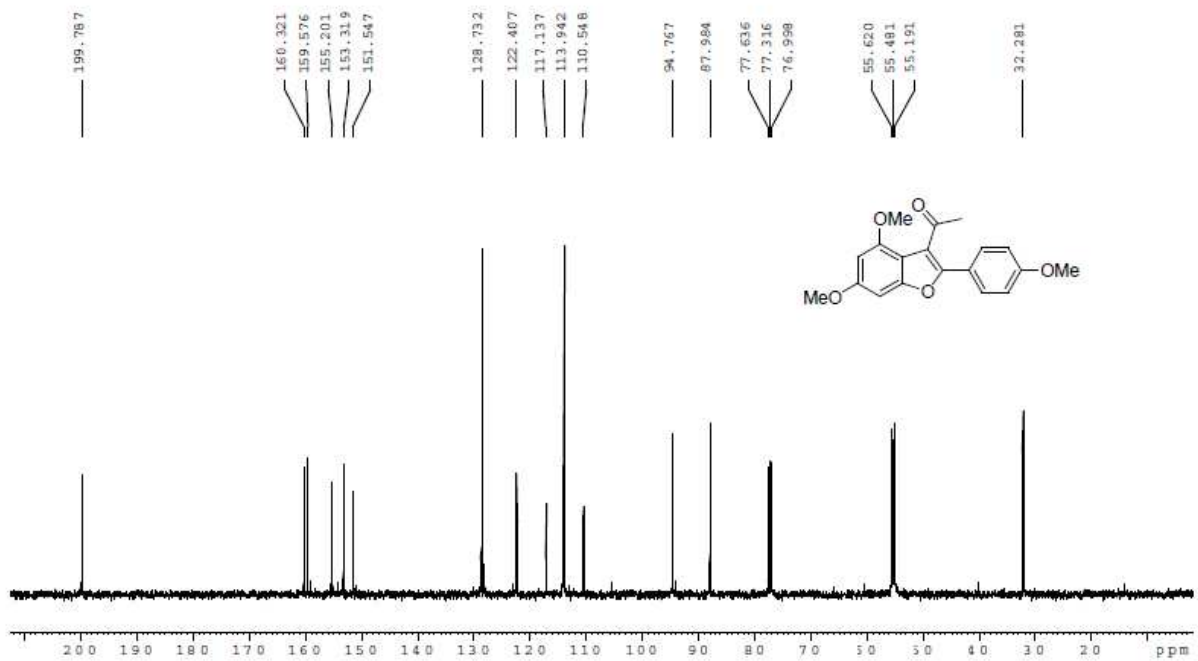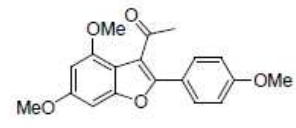

# Compound 13

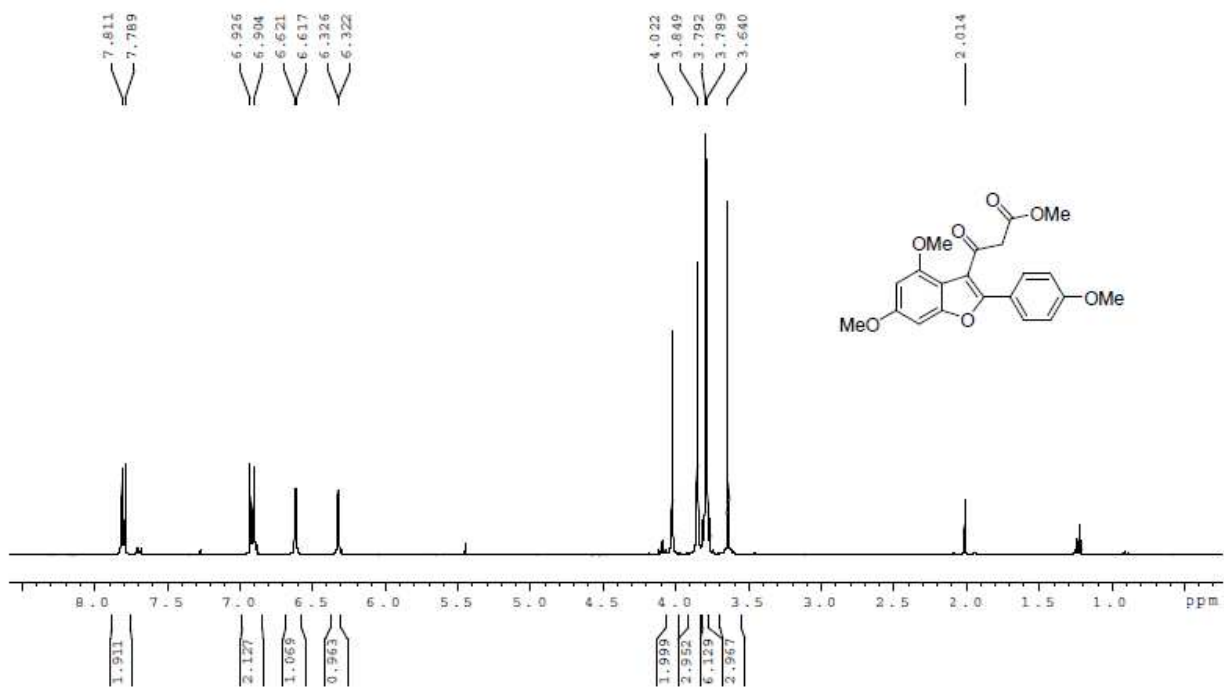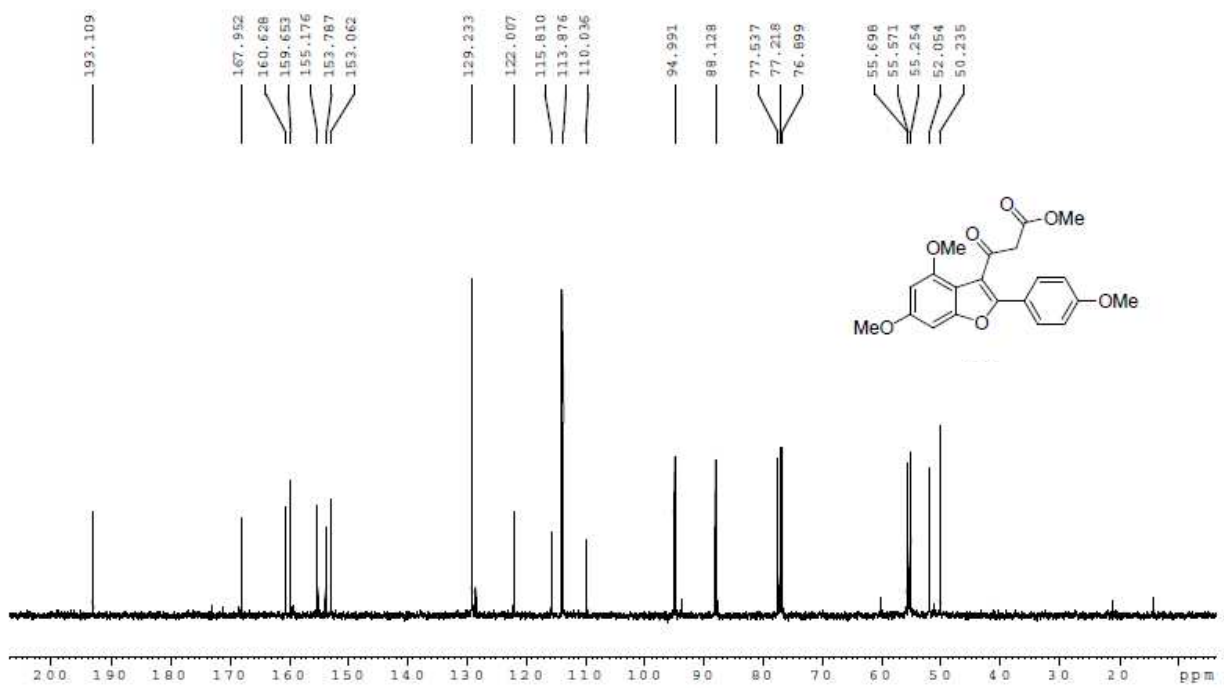

### Compound 3

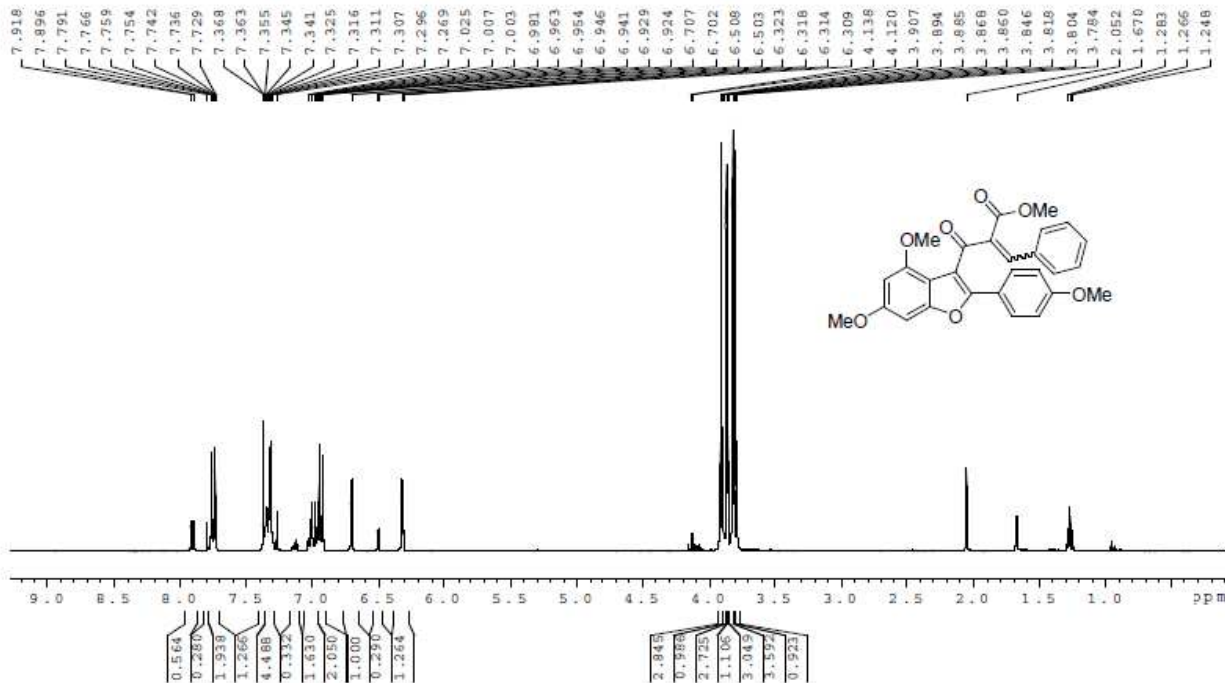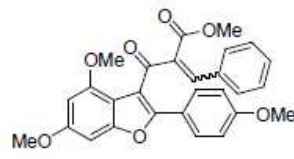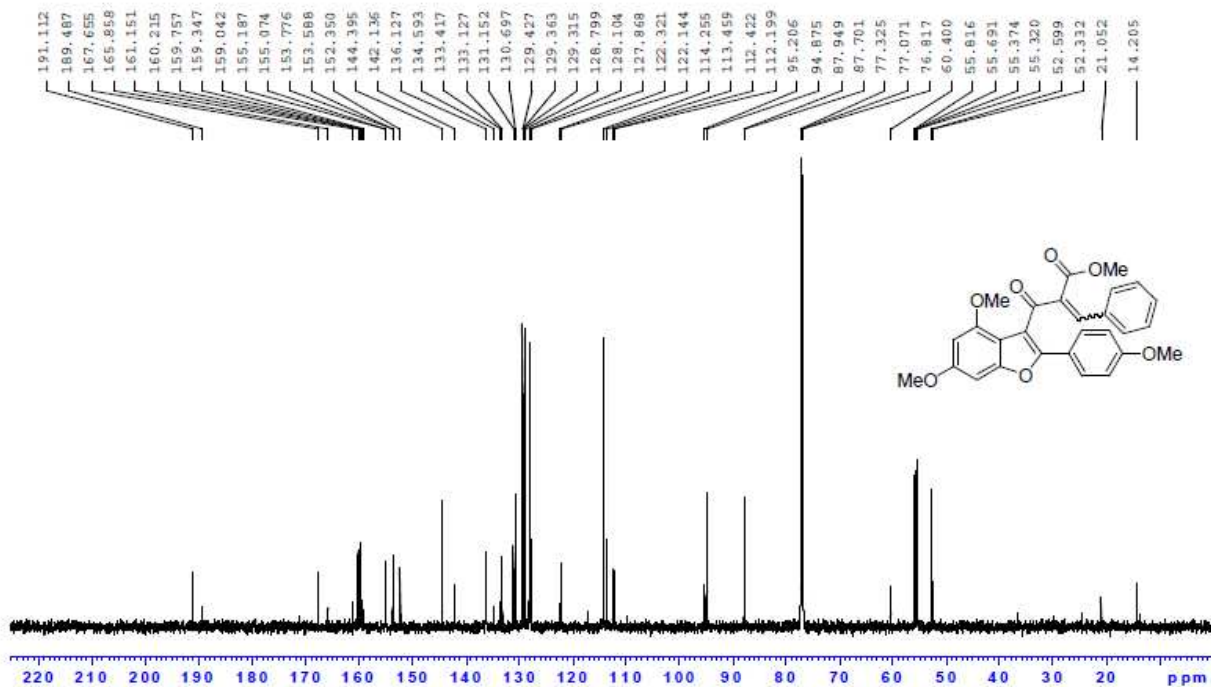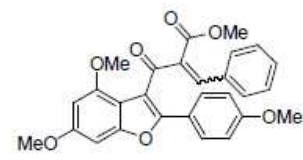

# Compound 16

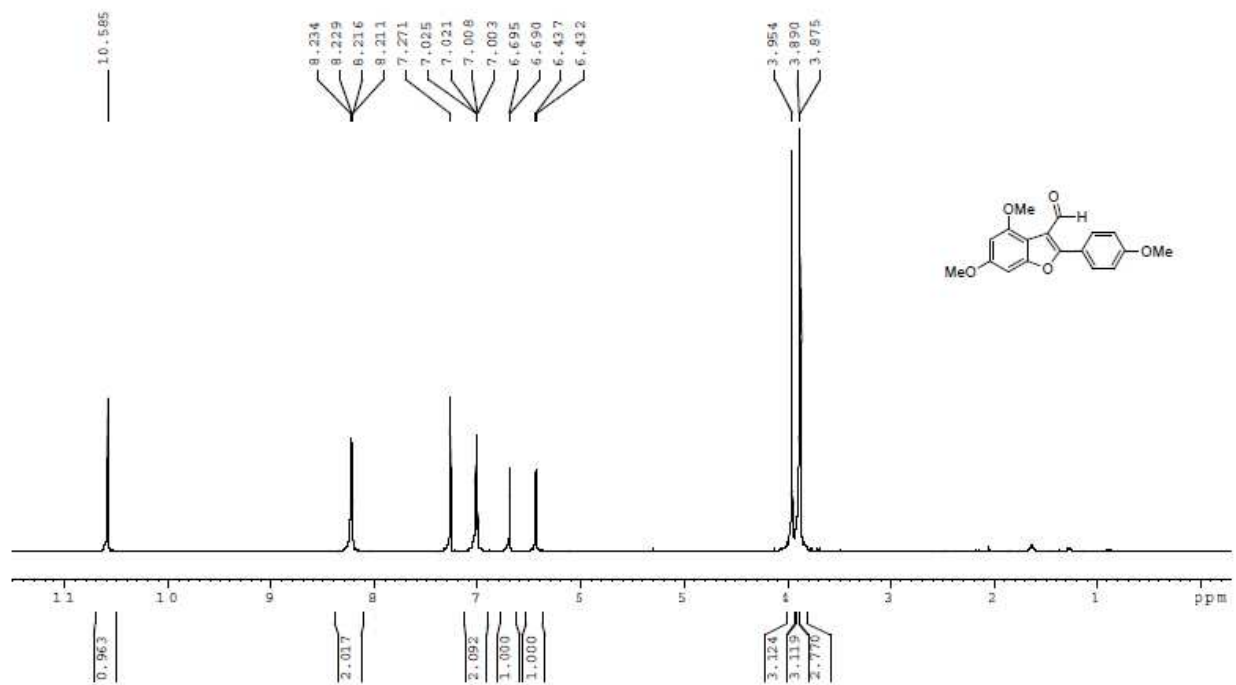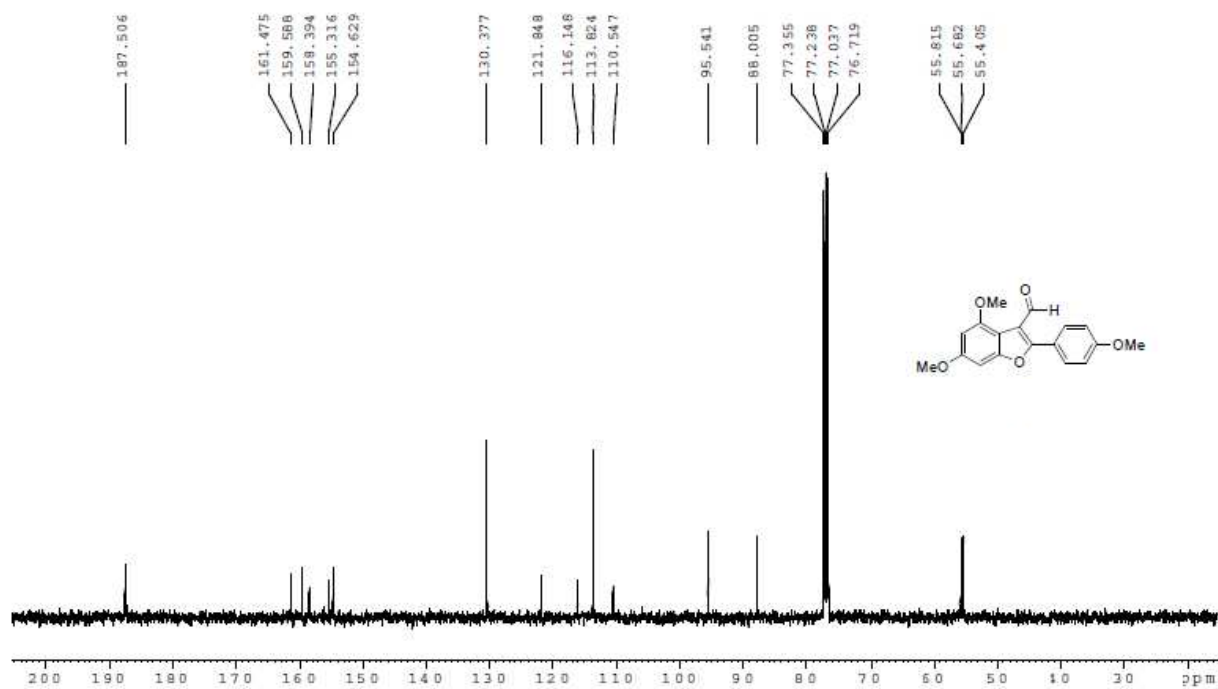

# Compound 17a

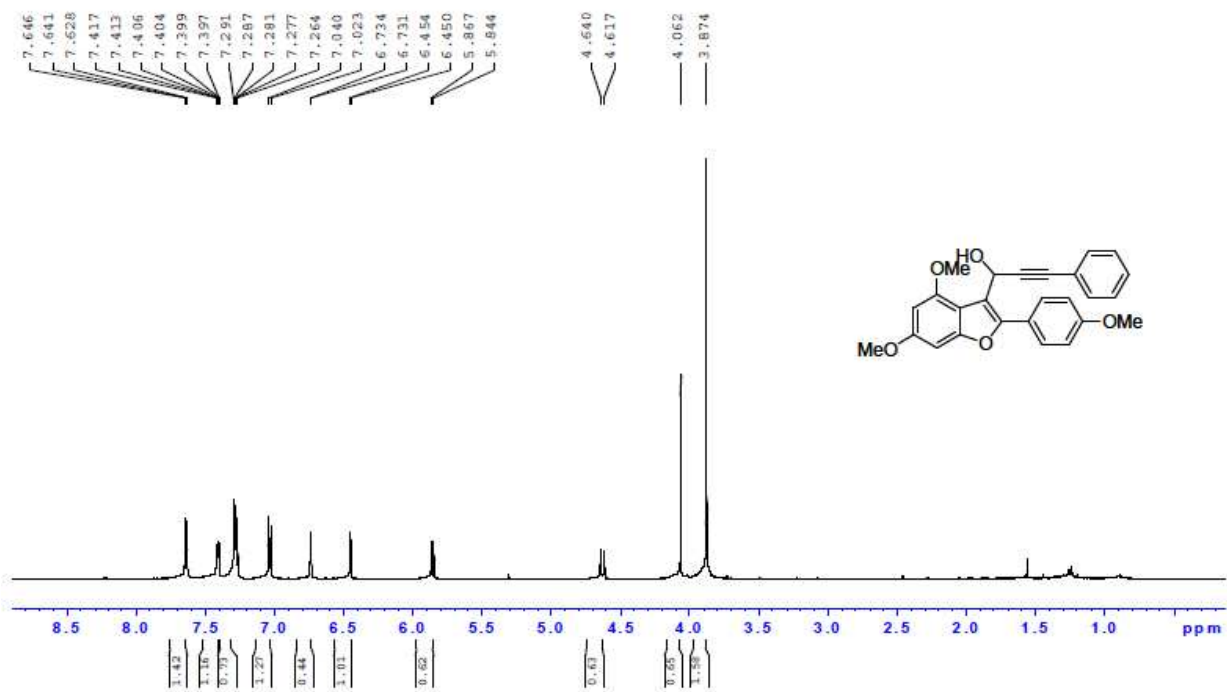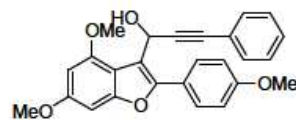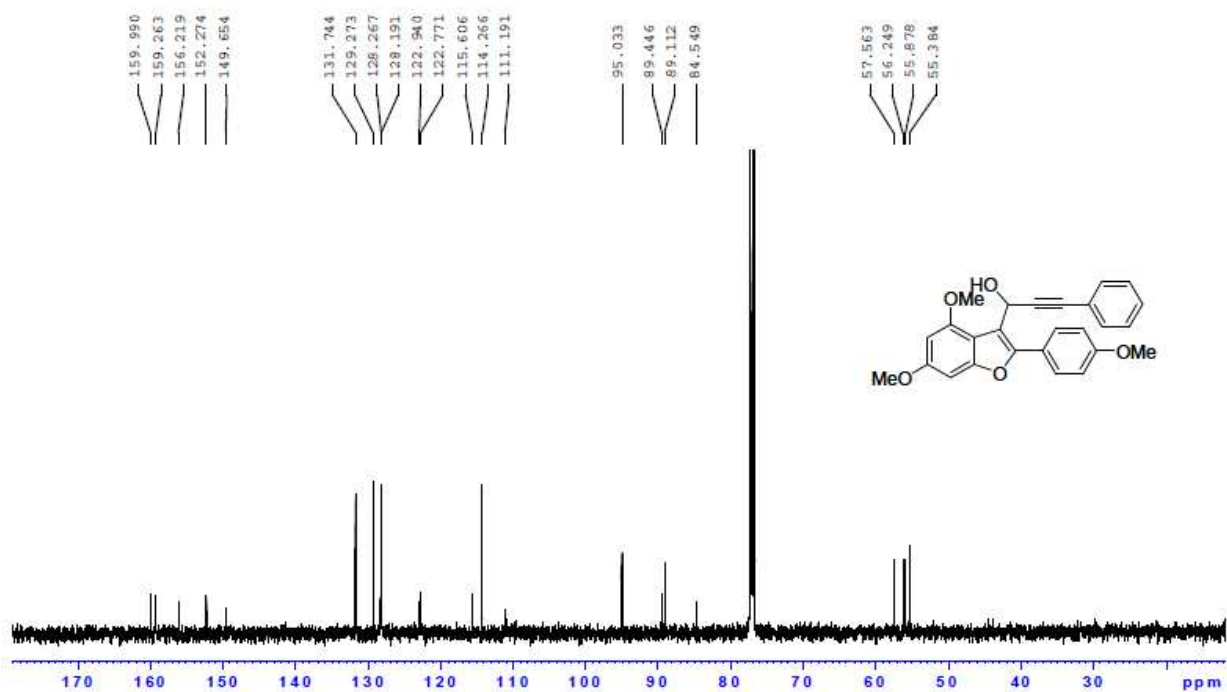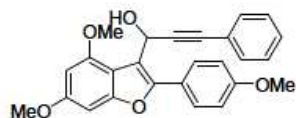



# Compound 18a

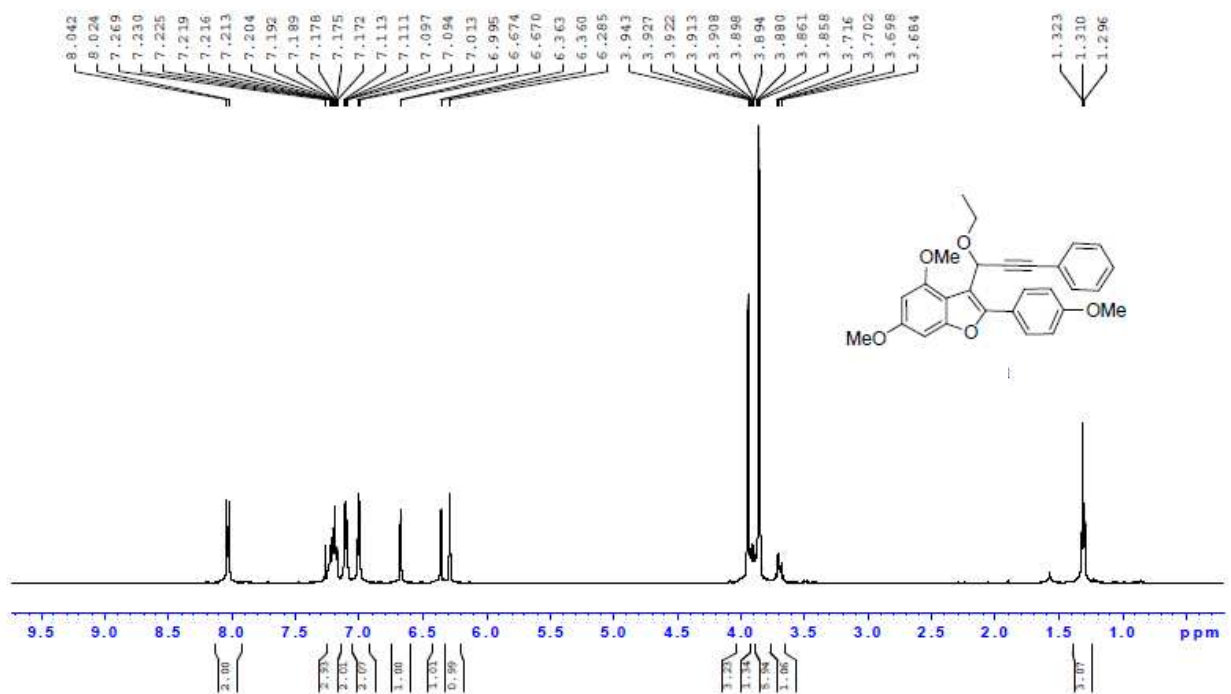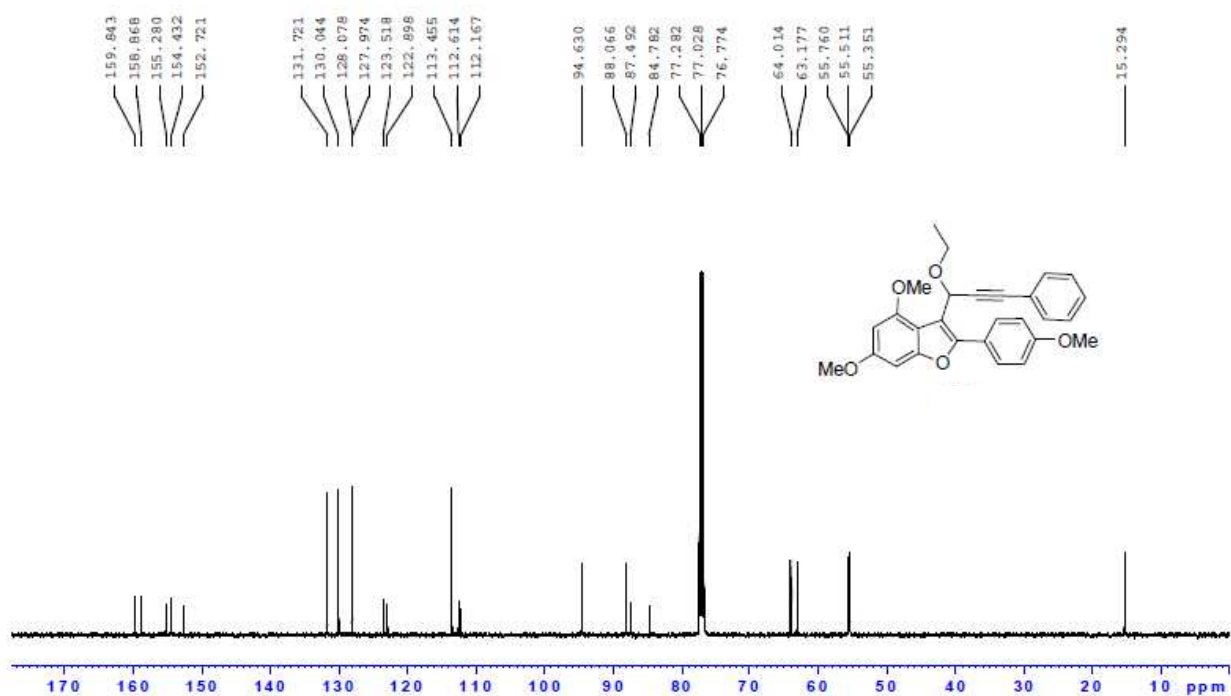

# Compound 18b

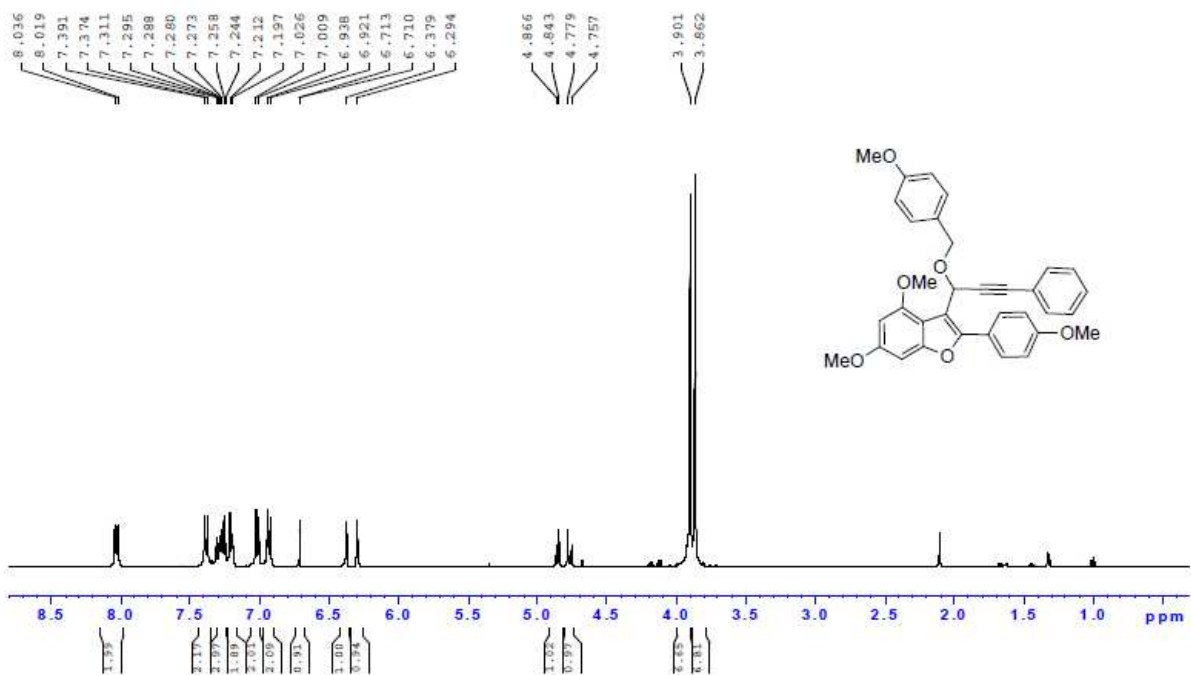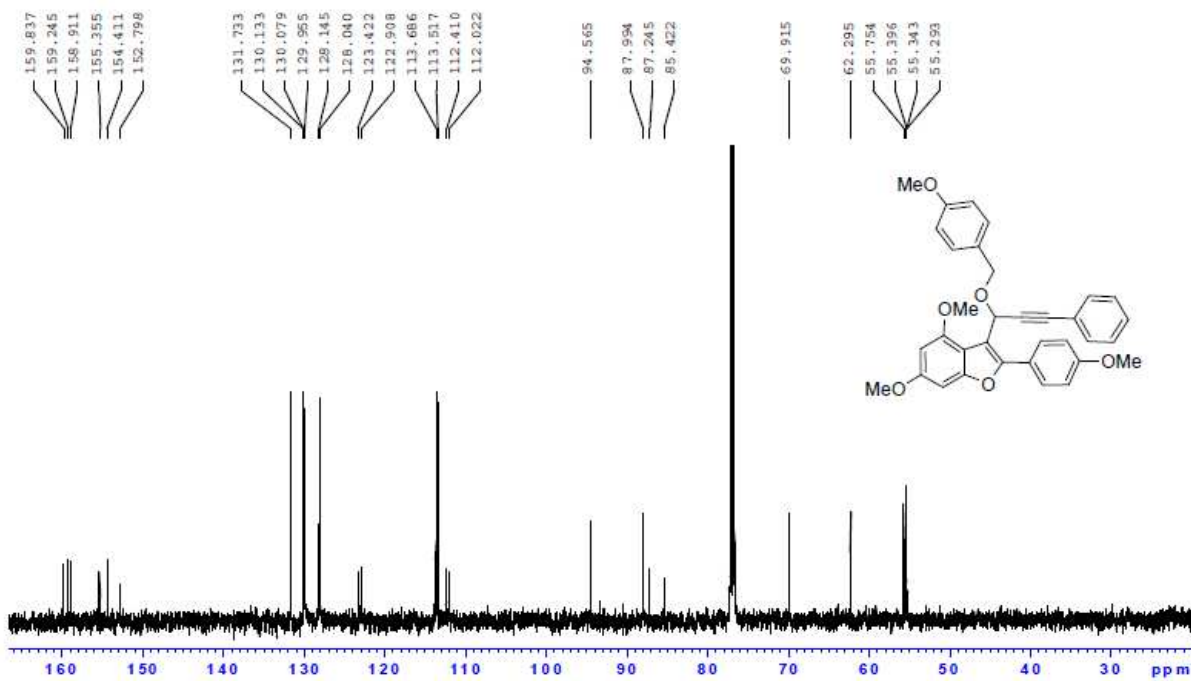

# Compound 18c

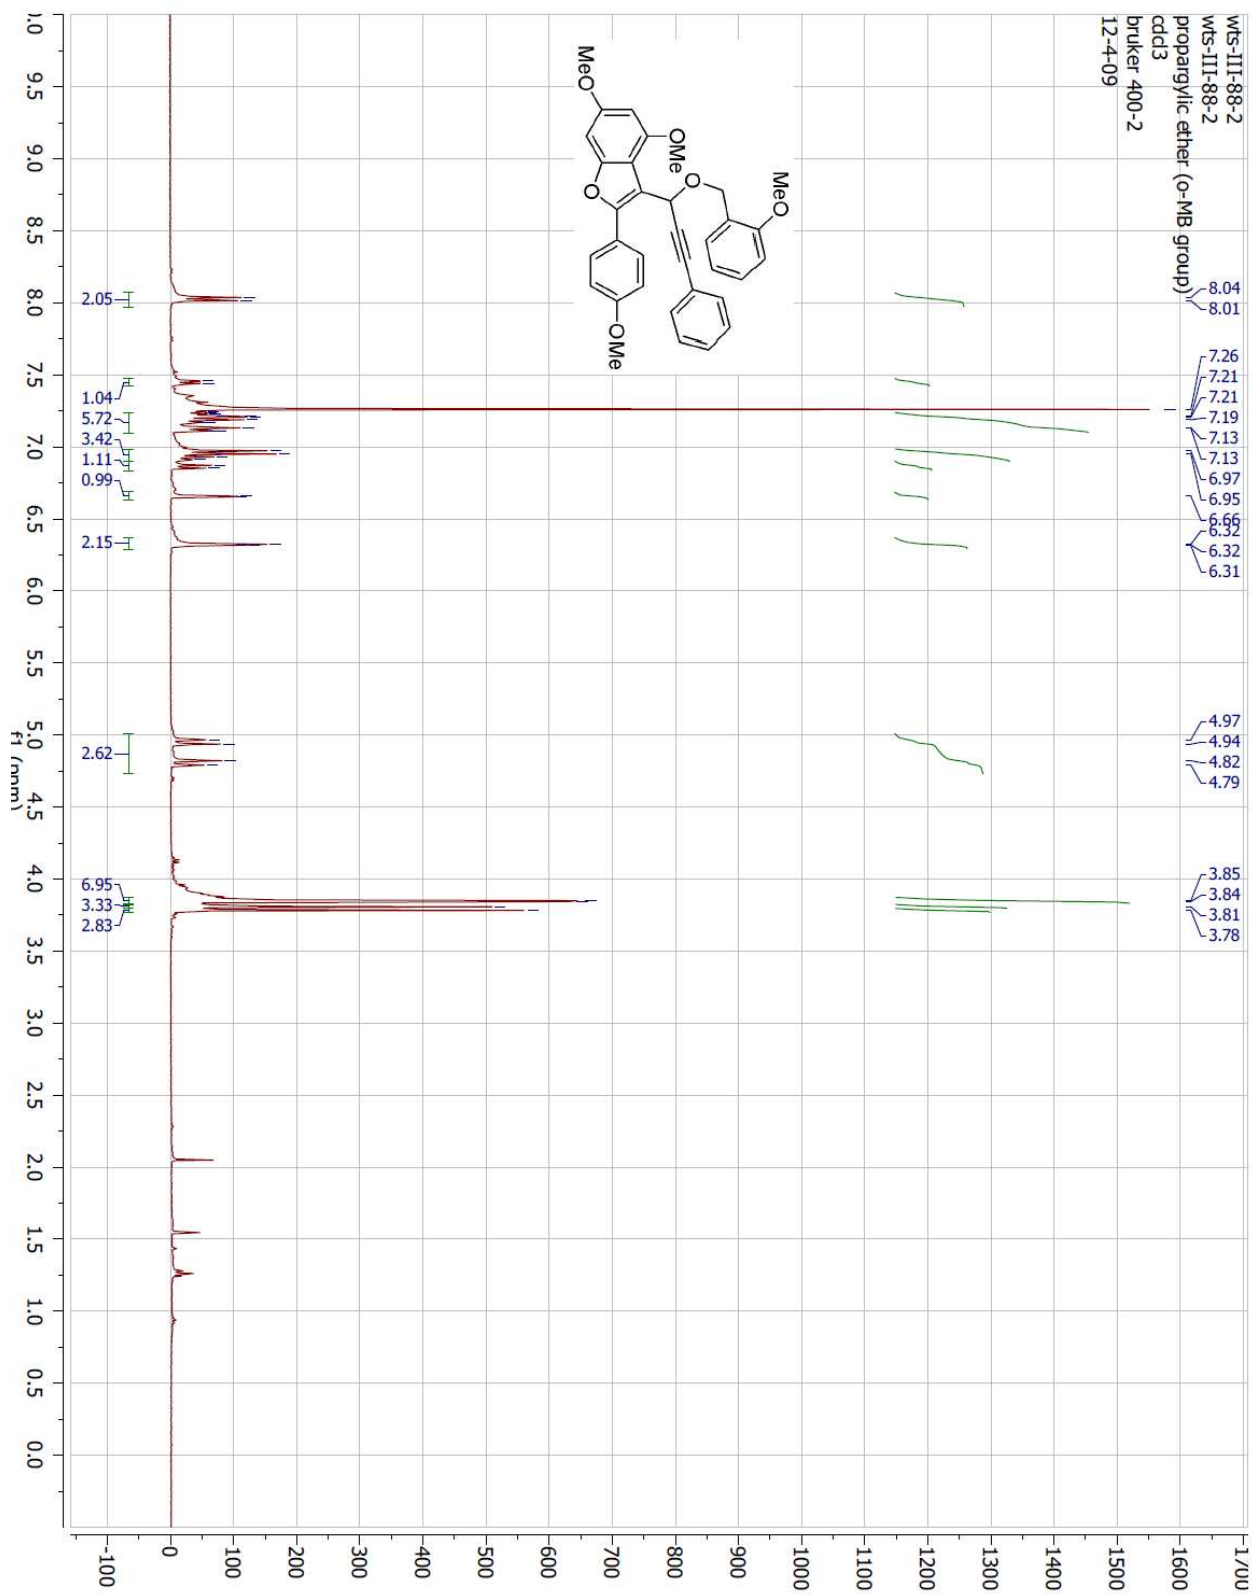

# Compound 18c

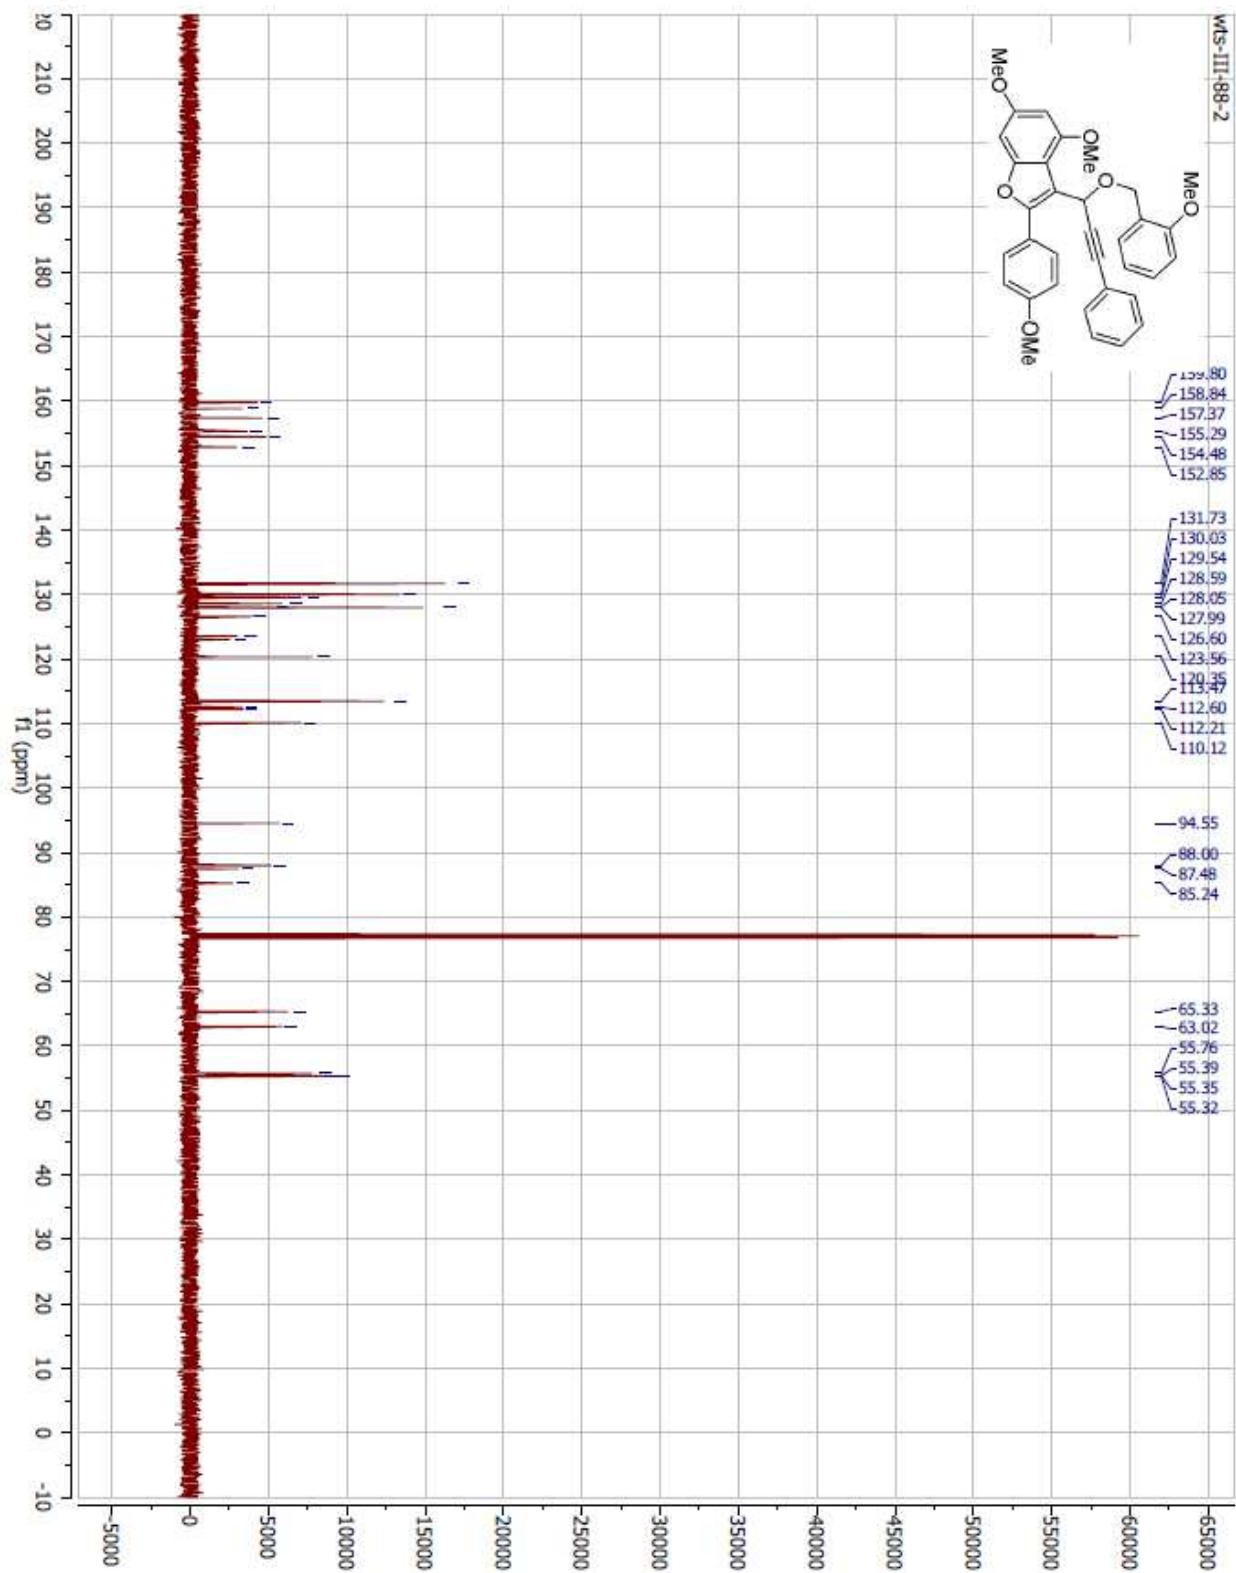

# Compound 17b

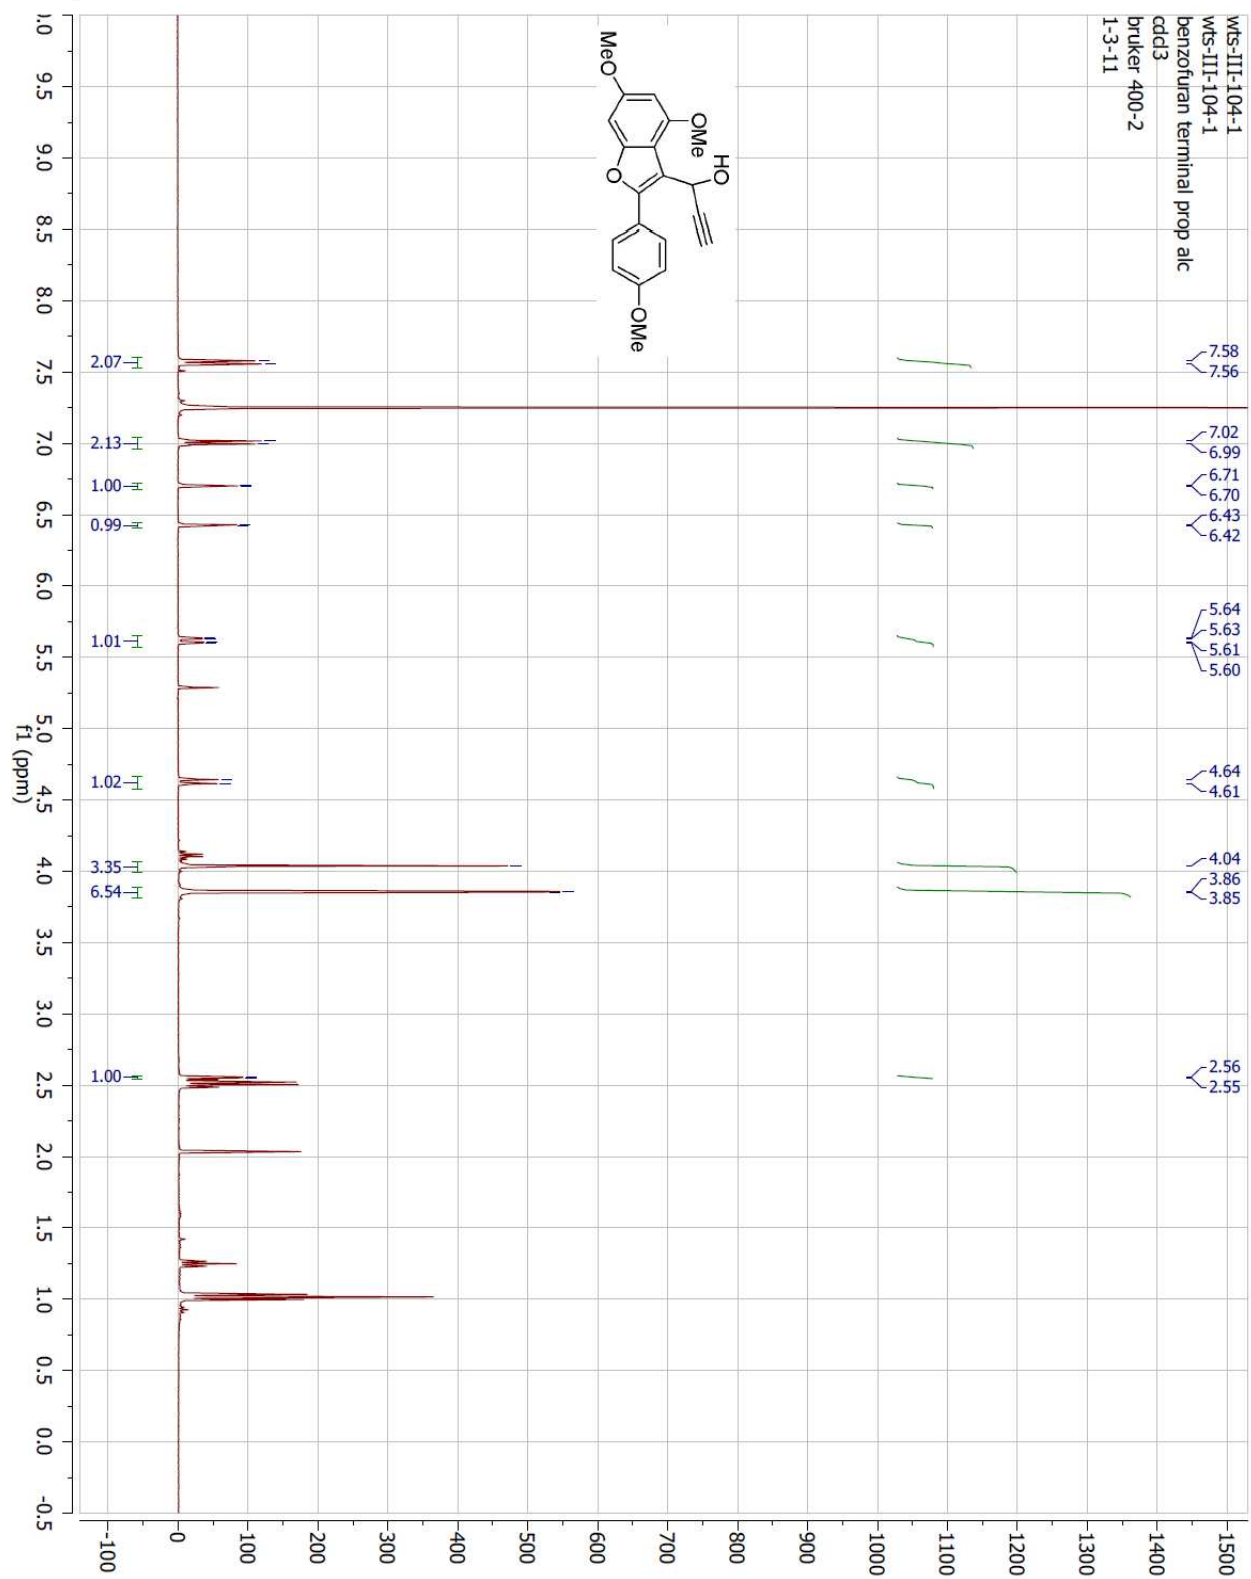

# Compound 18d

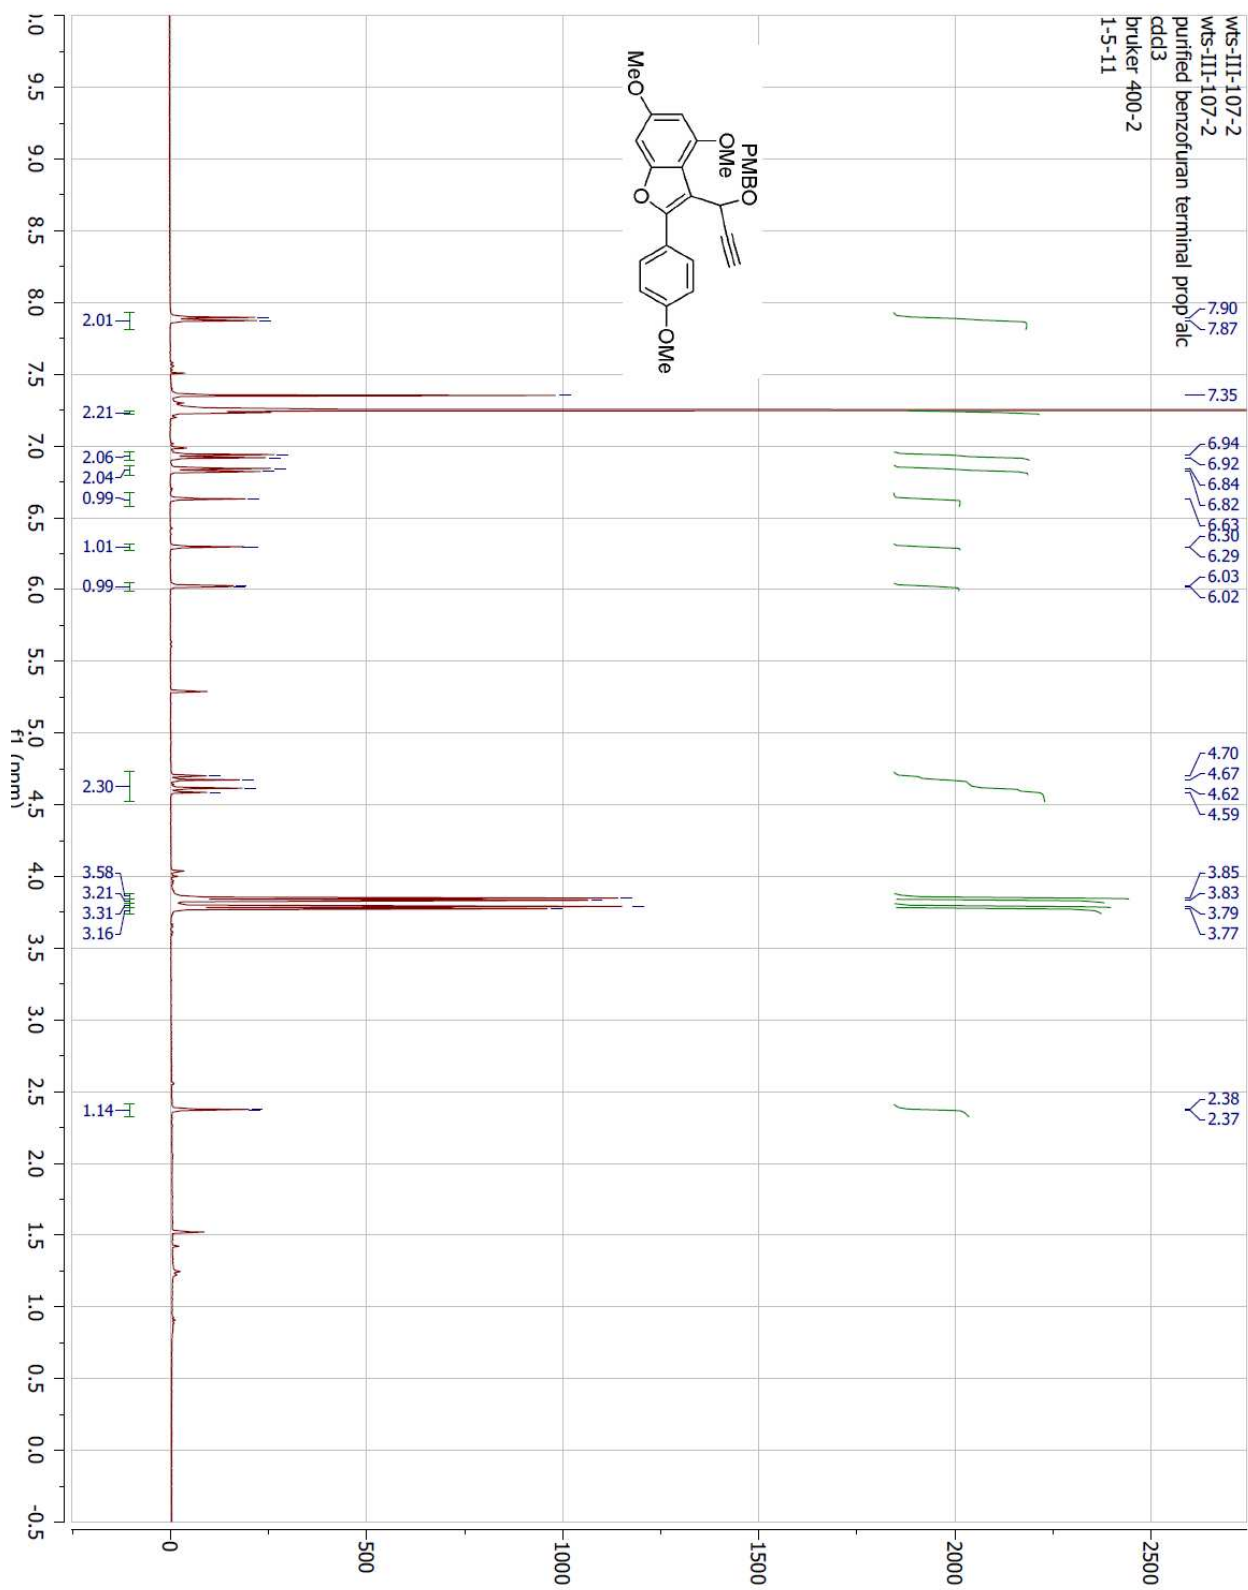

# Compound 18d

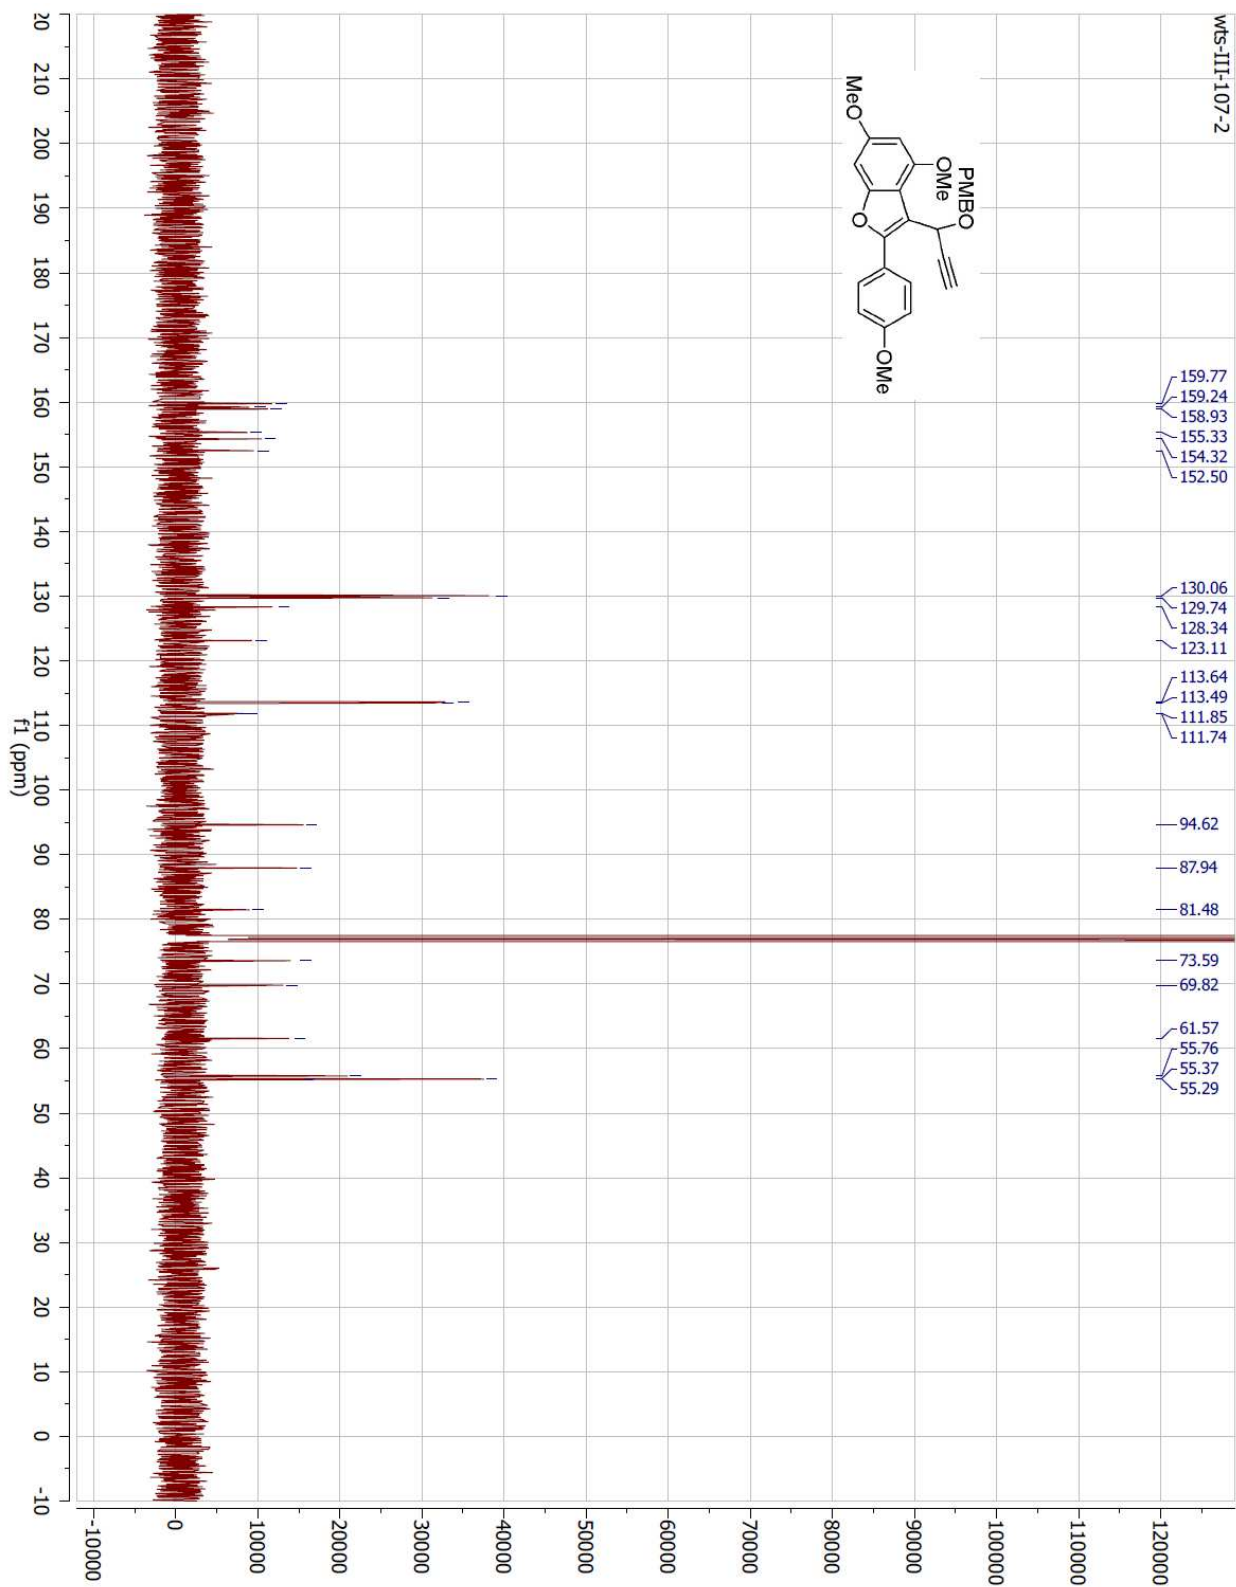

# Compound 19a

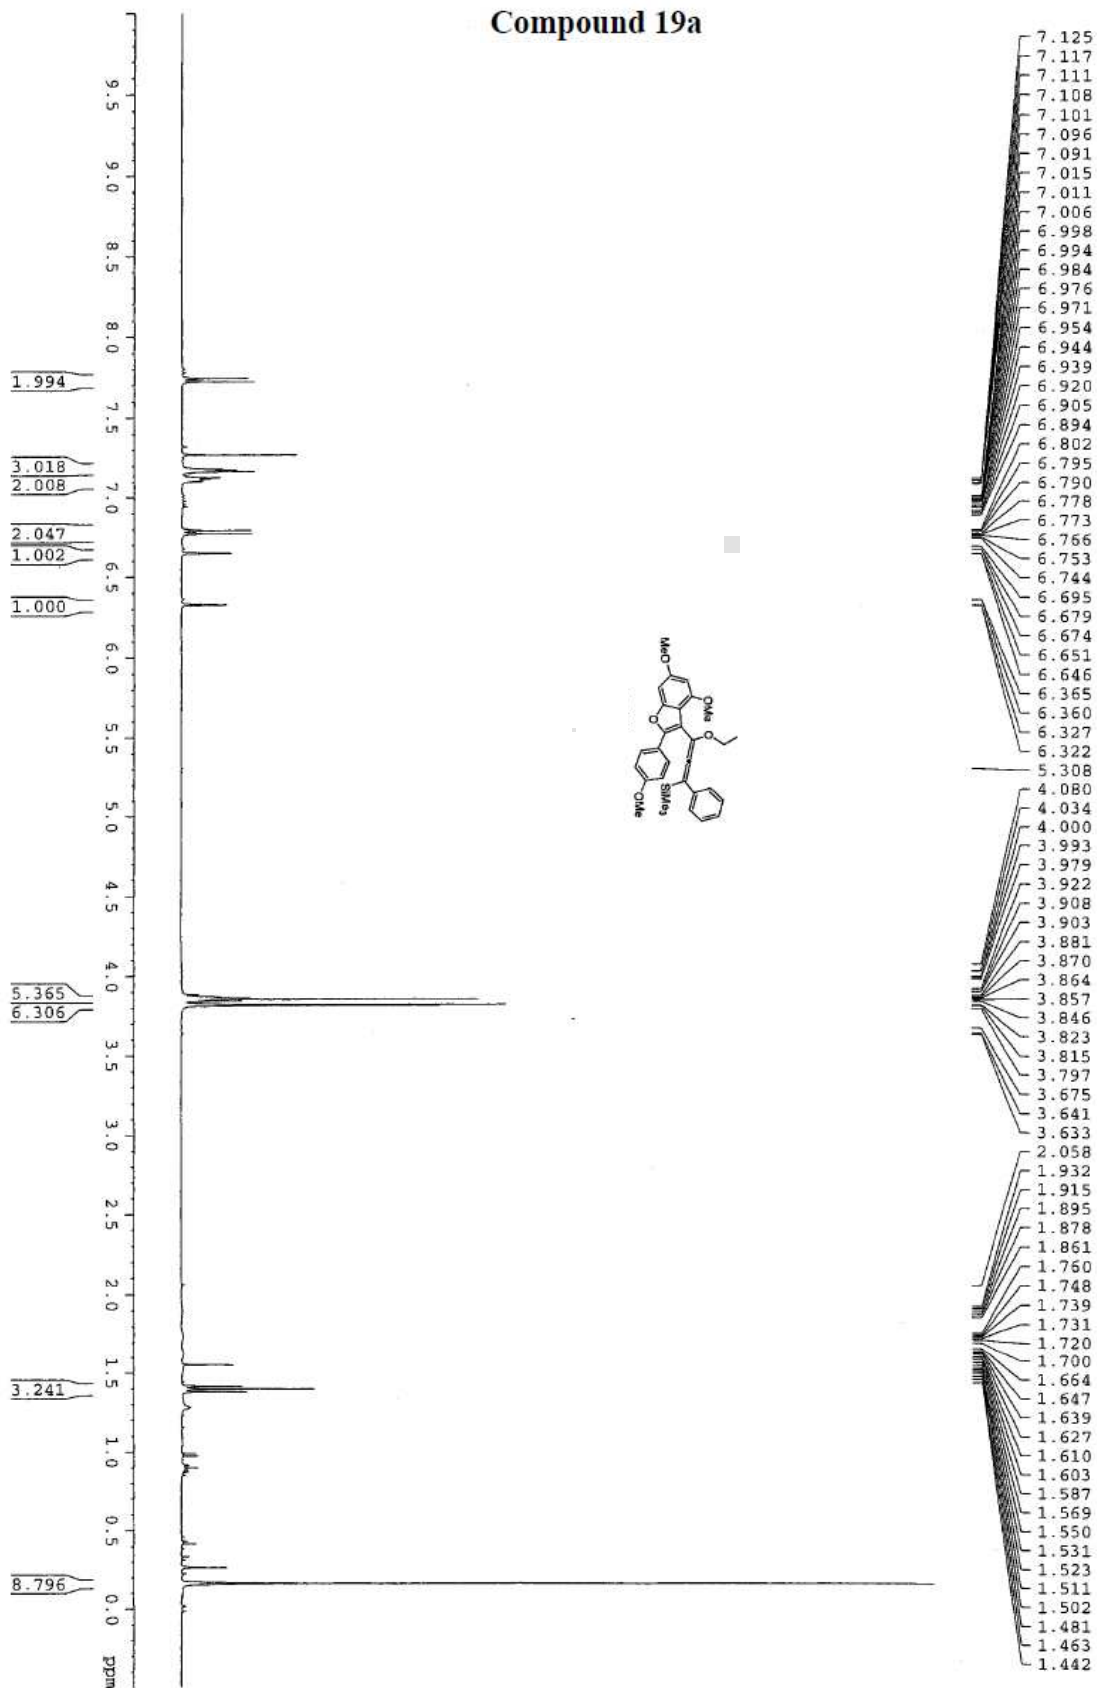



# Compound 19a

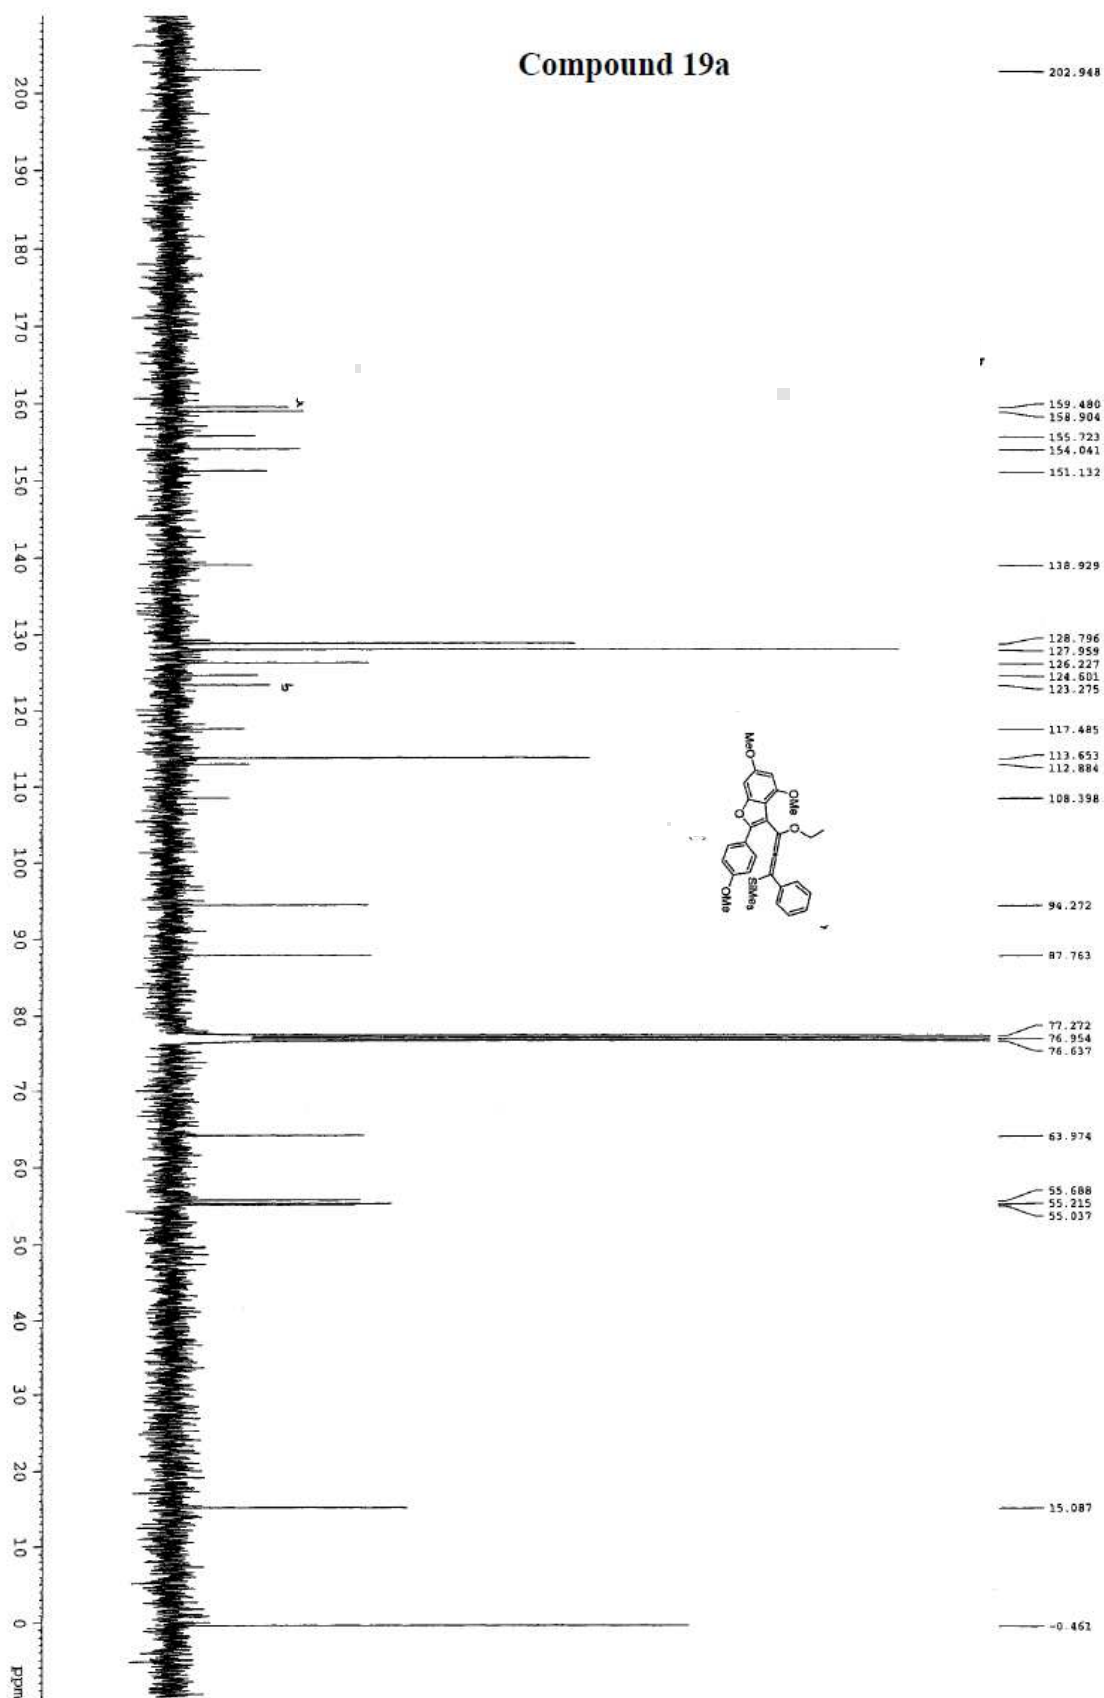

# Compound 15a

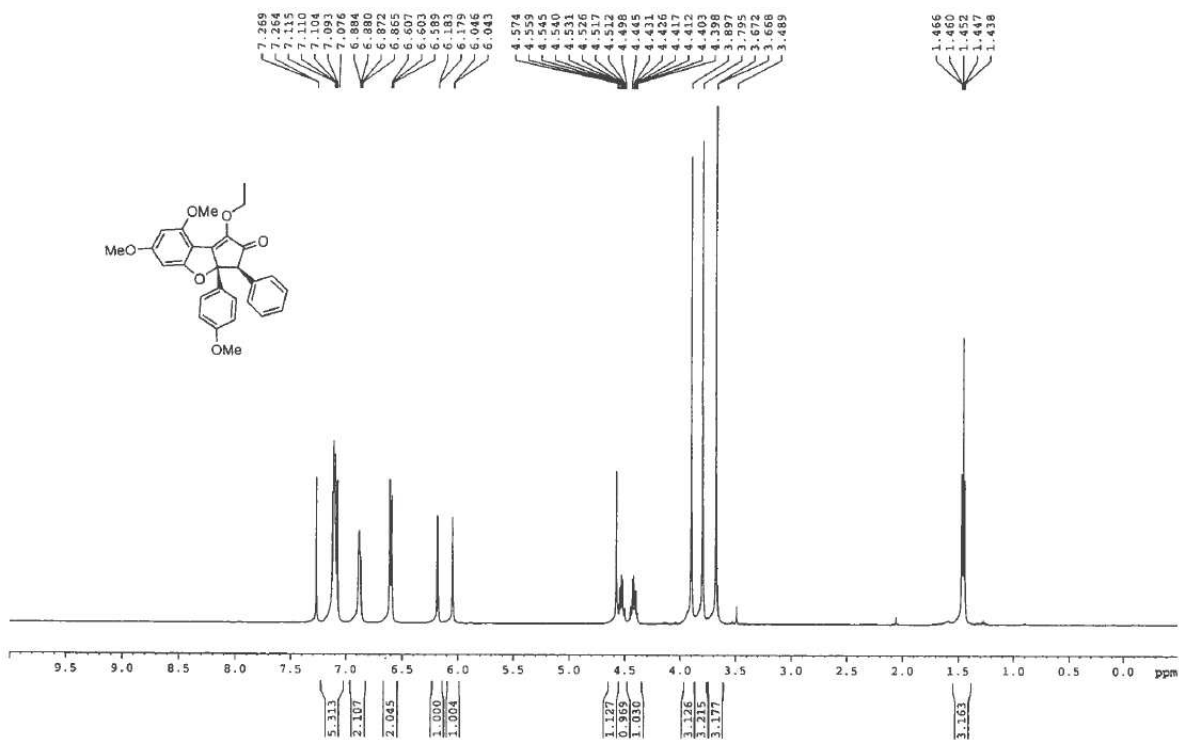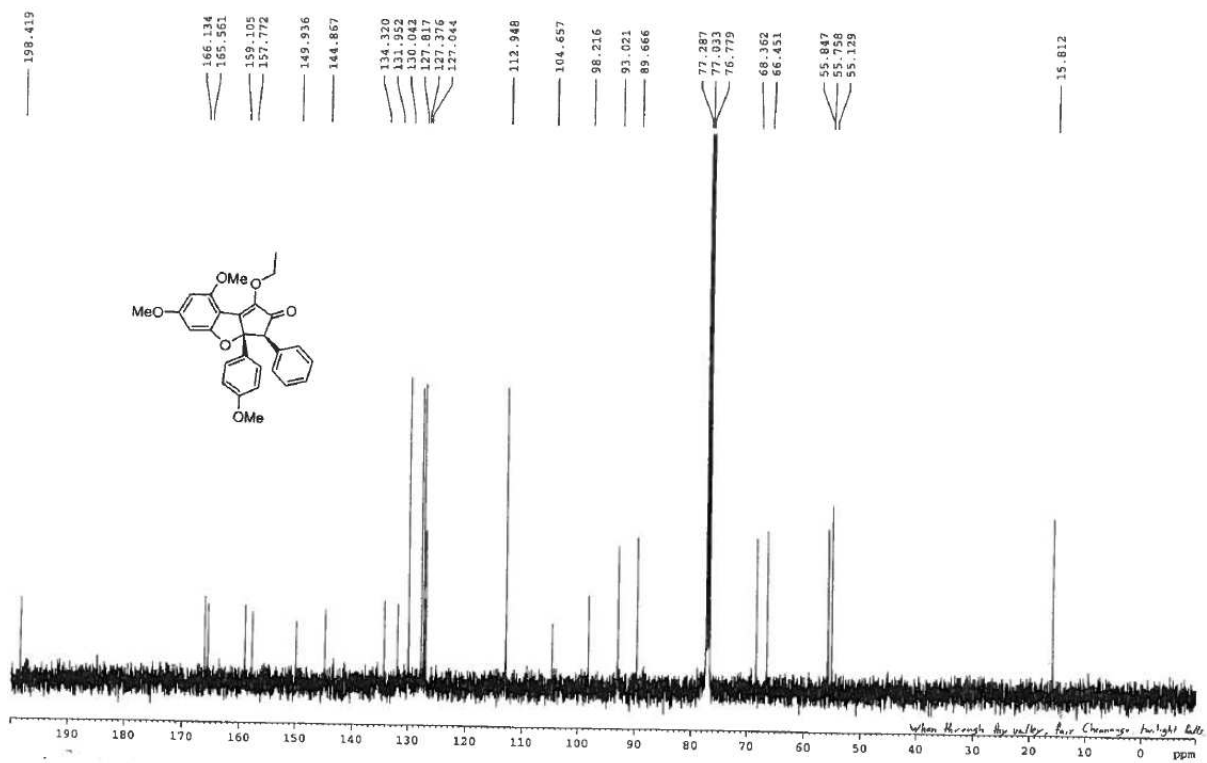

# Compound 15b

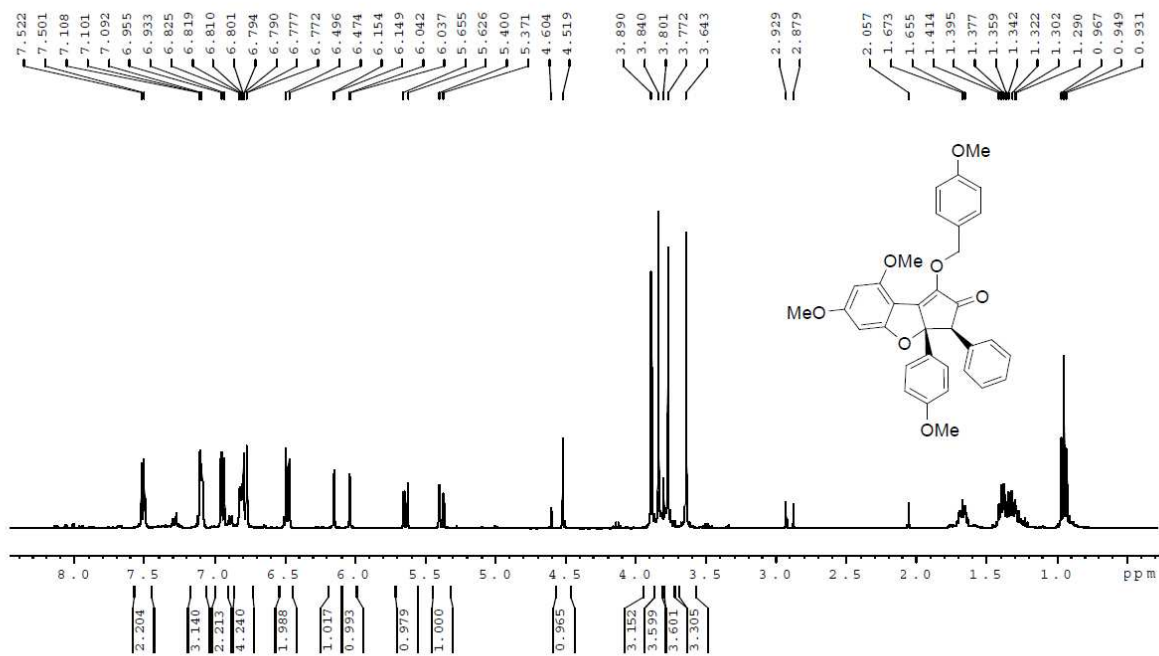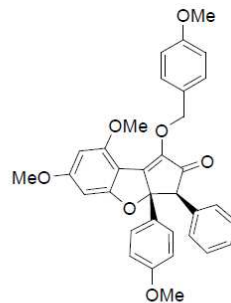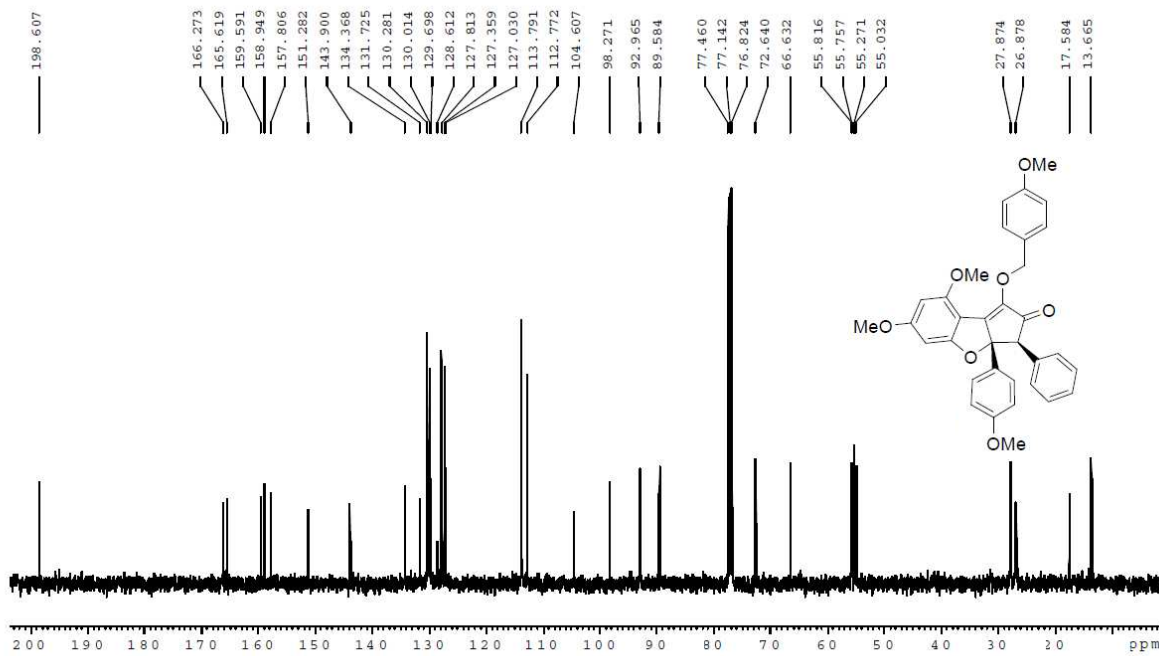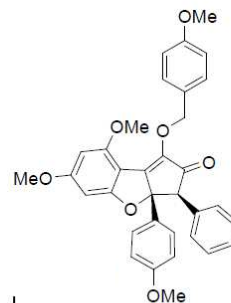

# Compound 20

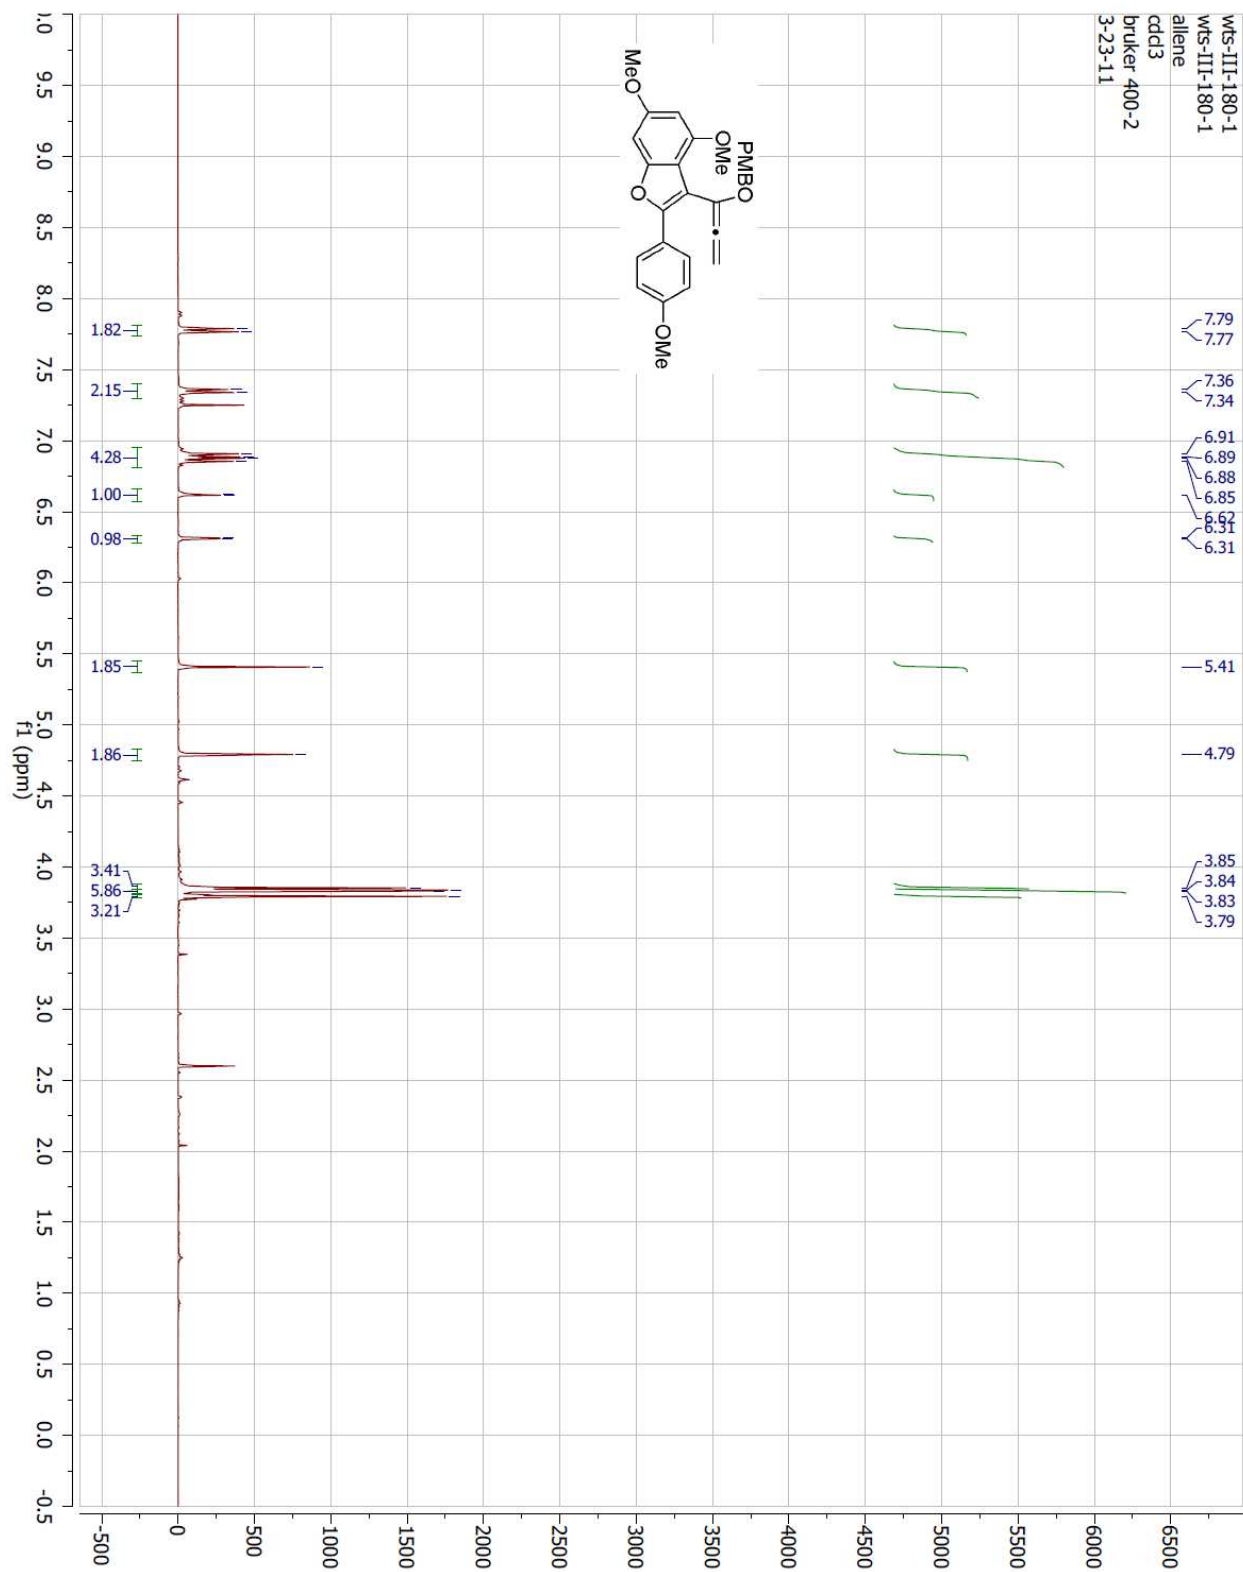

# Compound 20

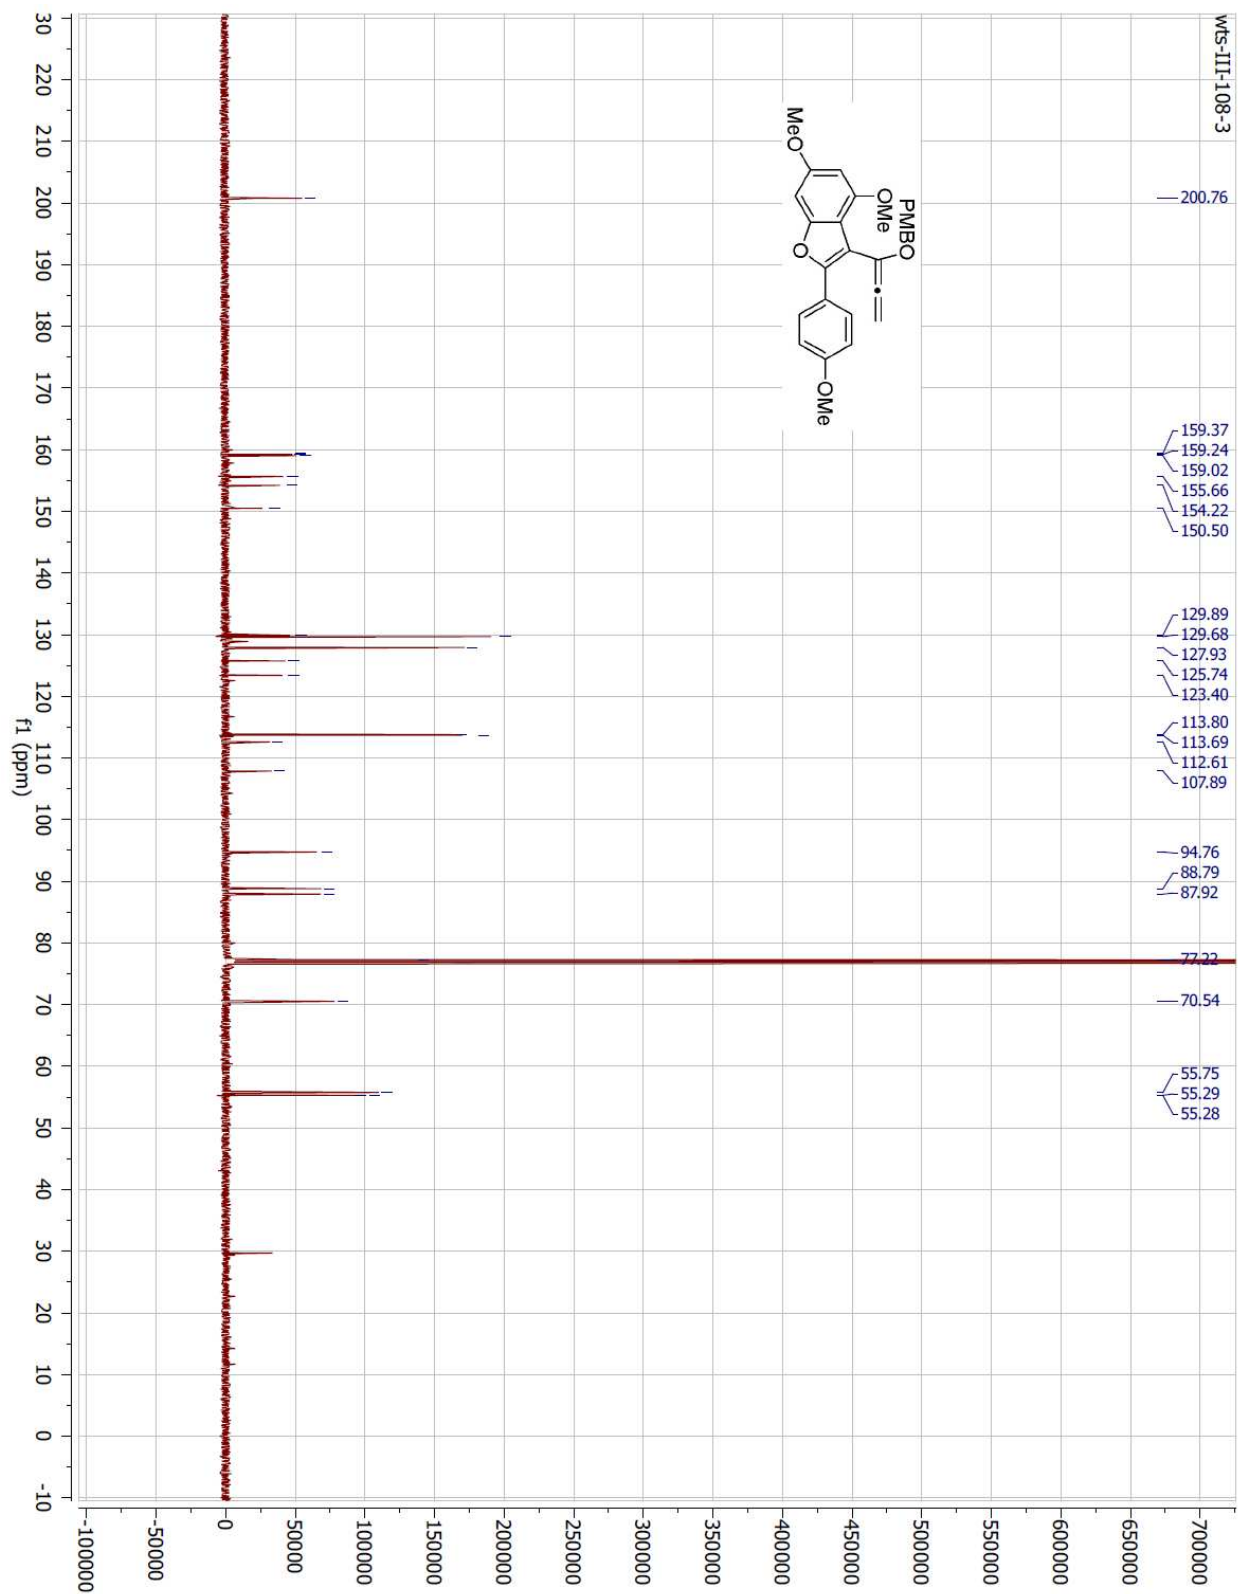

# Compound 22

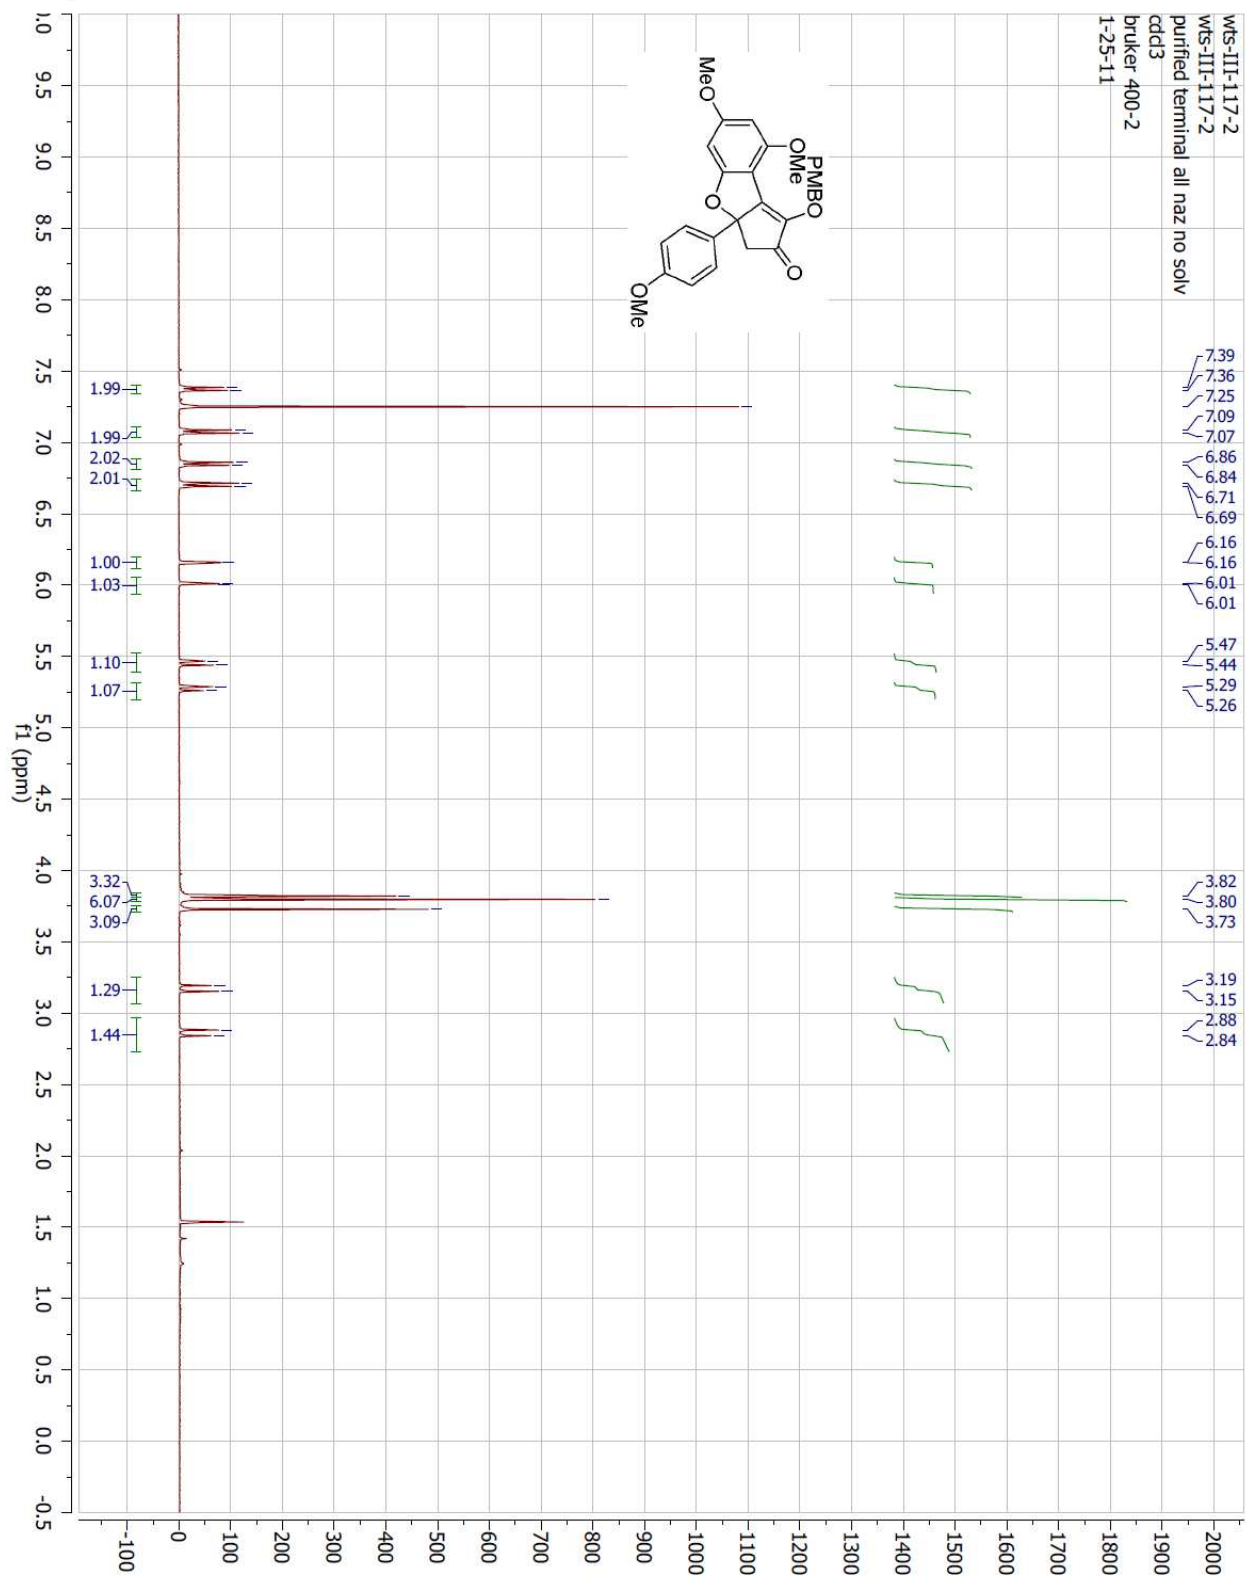

# Compound 22

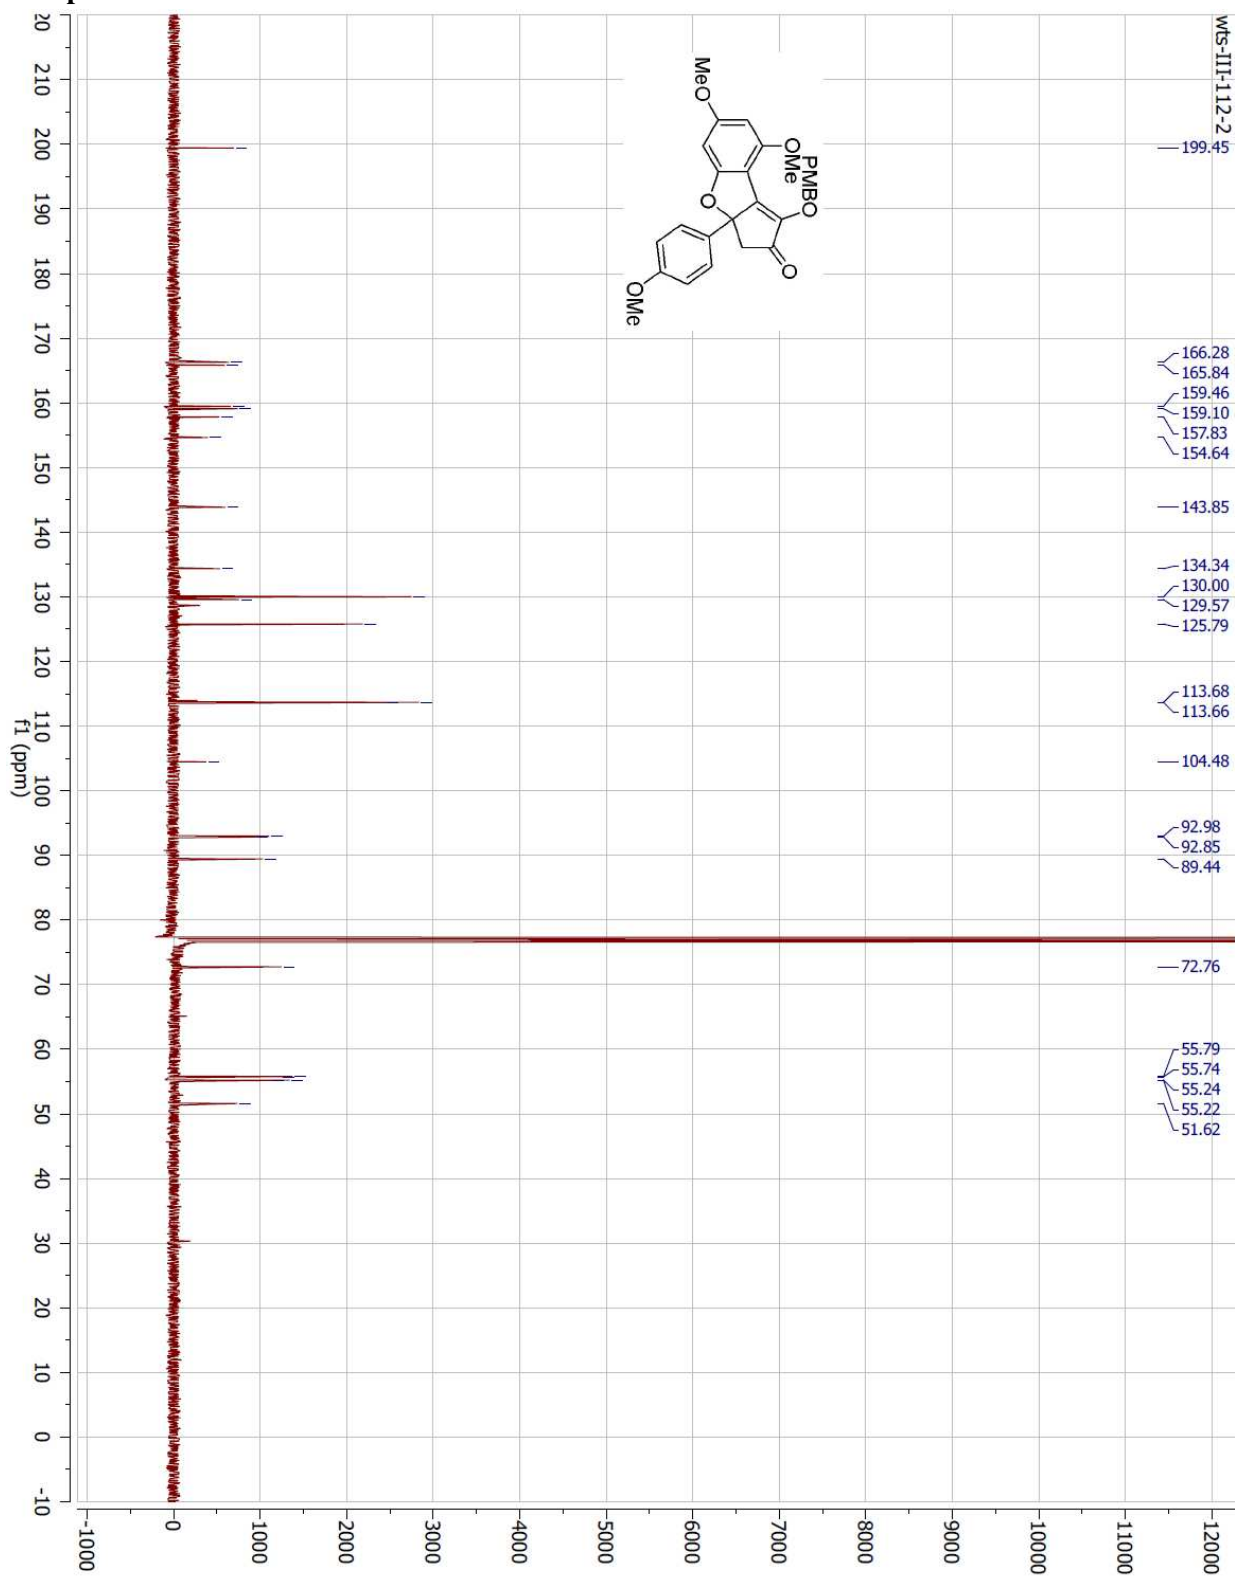

Compound 26

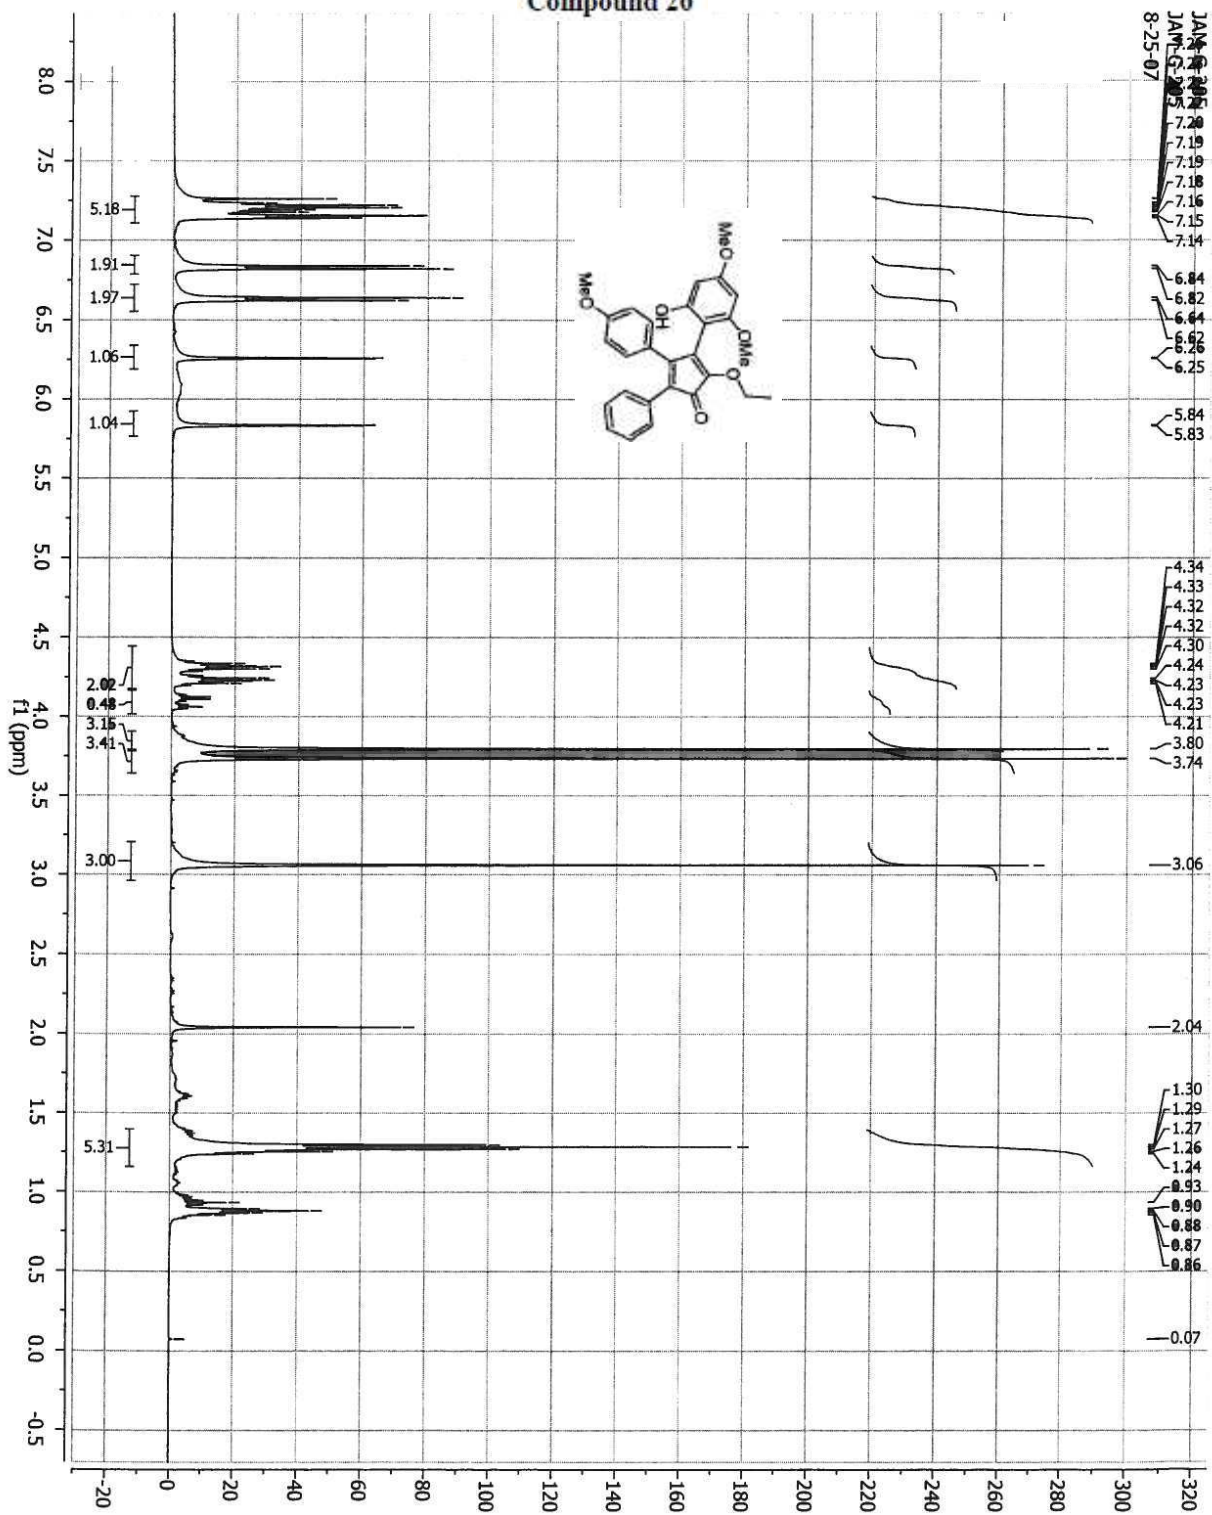



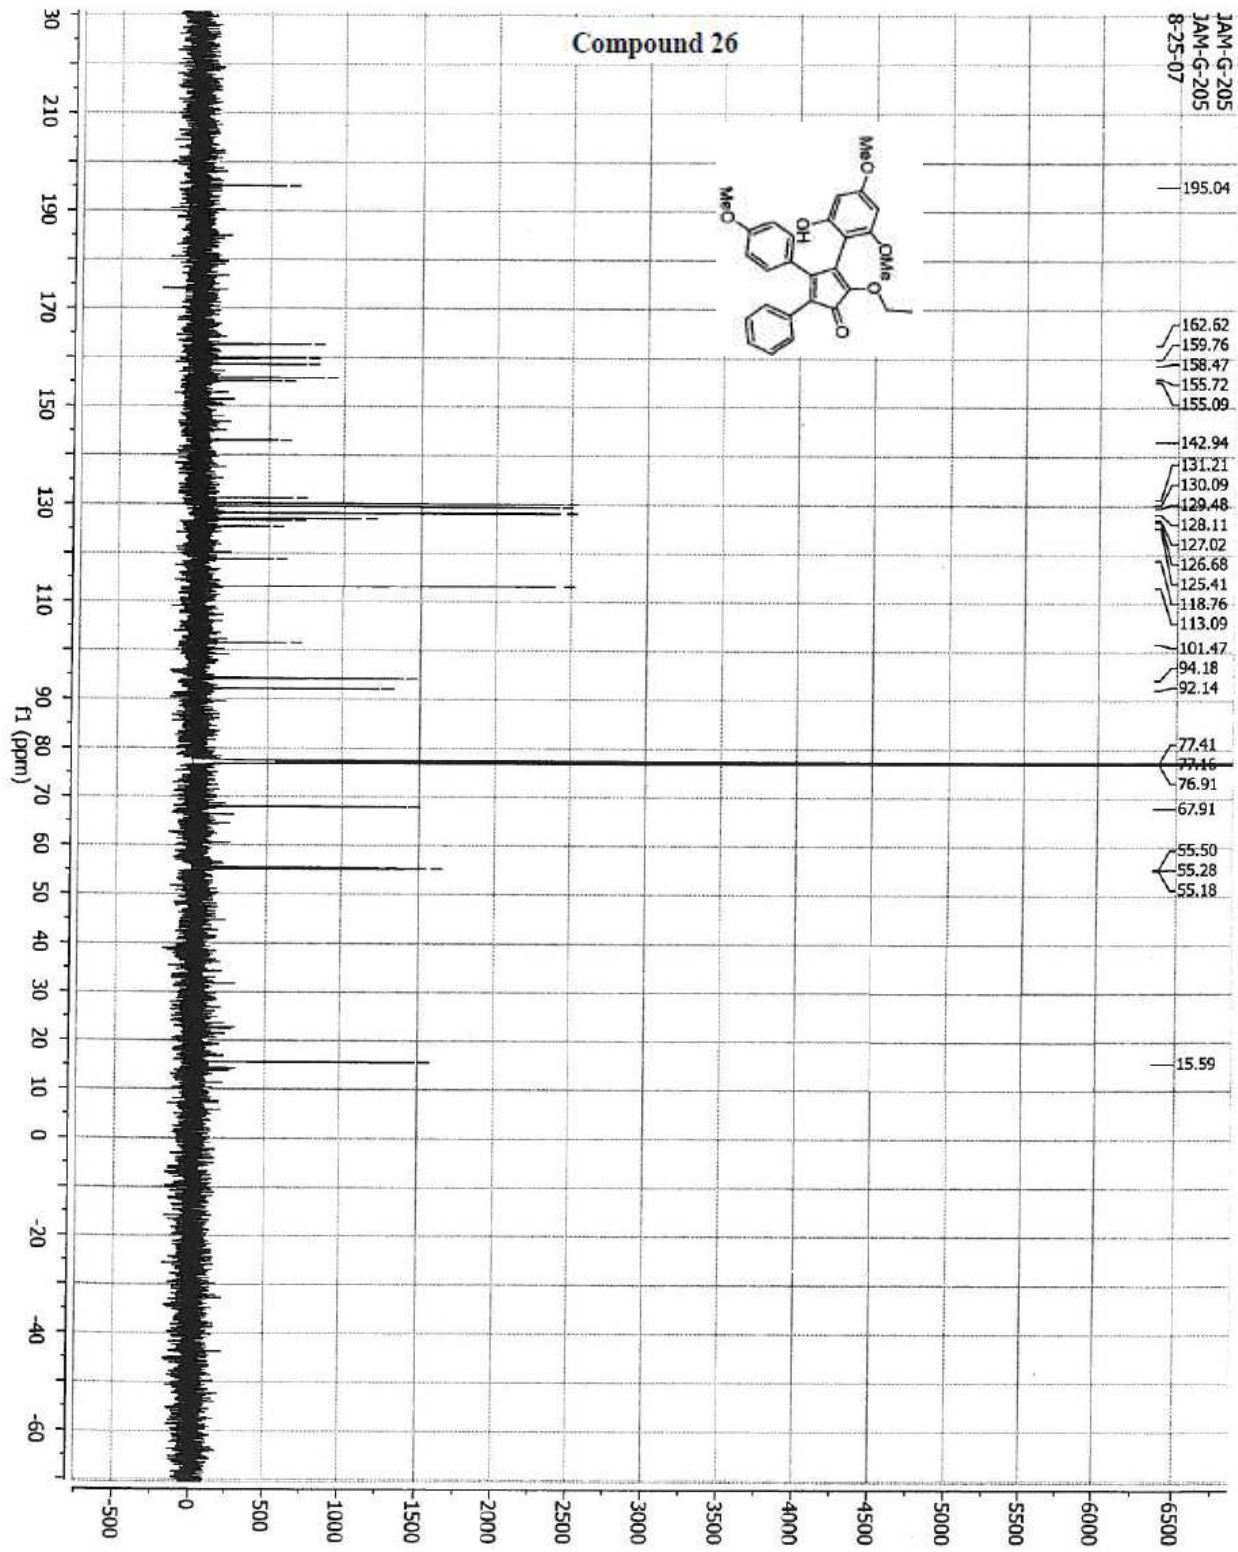

Compound 27

JAM-H-199  
03-31-08

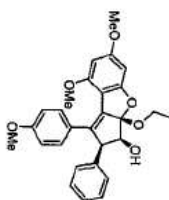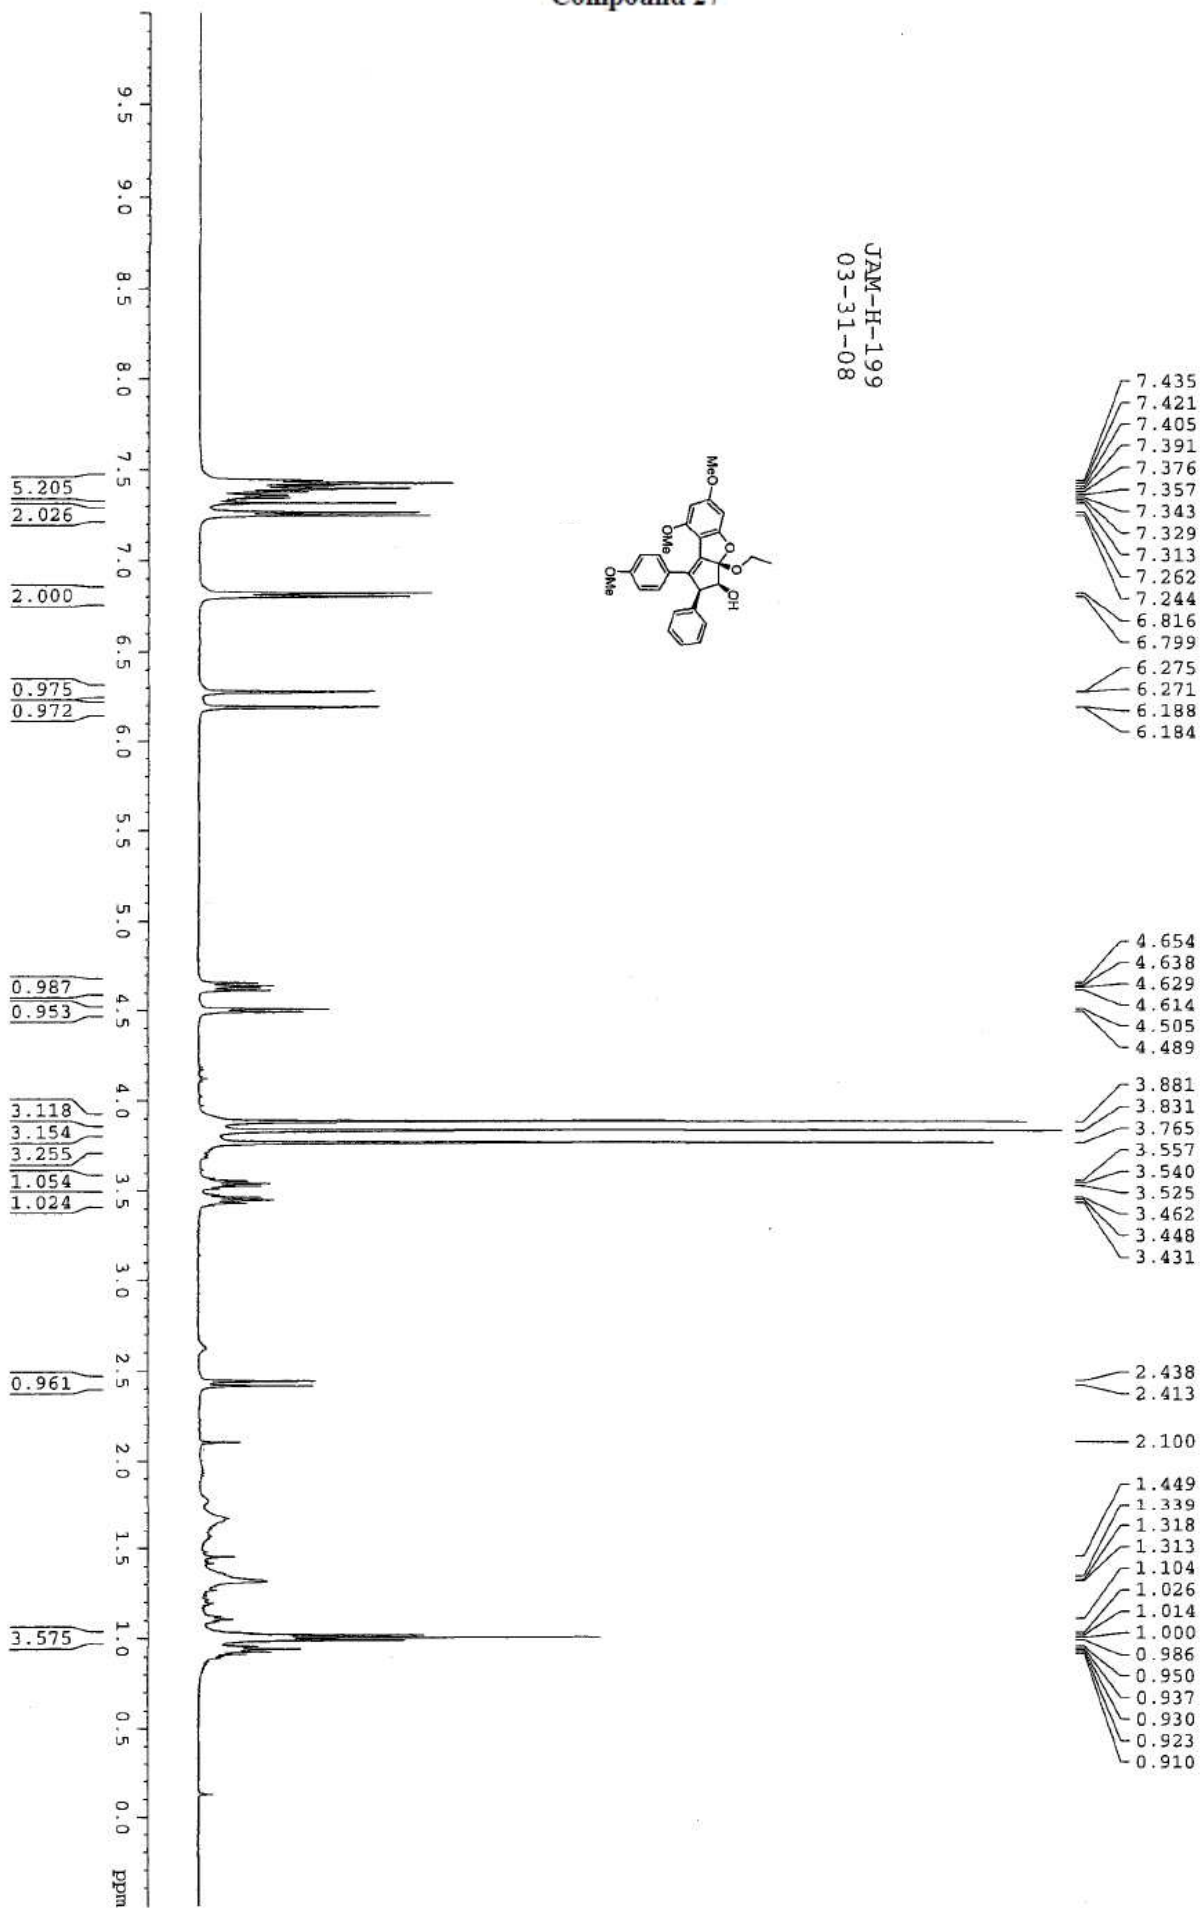

# Compound 27

JAM-H-197  
03-31-08  
major spot (above sm)

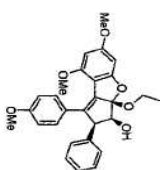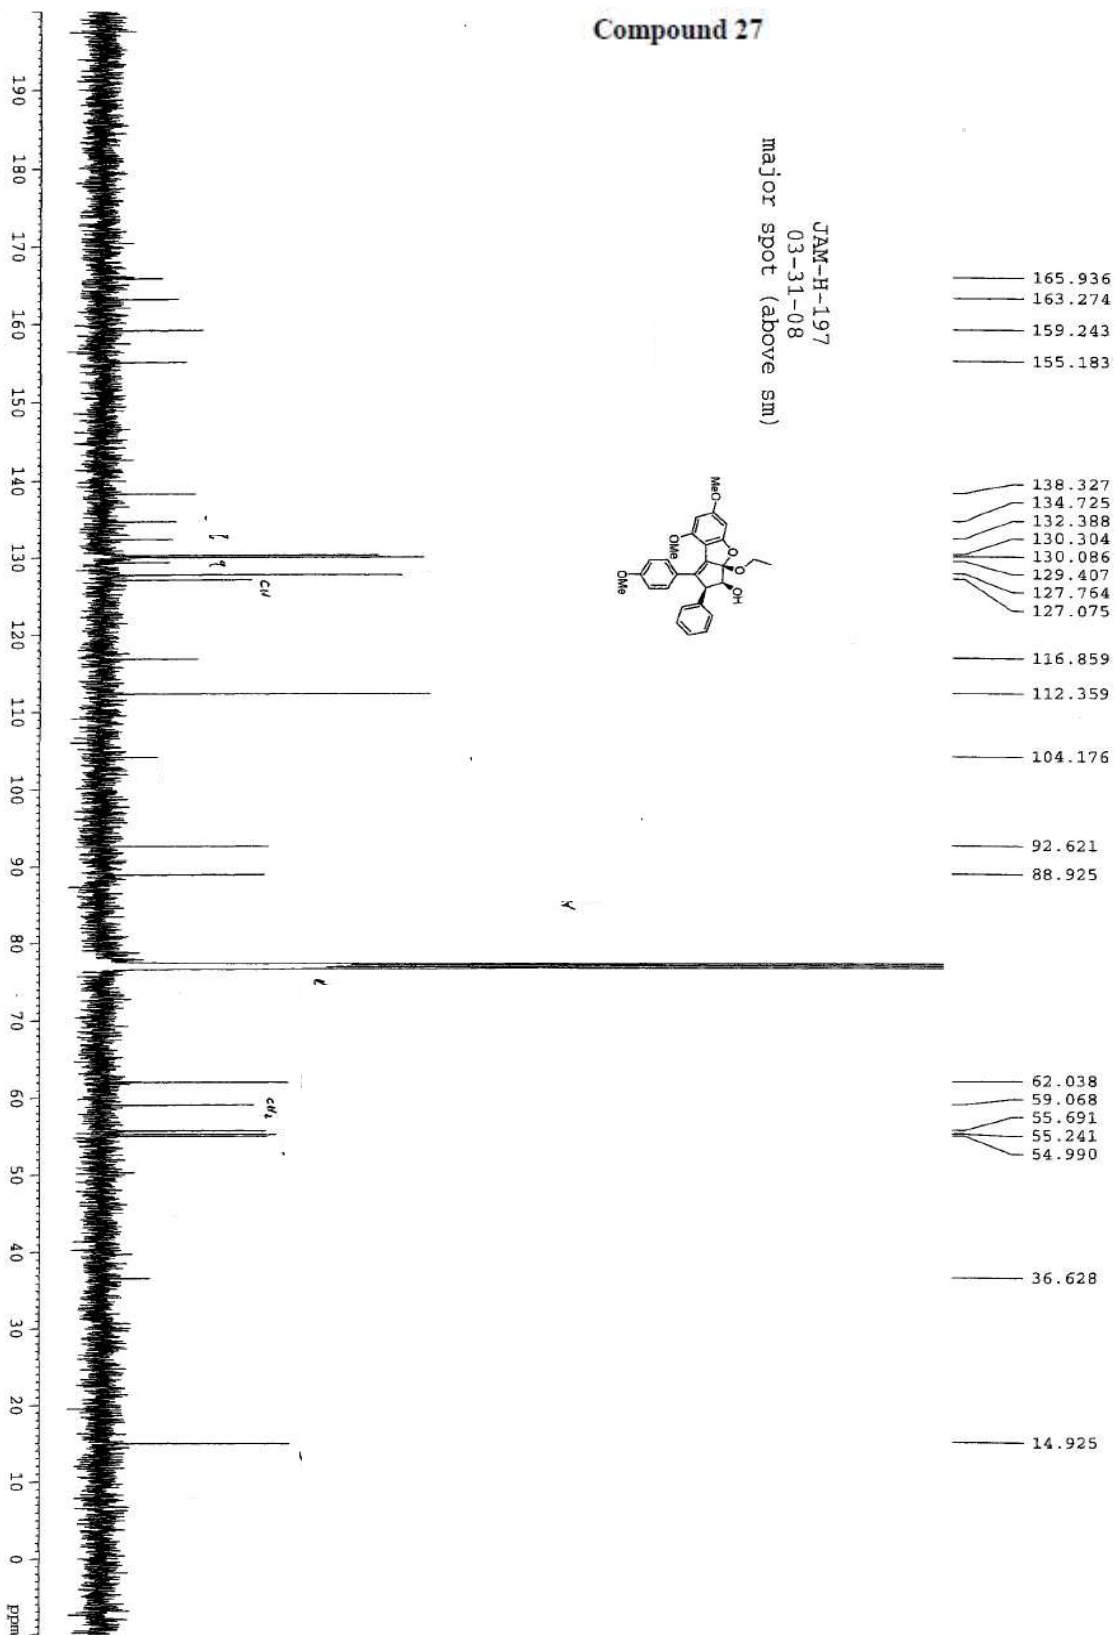

Compound 28a

JAM-I-008  
04/23/04

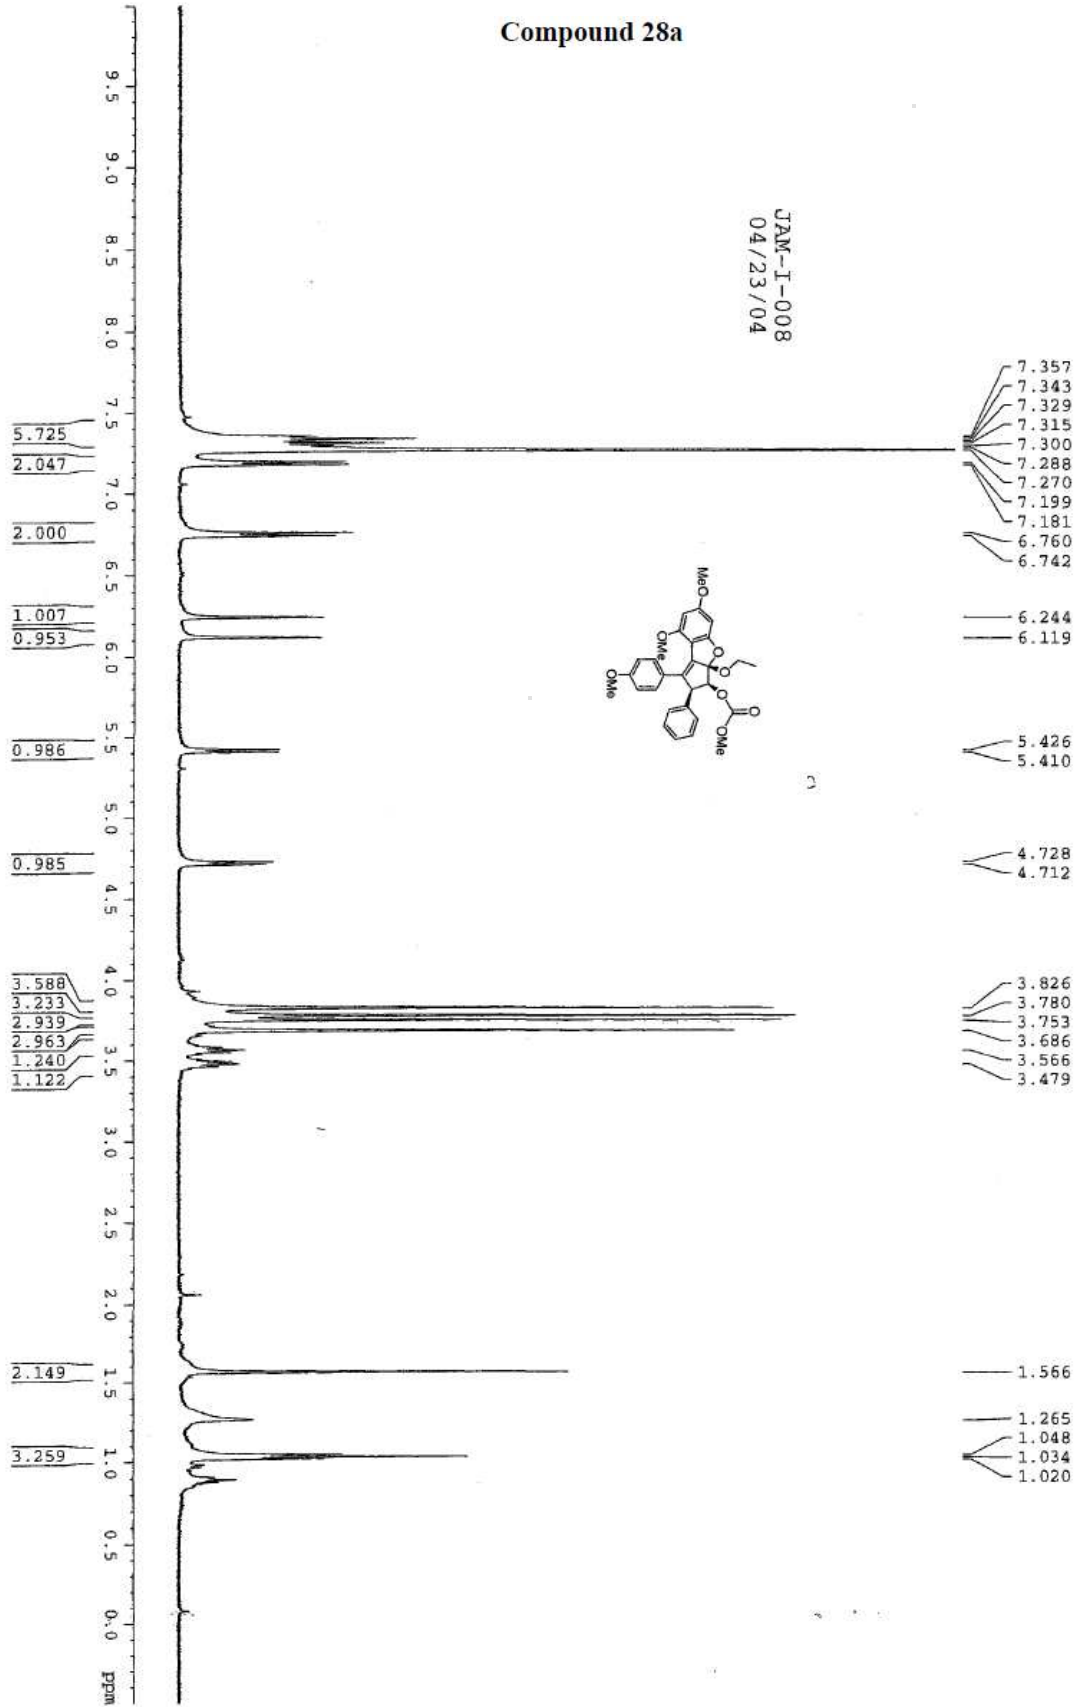

Compound 28b

JAM-I-049  
05-16-08

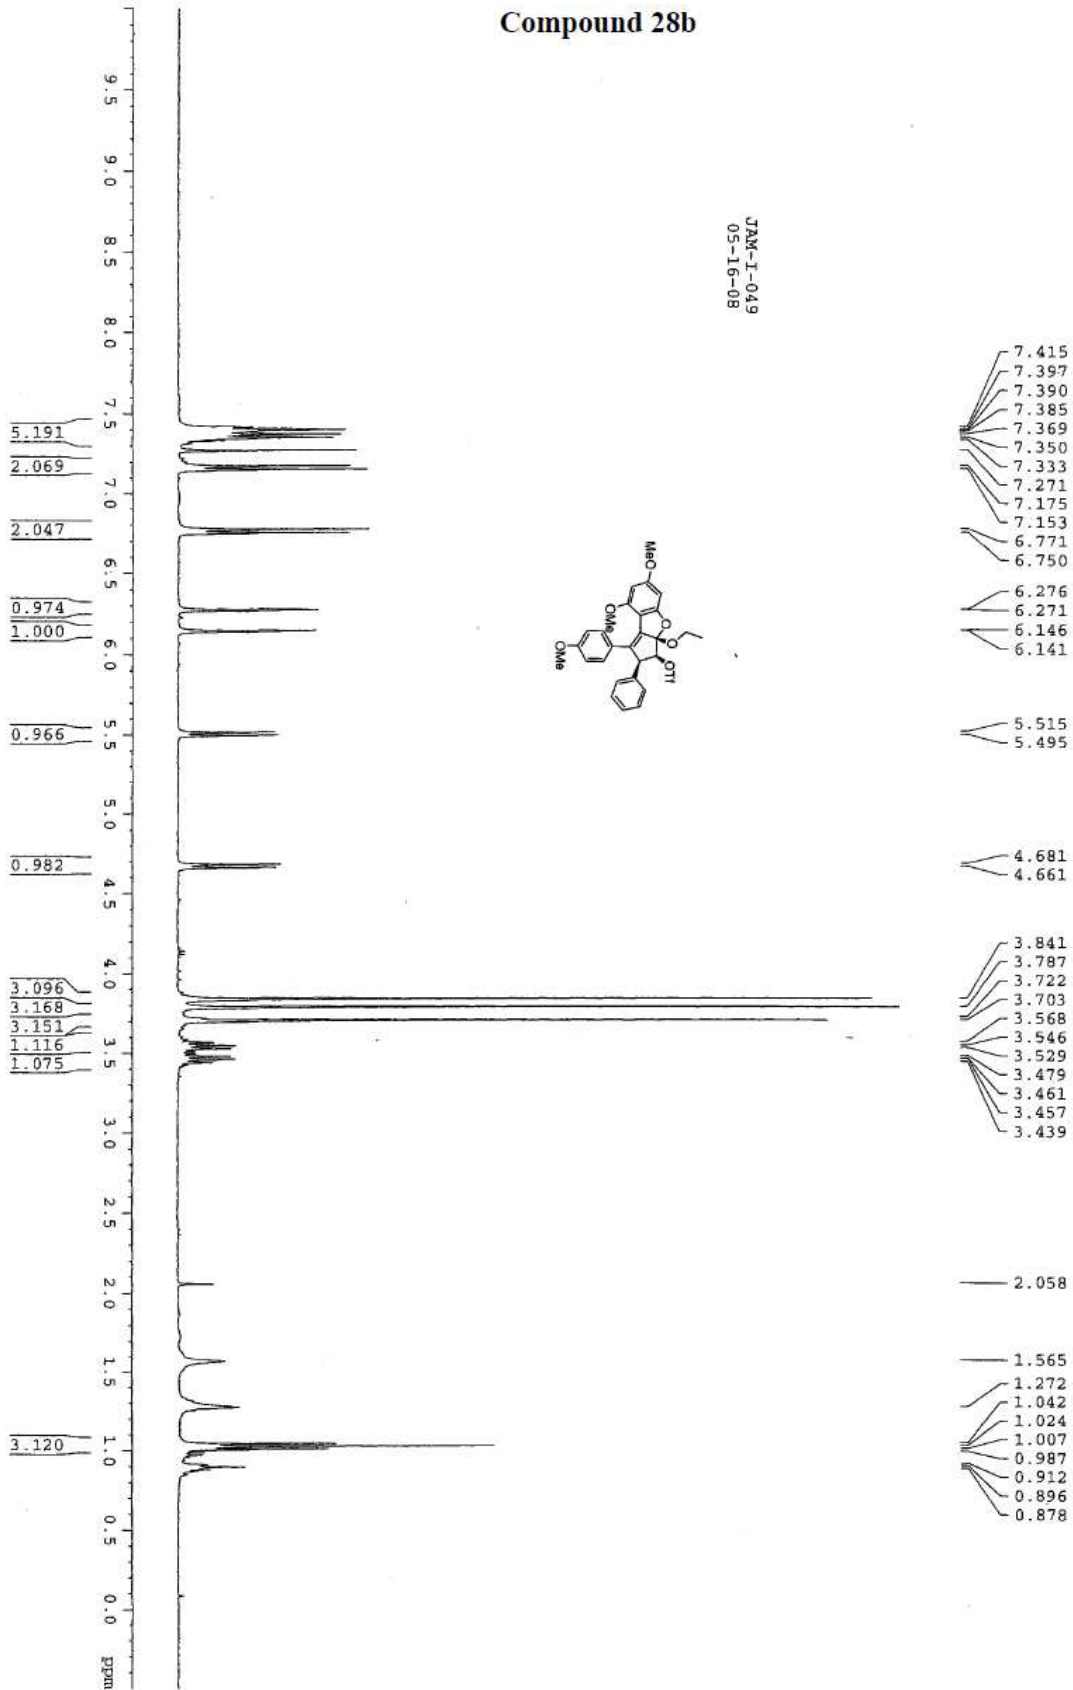

# Compound 28b

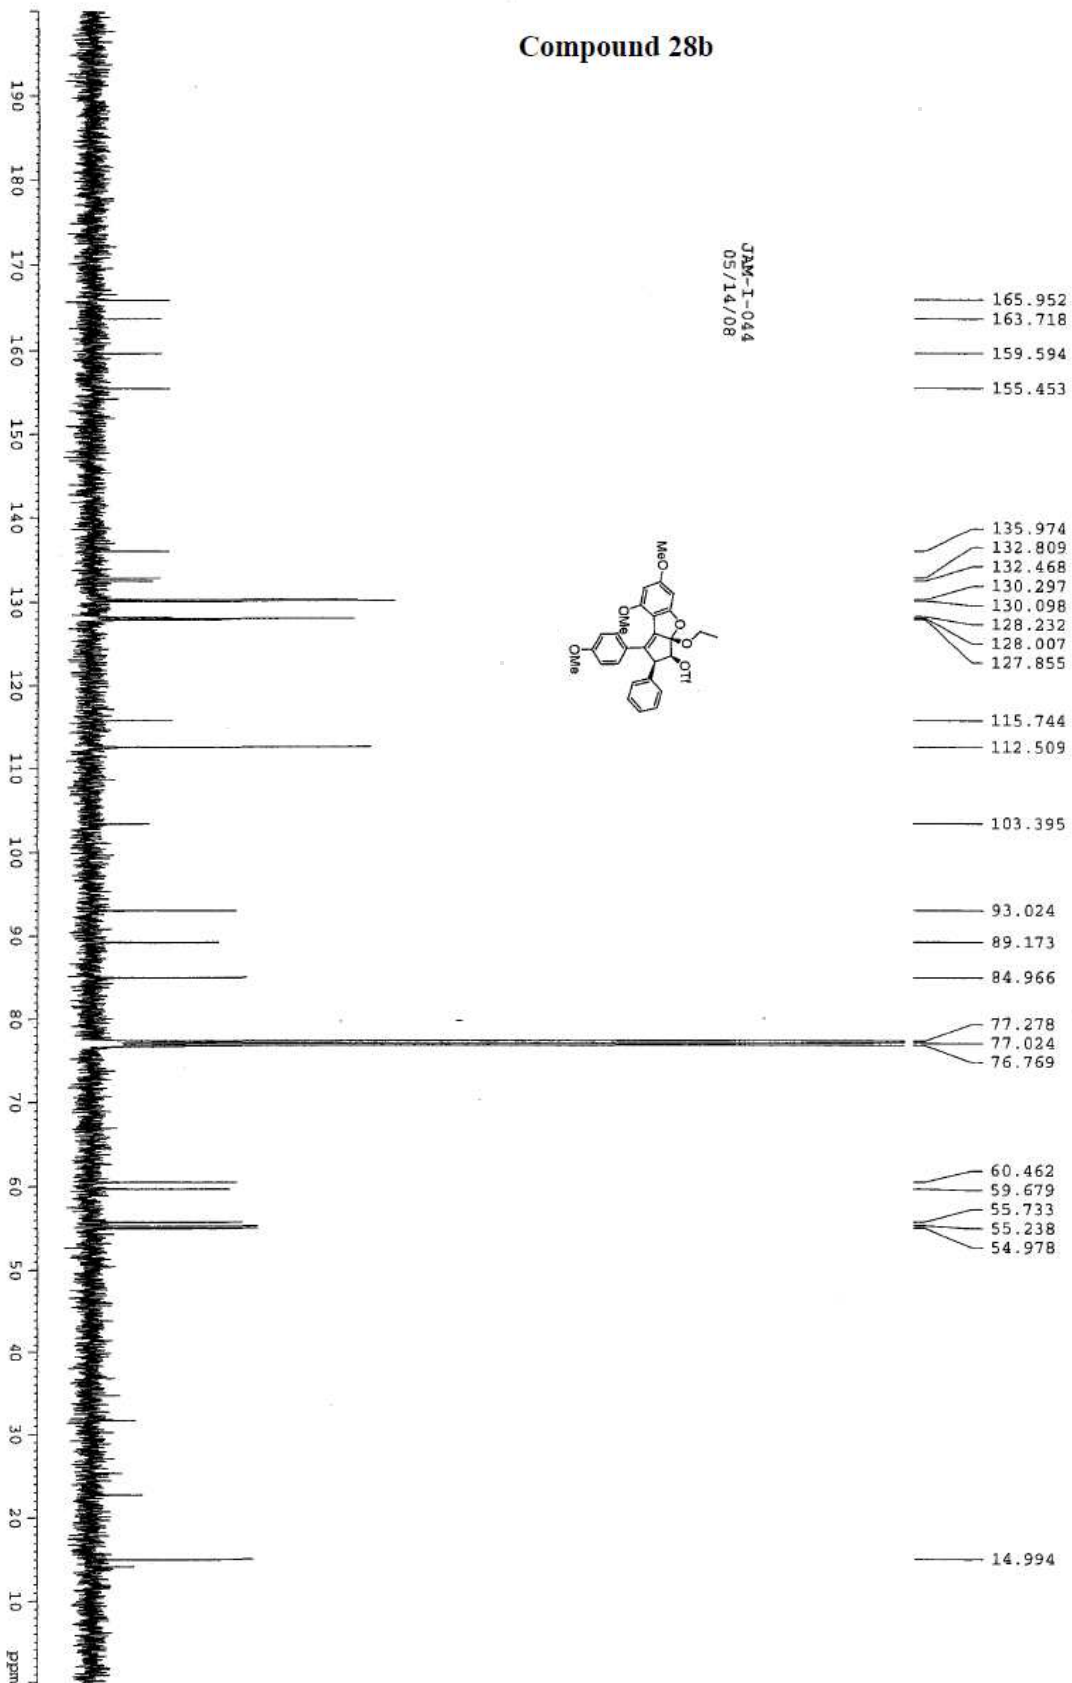

Compound 29

JAM-H-200  
on decomposition p  
mid RP

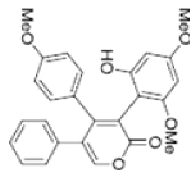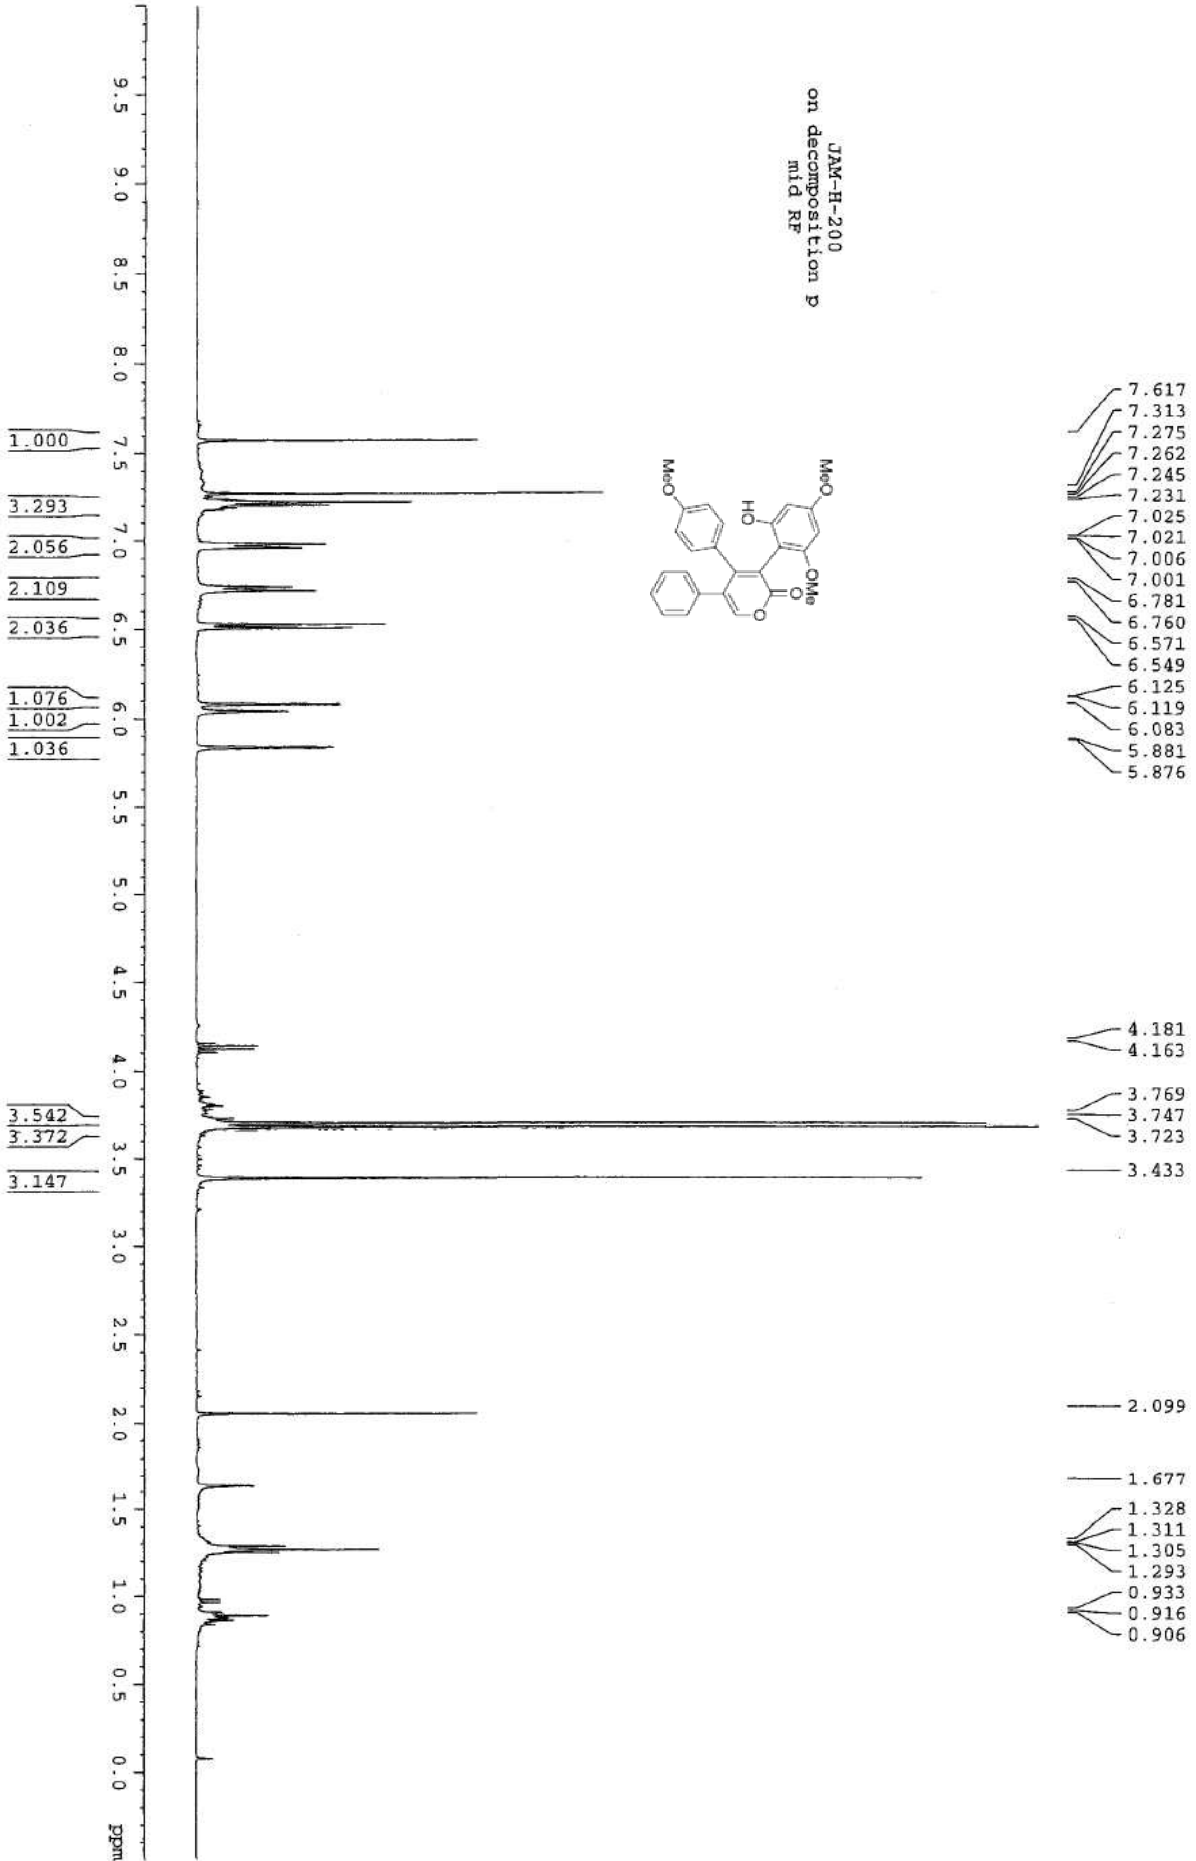

**Compound 37**

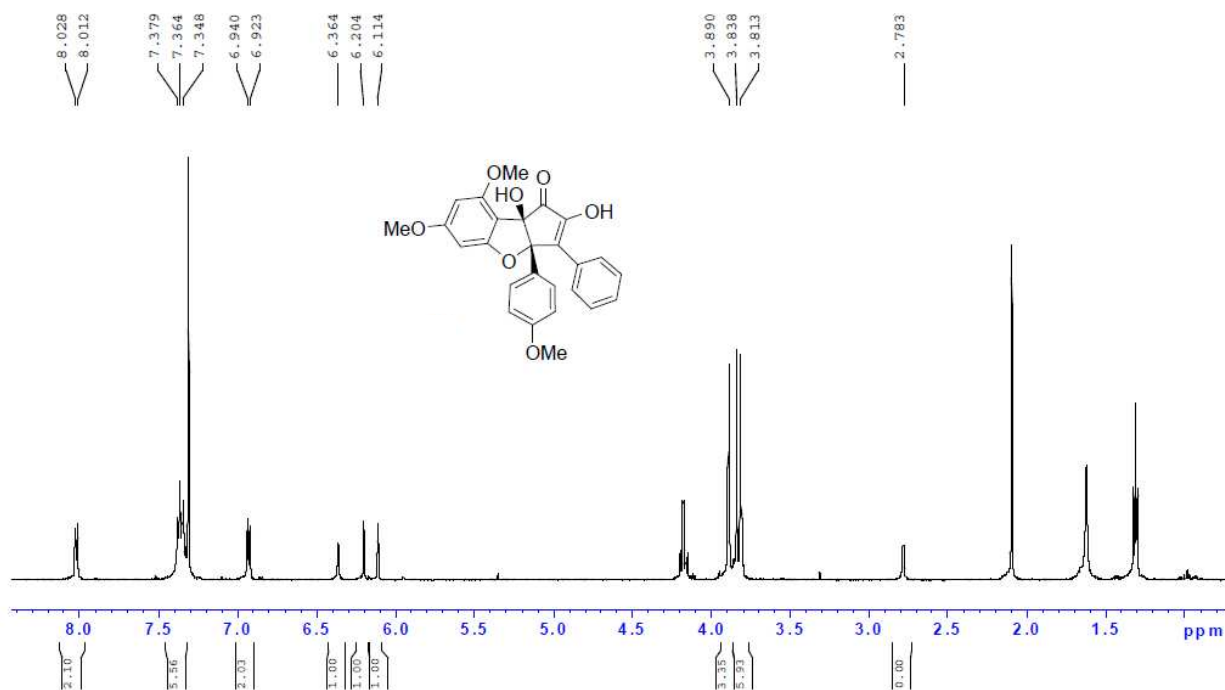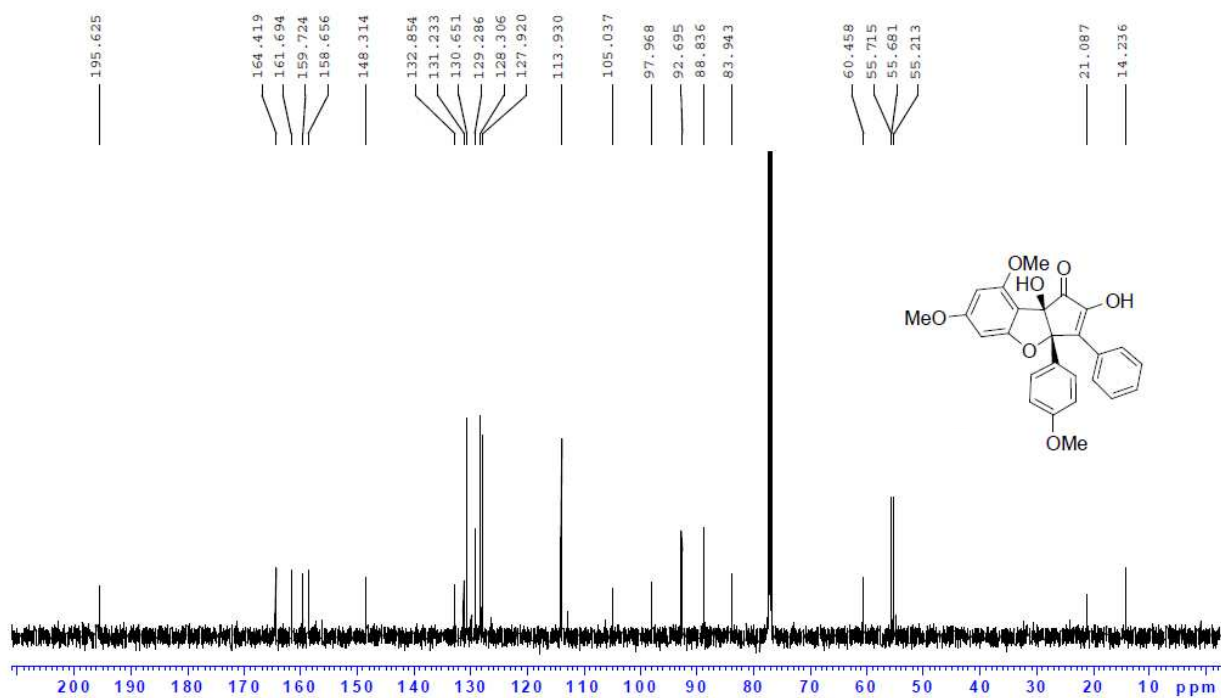



# Compound 38

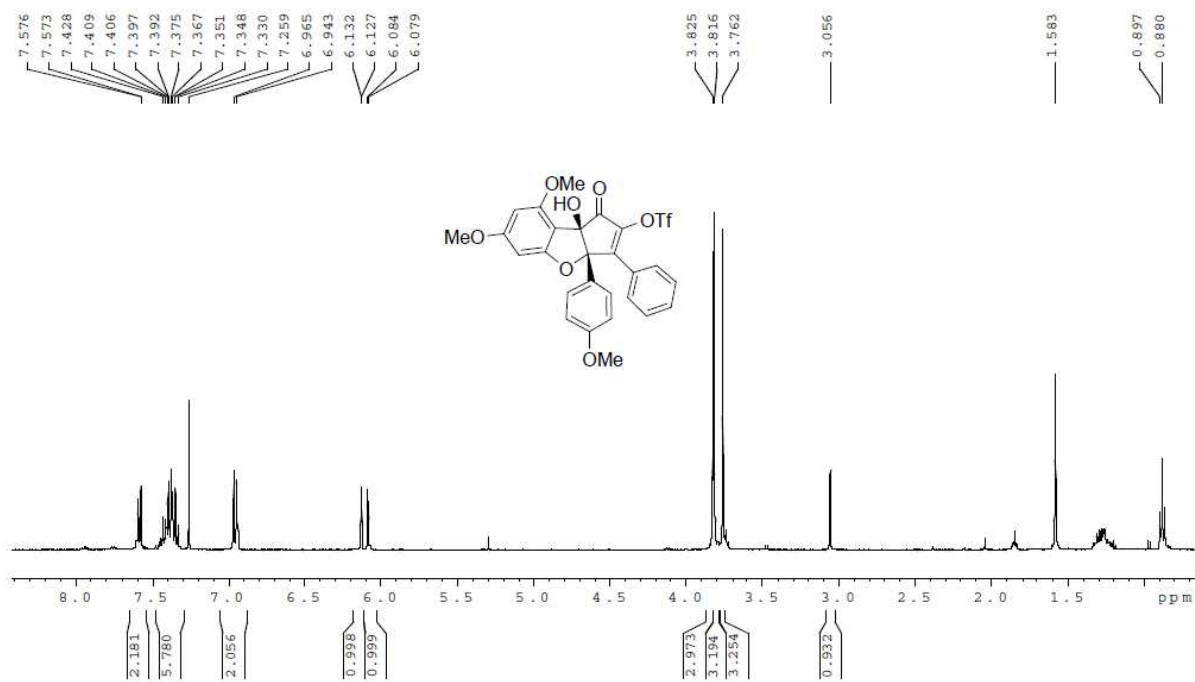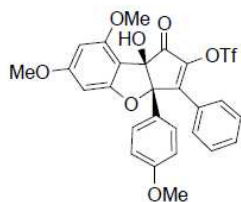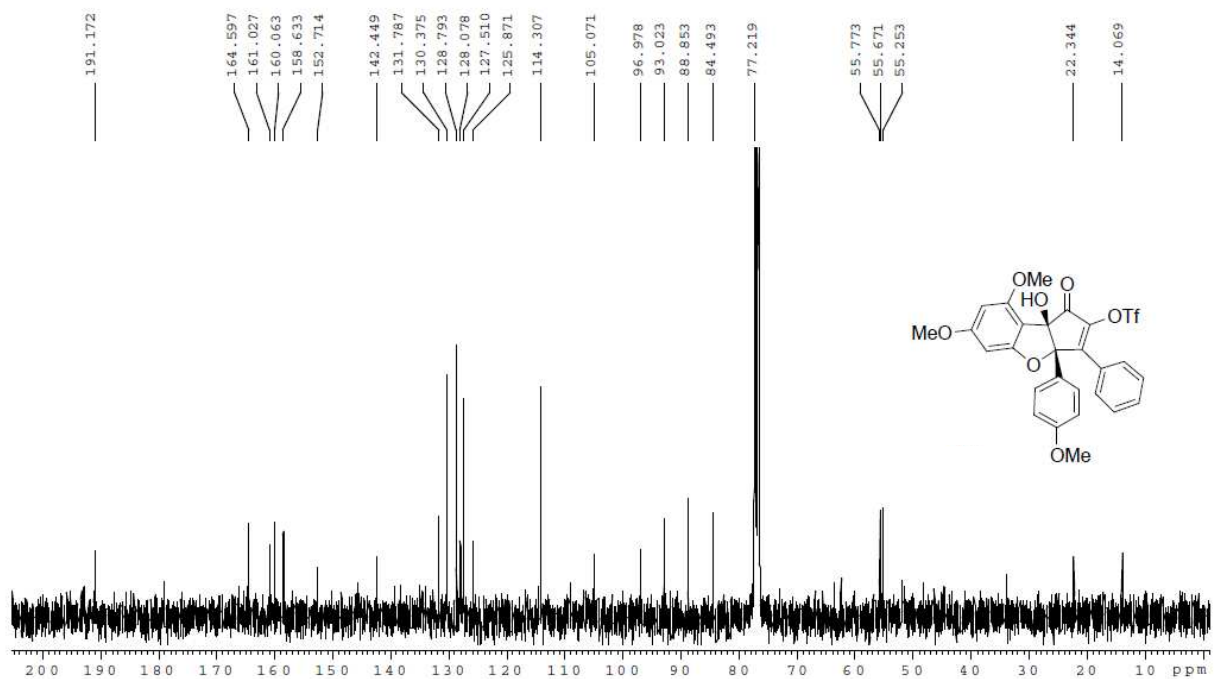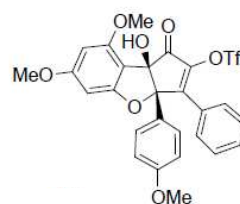

# Compound 39

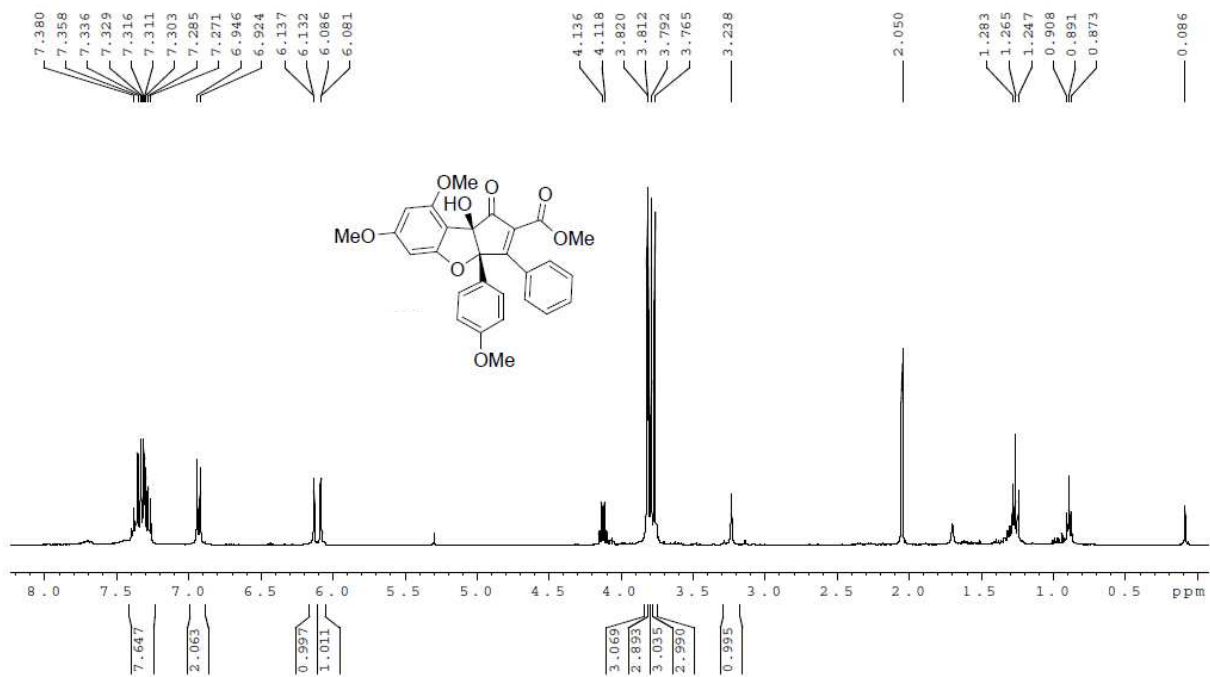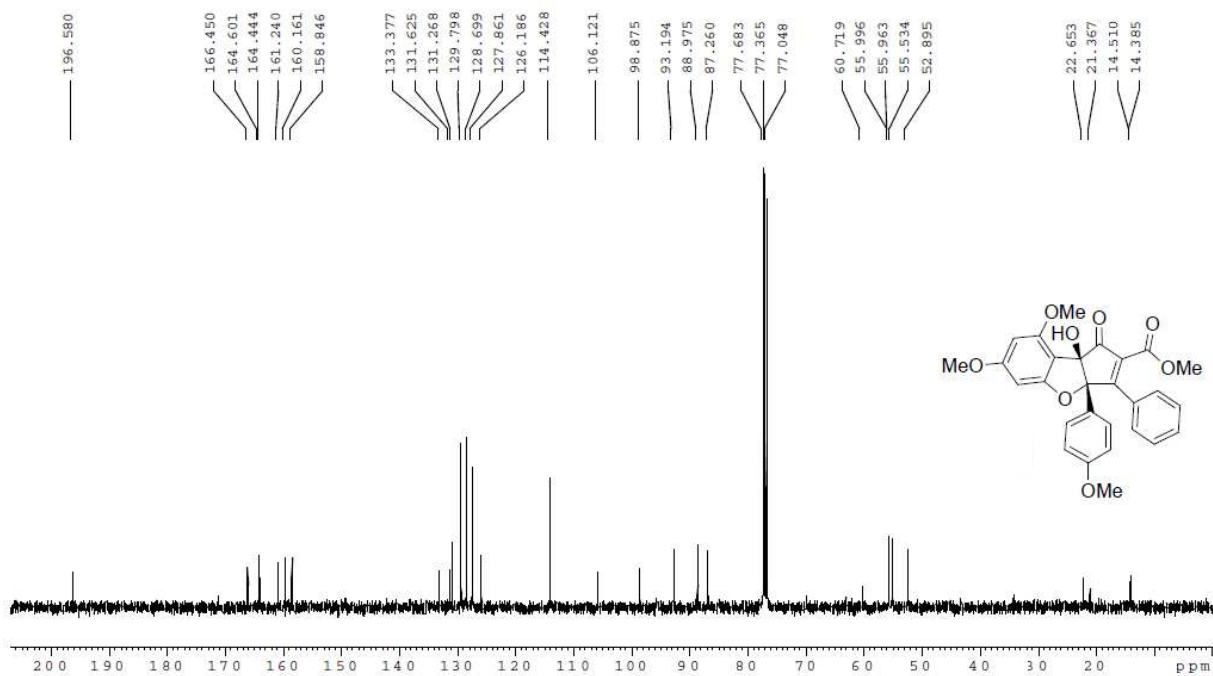

# Compound 41

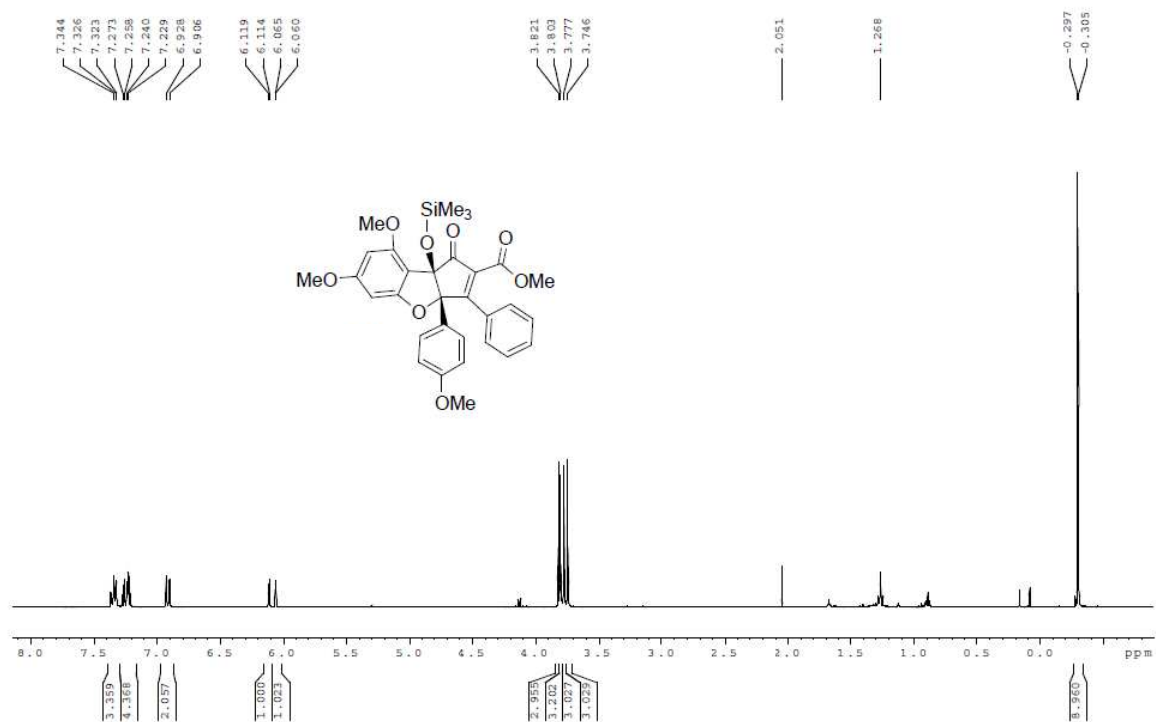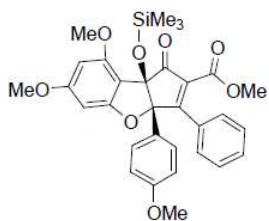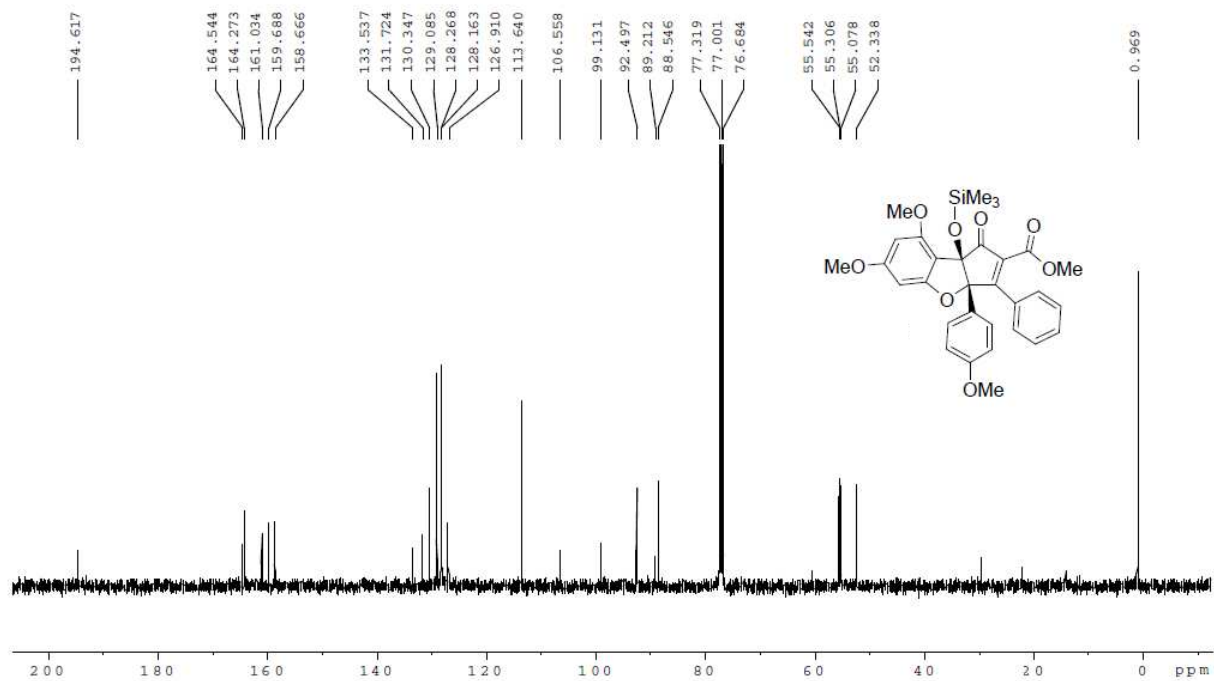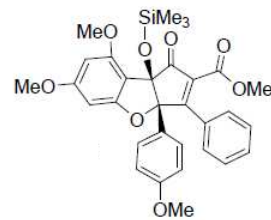

# Compound 42

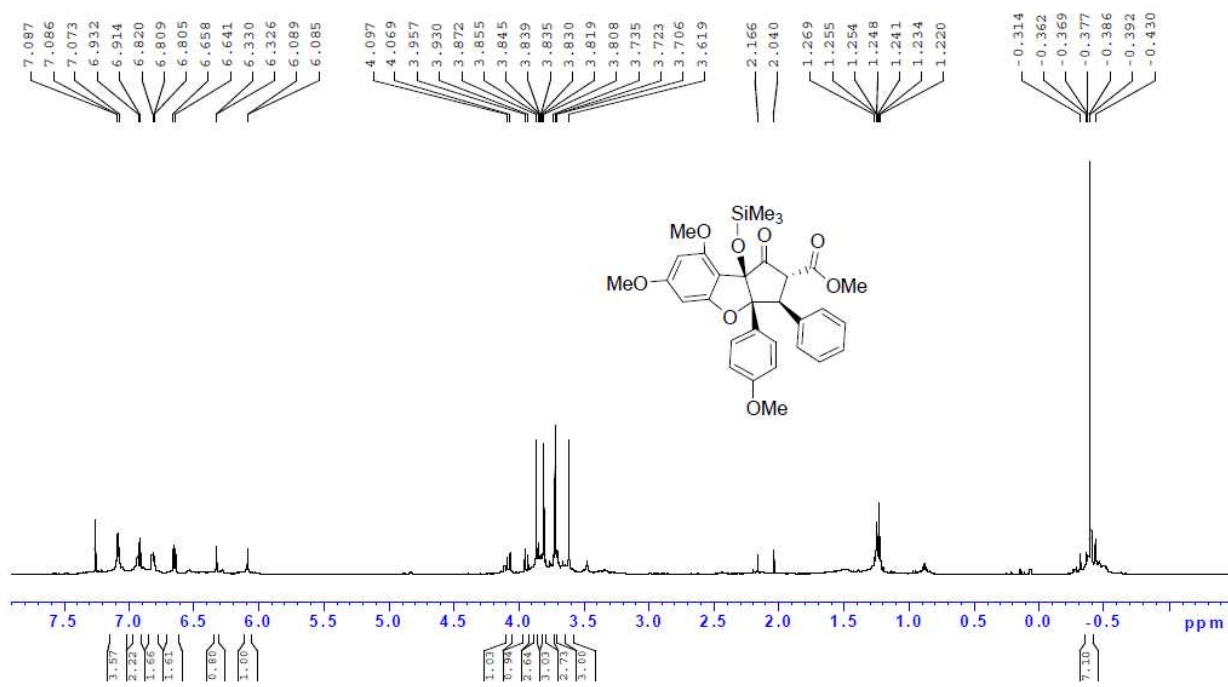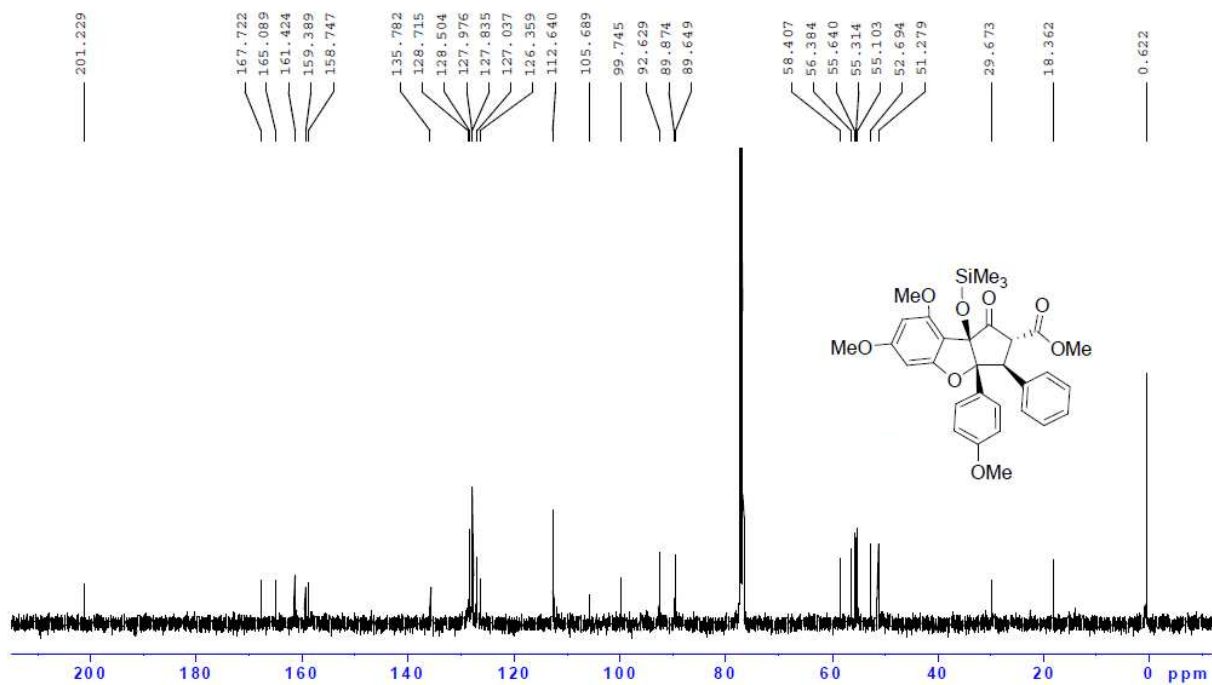

# Compound 40

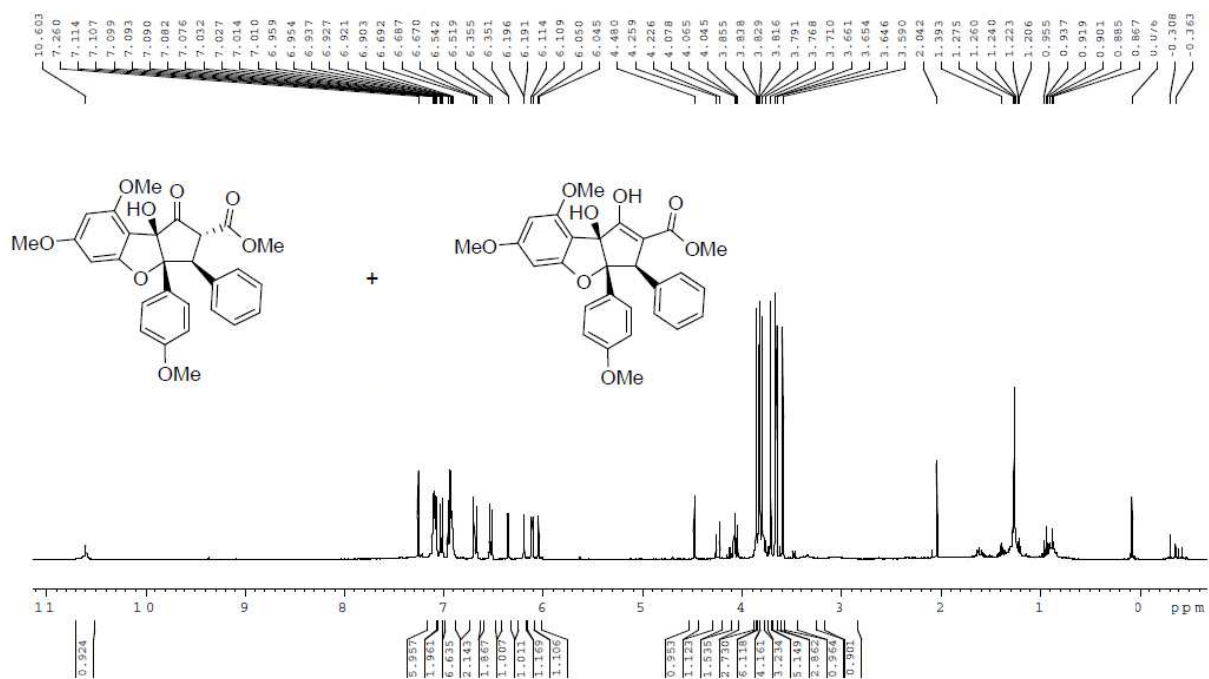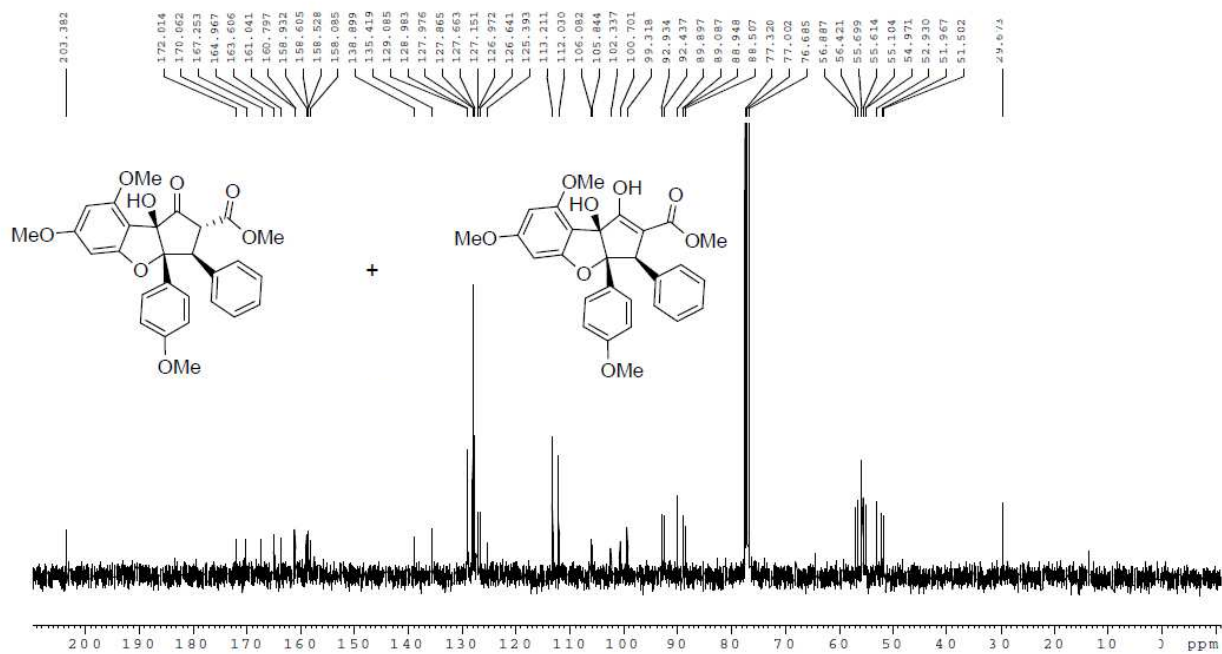

# Compound 1e

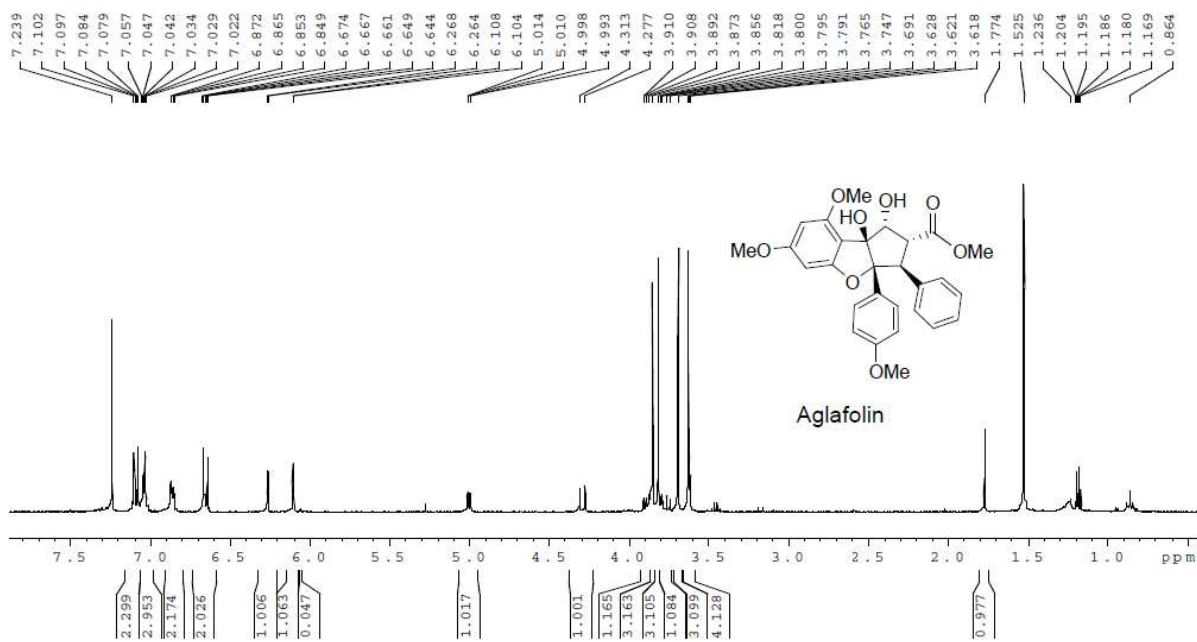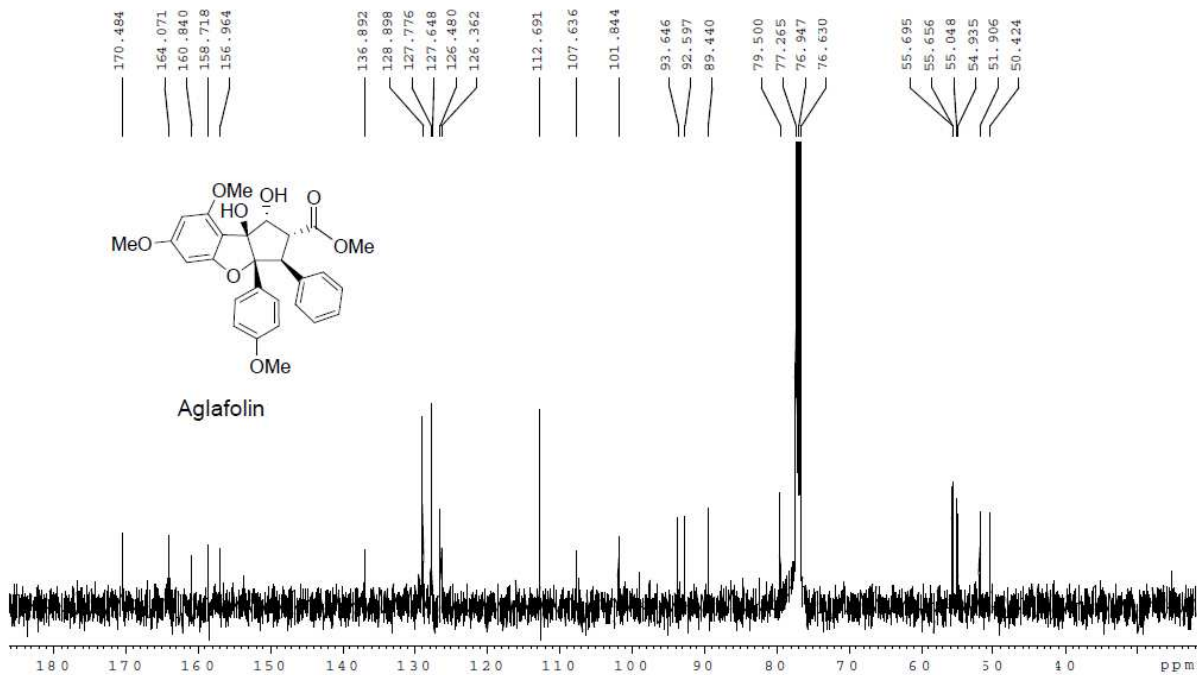

# Compound 1d

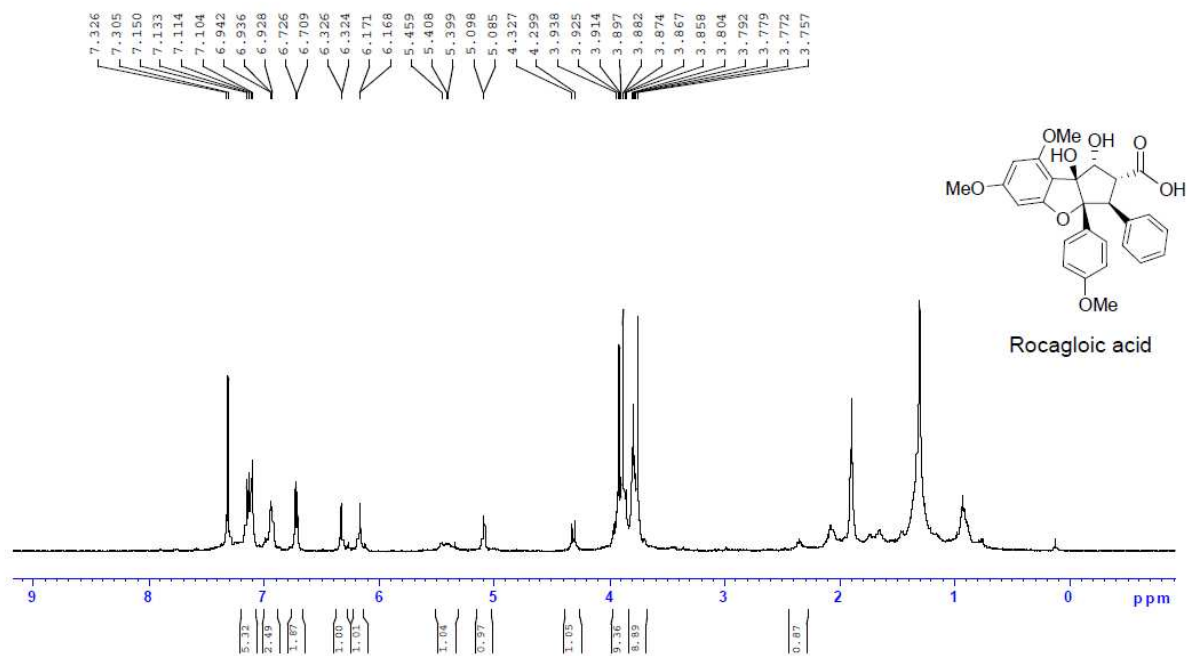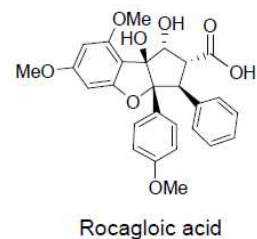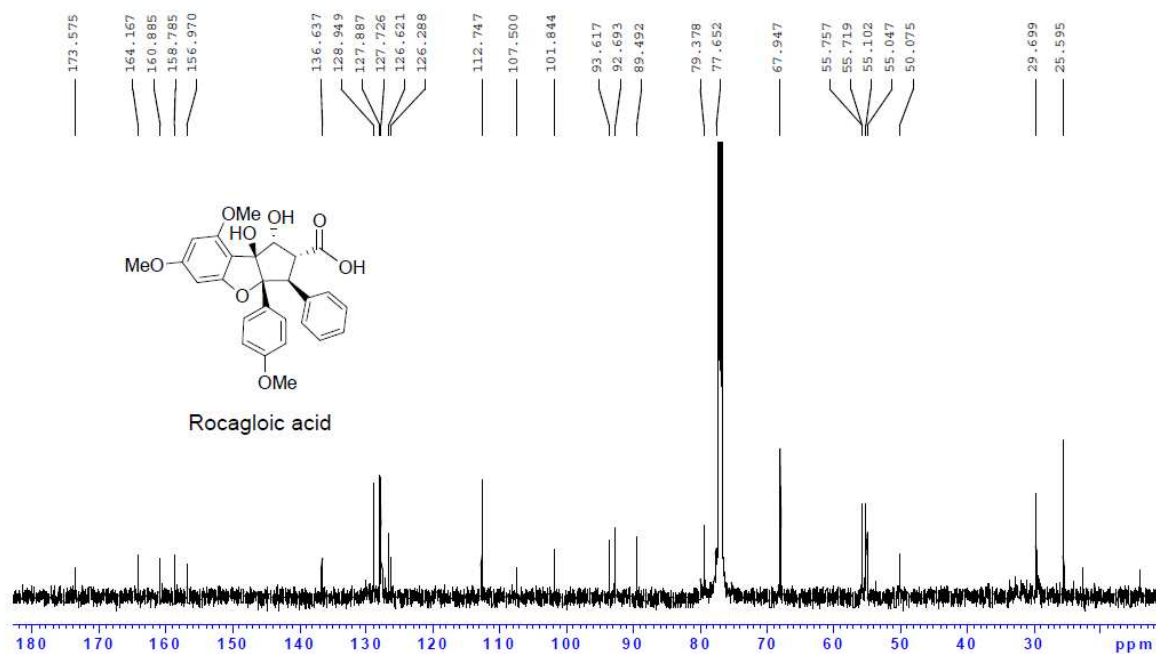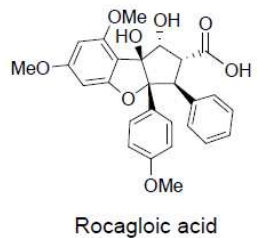

# Compound 1a

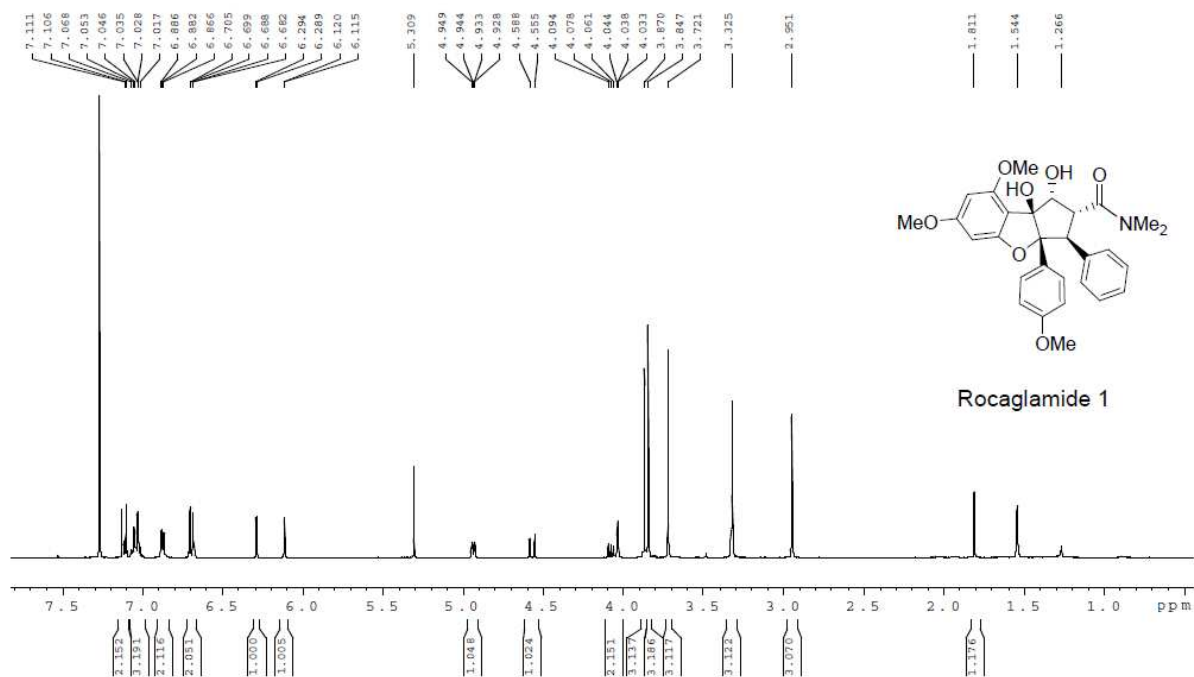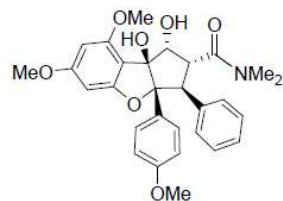

Rocaglamide 1

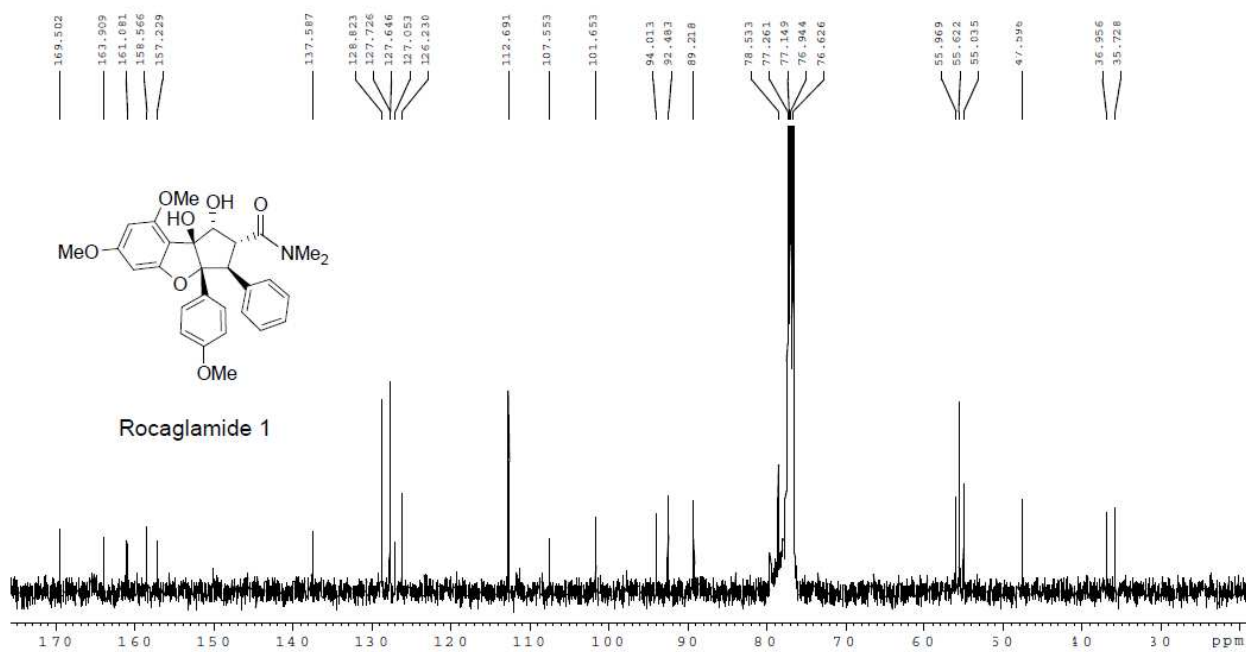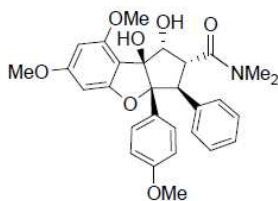

Rocaglamide 1



## 2.0. Justification for Structure Assignment of Mixed Ketal **27**.

The proposed structure of **27** is supported by characterization of two derivatives: carbonate **28a** (X-Ray crystal structure) and triflate **28b** ( $^1\text{H}$  and  $^{13}\text{C}$  NMR data). Comparisons of  $^1\text{H}$  and  $^{13}\text{C}$  data for the mixed ketal and these derivatives reveal that the proton spectra for these compounds vary only in the loss of the doublet at 2.42 ppm ( $\text{OH}$ ), a slight downfield shift of the benzylic proton (4.49 ppm in the free alcohol compared to 4.72 and 4.67 in the carbonate and triflate derivatives respectively) and a dramatic downfield shift of the proton *ipso* to the alcohol (4.63 ppm compared to 5.42 and 5.50 for the carbonate and triflate respectively) with concomitant deconvolution of its signal from a doublet of doublets to a simple doublet in both derivatives. All other signals remain largely unperturbed among all three compounds. The  $^{13}\text{C}$  spectra also show excellent agreement between the three structures. When directly comparing the chemical shifts of the mixed ketal to those of the triflate (Graph 1, Table 1), the average difference in peak shift was 0.03 ppm with the single largest shift being at the alcohol bearing carbon moving downfield from 77.2 ppm in the mixed ketal to 85.0 ppm in the triflate; all other shift differences all being 2.5 ppm or less. Comparison of ketone **15a** to mixed ketal **27** shows a much weaker correlation (Graph 2, Table 1). We take this as indirect evidence that the reactant in these two reactions is the mixed ketal, which has been functionalized exclusively at the secondary alcohol.

Graph 1: Comparison of  $^{13}\text{C}$  Chemical Shifts of Mixed Ketal **27** with Triflate **28b**.

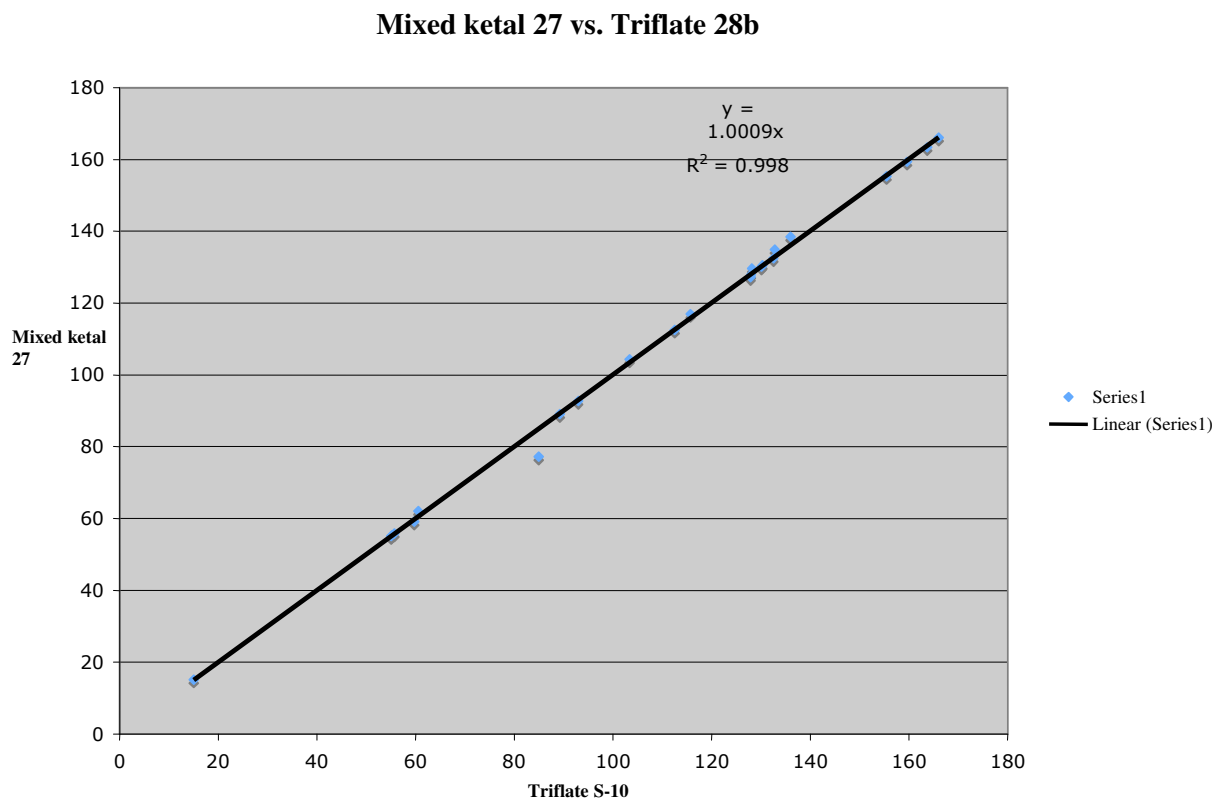

Graph 2: Comparison of  $^{13}\text{C}$  Chemical Shifts of Ketone **15a** with Mixed Ketal **27**.

**Ketone 15a vs. Mixed Ketal 27**

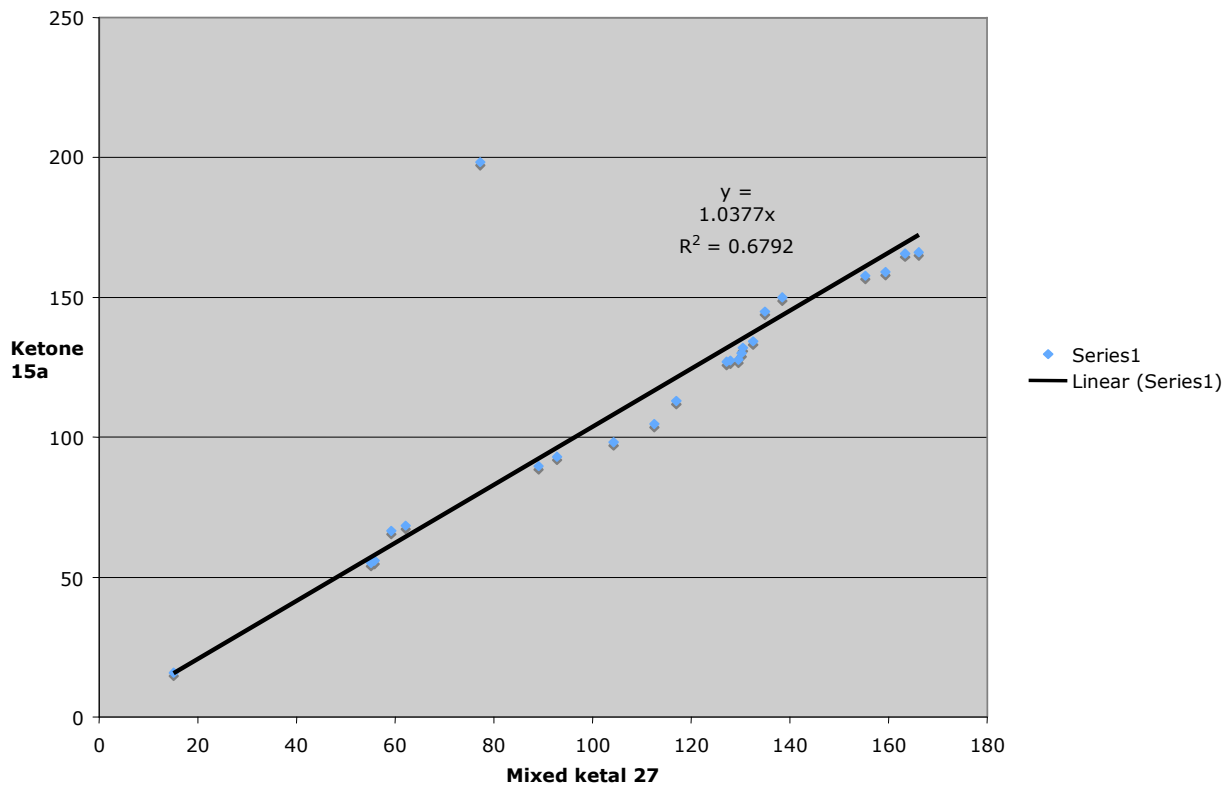

Table 1. Comparison of  $^{13}\text{C}$  Chemical Shift Values of Triflate **S-10**, Mixed Ketal **27**, and Ketone **15a**.

| Triflate <b>S-10</b> | Mixed Ketal <b>27</b> | Ketone <b>15a</b> |
|----------------------|-----------------------|-------------------|
| 15                   | 15.1                  | 15.8              |
| 55                   | 55.1                  | 55.1              |
| 55.2                 | 55.4                  | 55.8              |
| 55.7                 | 55.8                  | 55.9              |
| 59.7                 | 59.2                  | 66.5              |
| 60.5                 | 62.1                  | 68.4              |
| 85                   | 77.2                  | 198.4             |
| 89.2                 | 89.1                  | 89.7              |
| 93                   | 92.8                  | 93                |
| 103.4                | 104.3                 | 98.2              |
| 112.5                | 112.5                 | 104.7             |
| 115.7                | 117                   | 113               |
| 127.9                | 127.2                 | 127               |
| 128                  | 127.9                 | 127.4             |
| 128.2                | 129.6                 | 127.8             |
| 130.1                | 130.2                 | 130               |
| 130.3                | 130.5                 | 132               |
| 132.5                | 132.5                 | 134.3             |
| 132.8                | 134.9                 | 144.9             |
| 136                  | 138.5                 | 149.9             |
| 155.5                | 155.33                | 157.8             |
| 159.6                | 159.4                 | 159.1             |
| 163.7                | 163.4                 | 165.6             |
| 166                  | 166.1                 | 166.1             |
